# Supplementary material for: Cucurbit[8]uril forms tight inclusion complexes with cationic triamantanes
Source: Royal Society of Chemistry journal article supplement (doi:10.1039/d3nj00156c), 2023-01-01
Supplement: d3nj00156c1.pdf [file d3nj00156c1.pdf]

*New Journal of Chemistry*

**Supporting Information**

**Cucurbit[8]uril Forms Tight Inclusion Complexes with Cationic  
Triamantanes**

*By David King,<sup>a</sup> Tatjana Šumanovac,<sup>b</sup> Steven Murkli,<sup>a</sup> Peter R. Schreiner,<sup>c</sup> Marina Šekutor,<sup>b,\*</sup>  
and Lyle Isaacs<sup>a,\*</sup>*

<sup>a</sup> Department of Chemistry and Biochemistry, University of Maryland, College Park, Maryland  
20742, United States; <sup>b</sup> Department of Organic Chemistry and Biochemistry, Ruđer Bošković  
Institute, Bijenička cesta 54, 10000, Zagreb, Croatia; <sup>c</sup> Institute of Organic Chemistry, Justus  
Liebig University, Heinrich-Buff-Ring 17, 35392 Giessen, Germany

\*To whom correspondence should be addressed. Prof. Lyle Isaacs, Email: [LIsaacs@umd.edu](mailto:LIsaacs@umd.edu);

Dr. Marina Šekutor, Email: [msekutor@irb.hr](mailto:msekutor@irb.hr)

| Table of Contents                                                                                                                        | Pages     |
|------------------------------------------------------------------------------------------------------------------------------------------|-----------|
| <sup>1</sup> H and <sup>13</sup> C NMR spectra recorded for new compounds ( <b>G1</b> and <b>G3</b> )                                    | S3 – S6   |
| <sup>1</sup> H NMR binding studies for CB[7] and CB[8] toward triamantanes <b>G1</b> – <b>G4</b>                                         | S7 – S18  |
| Determination of $K_a$ of CB[7] towards <b>G1</b> , <b>G2</b> and <b>G4</b> using Isothermal Titration Calorimetry (ITC).                | S19 – S21 |
| Determination of $K_a$ of CB[7] and CB[8] towards <b>G1</b> , <b>G3</b> , and <b>G4</b> using <sup>1</sup> H NMR Competition experiments | S22 – S24 |
| Affinometer Output Files from the Competitive Titration of CB[8] + C3 with <b>G3</b> or <b>G4</b> .                                      | S25 – S36 |
| Molecular modelling of the CB[7] and CB[8] complexes with <b>G1</b> – <b>G3</b>                                                          | S37 – S63 |

SpinWorks 4:

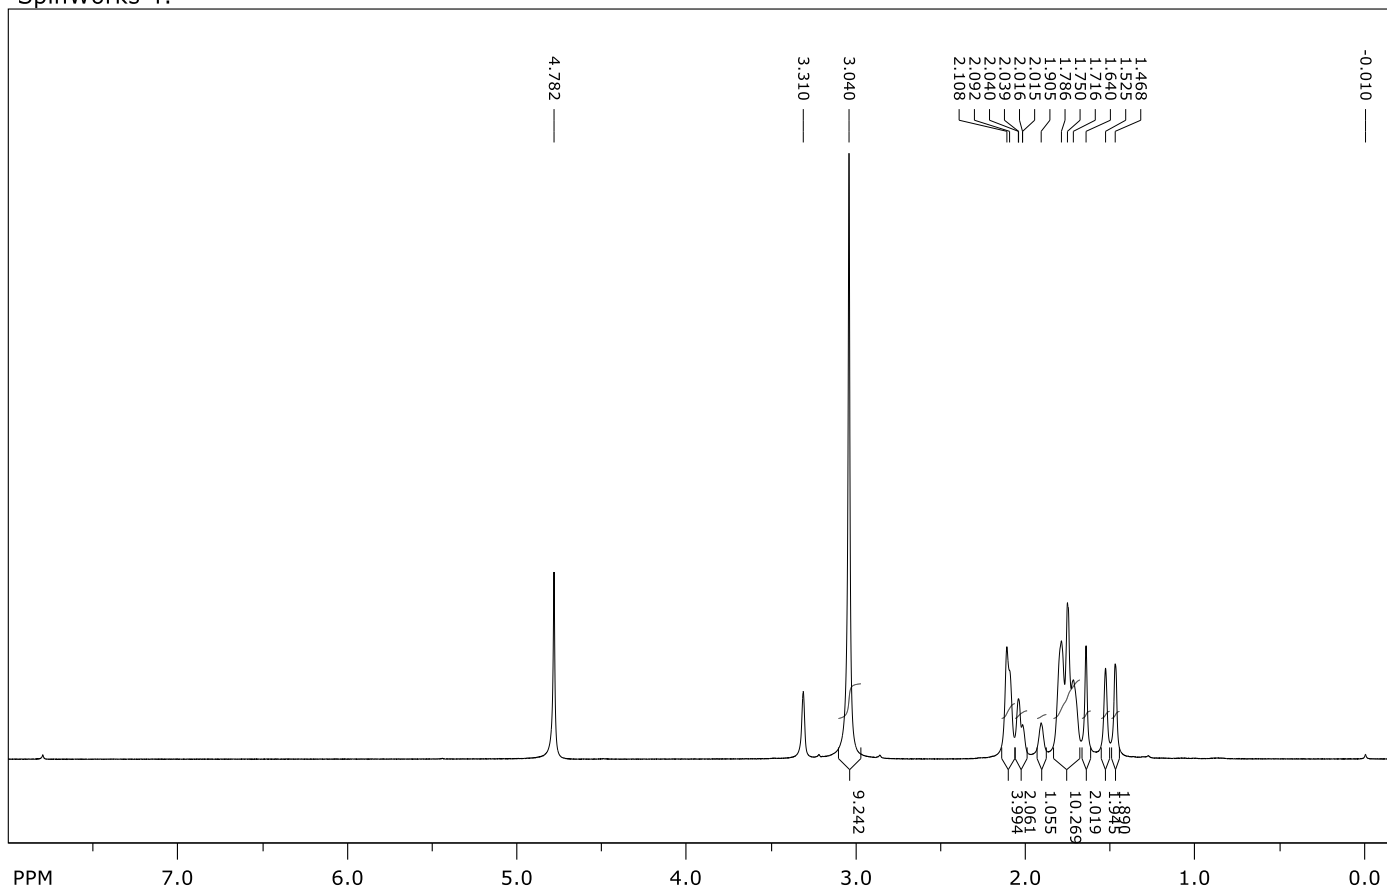

file: D:\NMR\M070-2-1H\spectrum.dx expt: <zg30>  
transmitter freq.: 400.252472 MHz  
time domain size: 65536 points  
width: 8012.82 Hz = 20.0194 ppm = 0.122266 Hz/pt  
number of scans: 0

freq. of 0 ppm: 400.250008 MHz  
processed size: 65536 complex points  
LB: 0.000 GF: 0.0000

**Figure S1.**  $^1\text{H}$  NMR (400 MHz,  $\text{CDCl}_3$  + few drops of  $\text{CD}_3\text{OD}$ ) recorded for *N,N,N*-trimethyltriarmantane-9-aminium iodide (**G1•I<sup>-</sup>**).

SpinWorks 4:

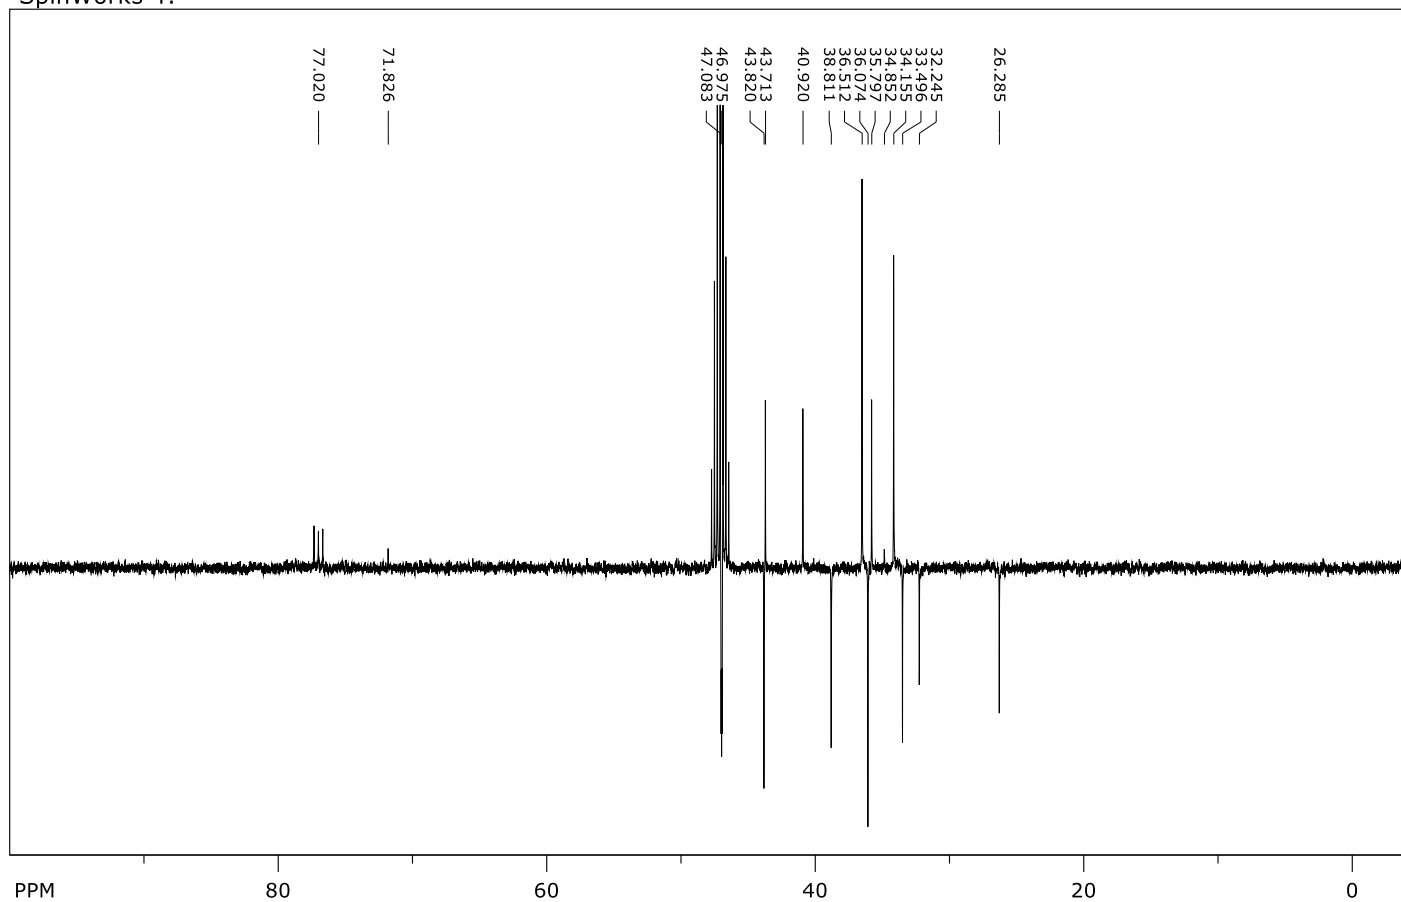

file: D:\NMR\M070-2-APT\spectrum.dx expt: <jmod>  
transmitter freq.: 100.653007 MHz  
time domain size: 32768 points  
width: 24038.46 Hz = 238.8251 ppm = 0.733596 Hz/pt  
number of scans: 0

freq. of 0 ppm: 100.643018 MHz  
processed size: 32768 complex points  
LB: 0.000 GF: 0.0000

**Figure S2.**  $^{13}\text{C}$  NMR (100 MHz,  $\text{CDCl}_3$  + few drops of  $\text{CD}_3\text{OD}$ ) of *N,N,N*-trimethyltriangulane-9-aminium iodide (**G1•I**<sup>-</sup>).

SpinWorks 4:

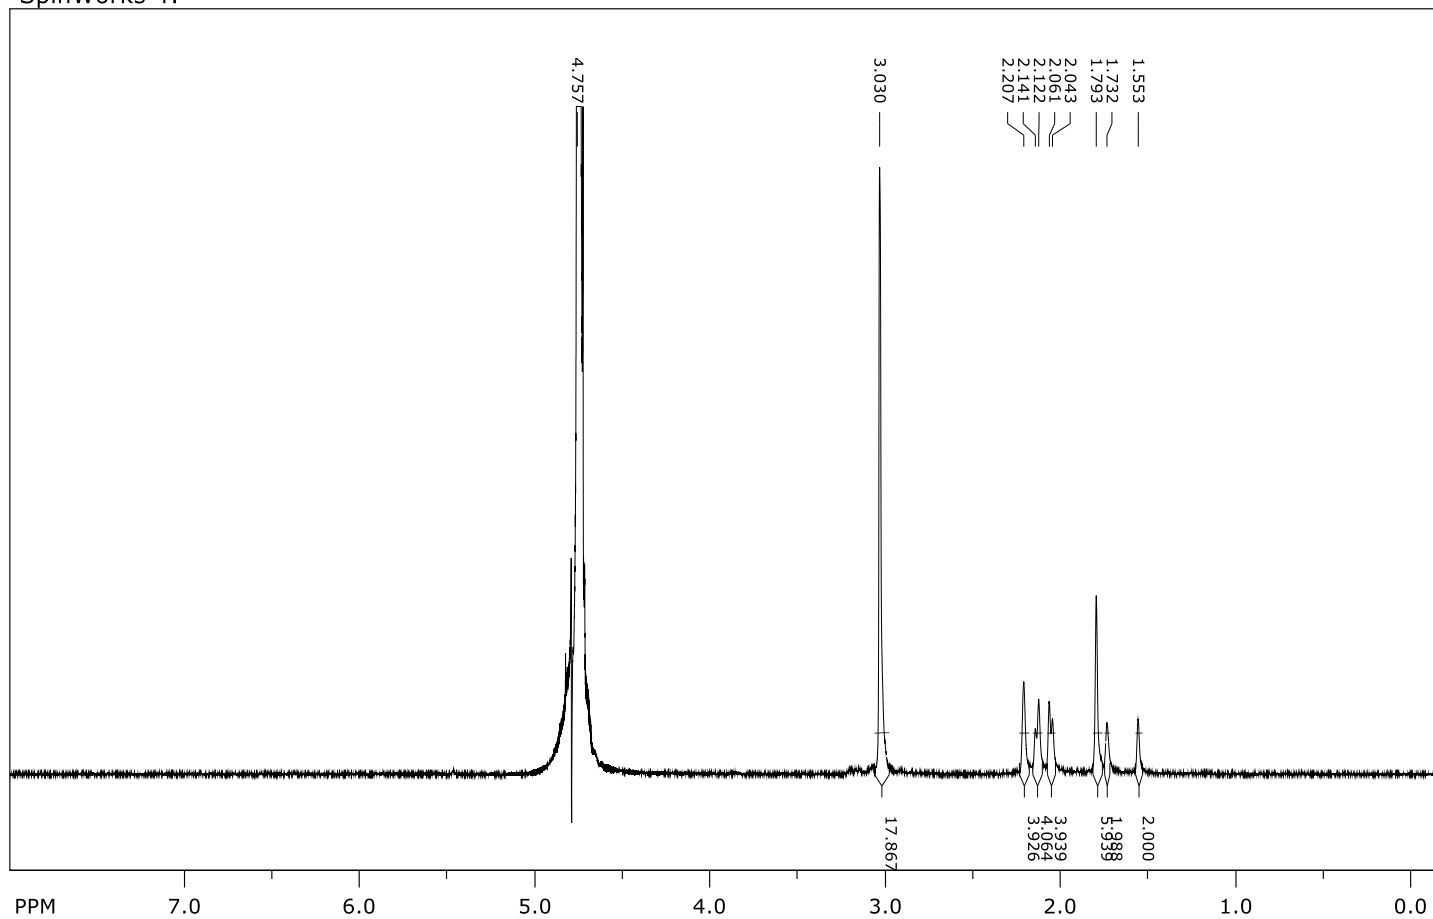

file: D:\NMR\M088-I-C-1H\spectrum.dx expt: <zg30>  
transmitter freq.: 600.135401 MHz  
time domain size: 32768 points  
width: 12019.23 Hz = 20.0275 ppm = 0.366798 Hz/pt  
number of scans: 0

freq. of 0 ppm: 600.129962 MHz  
processed size: 32768 complex points  
LB: 0.000 GF: 0.0000

**Figure S3.**  $^1\text{H}$  NMR (600 MHz,  $\text{D}_2\text{O}$ ) recorded for  $N,N,N',N',N',N'$ -hexamethyltri-9,15-diaminium diiodide ( $\text{G3}\cdot 2\text{I}^-$ ).

SpinWorks 4:

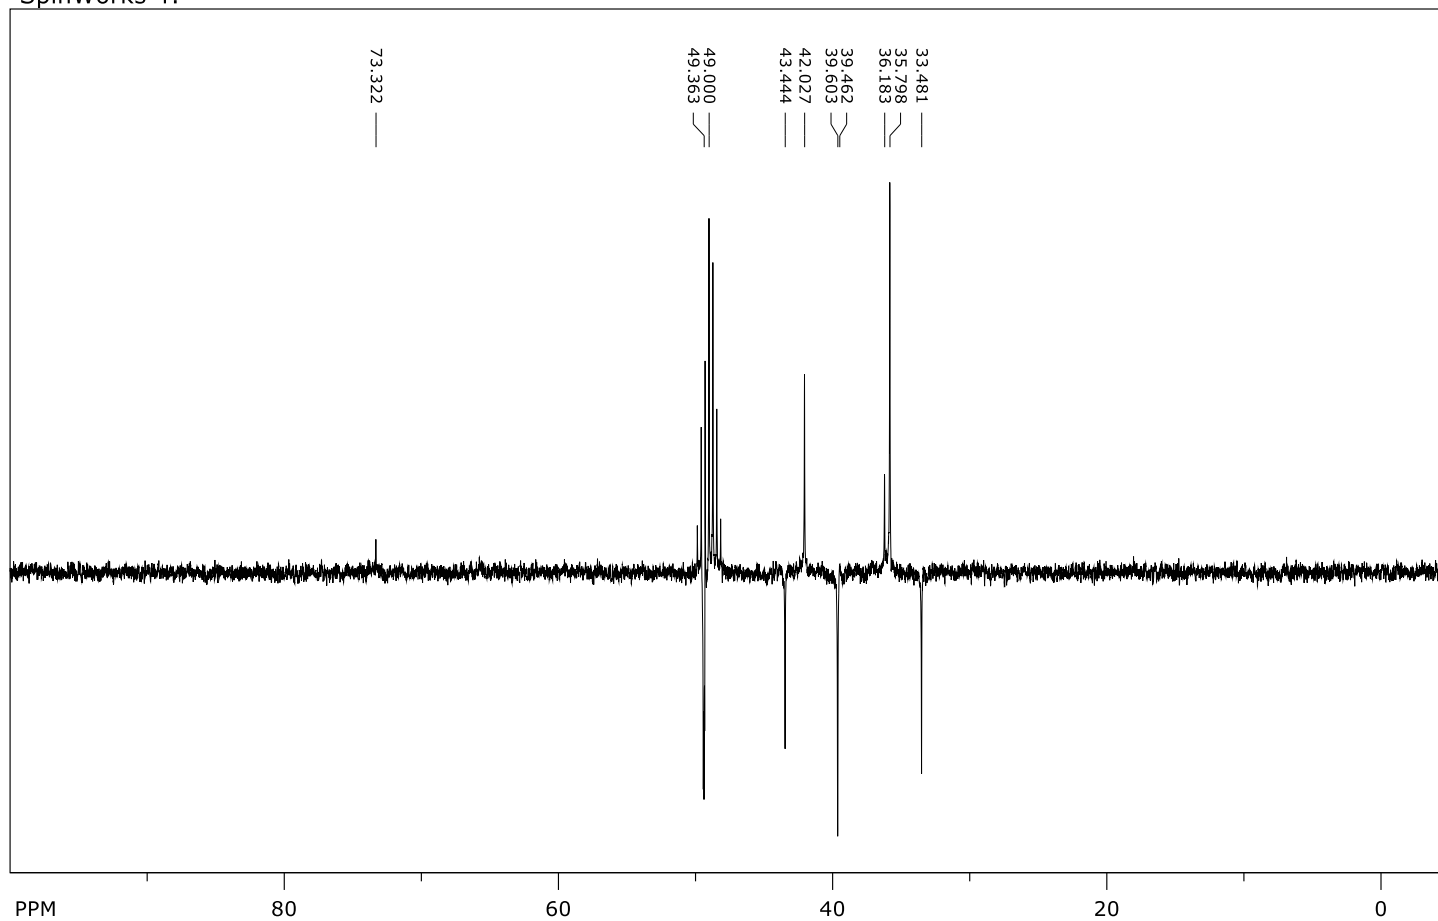

file: D:\NMR\M088-APT\spectrum.dx expt: <jmod>  
transmitter freq.: 75.475295 MHz  
time domain size: 32768 points  
width: 17985.61 Hz = 238.2980 ppm = 0.548877 Hz/pt  
number of scans: 0

freq. of 0 ppm: 75.467645 MHz  
processed size: 32768 complex points  
LB: 0.000 GF: 0.0000

**Figure S4.**  $^{13}\text{C}$  NMR (75 MHz,  $\text{CD}_3\text{OD}$ ) recorded for  $N,N,N,N',N',N'$ -hexamethyltriamantane-9,15-diaminium diiodide ( $\text{G3}\cdot 2\text{I}^-$ ).

**<sup>1</sup>H NMR binding studies for CB[7] and CB[8] toward triamantanes G1 – G4**

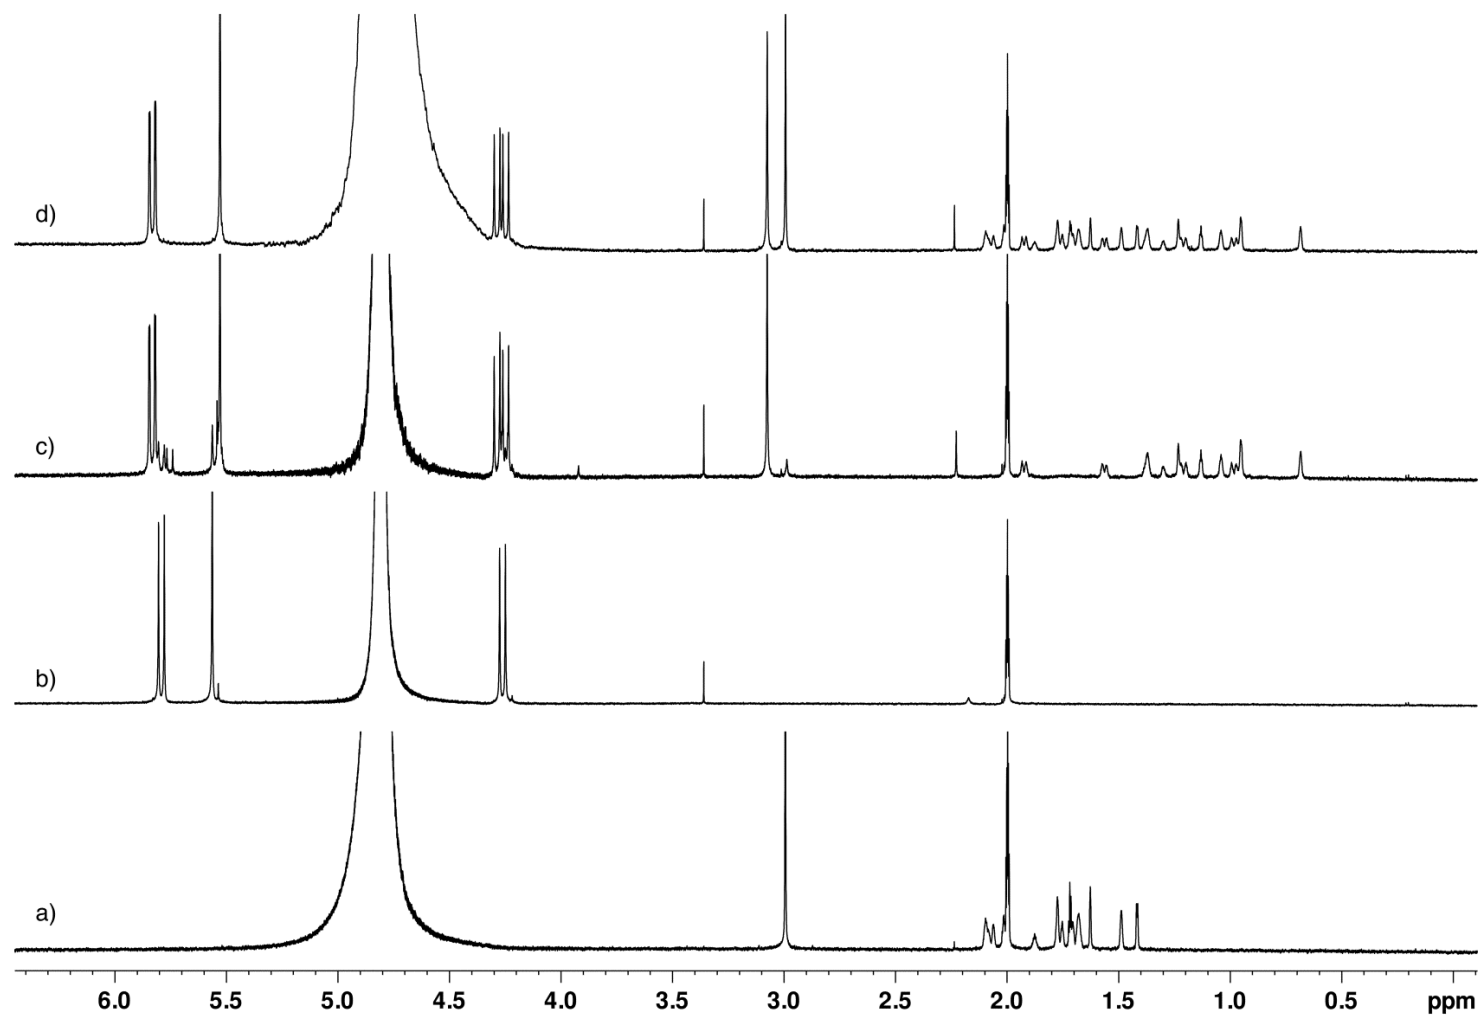

**Figure S5.** <sup>1</sup>H NMR spectra recorded (600 MHz, RT, 50 mM NaO<sub>2</sub>CCD<sub>3</sub>, pD 4.74) for: a) **G1** (0.5 mM), b) CB[7] (0.2 mM), c) an equimolar mixture of **G1** and CB[7] (0.2 mM), and d) a mixture of **G1** (0.4 mM) and CB[7] (0.2 mM).

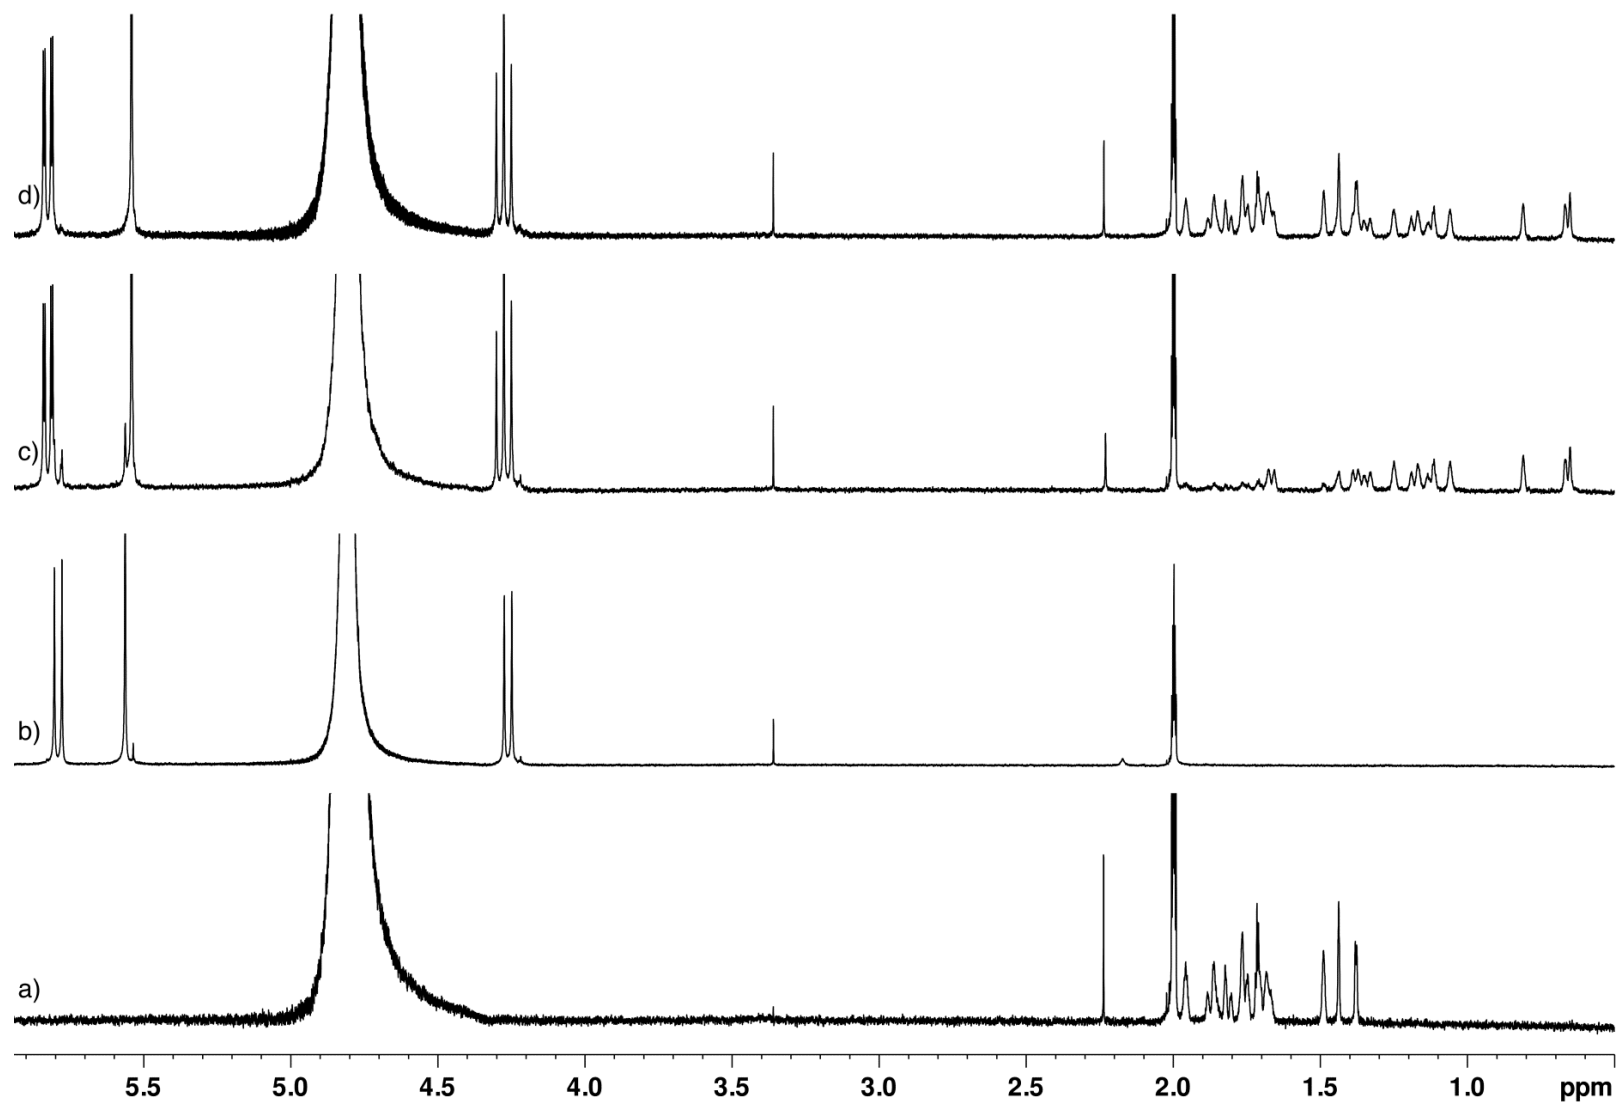

**Figure S6.** <sup>1</sup>H NMR spectra recorded (600 MHz, RT, 50 mM NaO<sub>2</sub>CCD<sub>3</sub>, pD 4.74) for: a) **G2** (0.5 mM), b) **CB[7]** (0.2 mM), c) an equimolar mixture **G2** and **CB[7]** (0.2 mM), and d) a mixture of **G2** (0.4 mM) and **CB[7]** (0.2 mM).



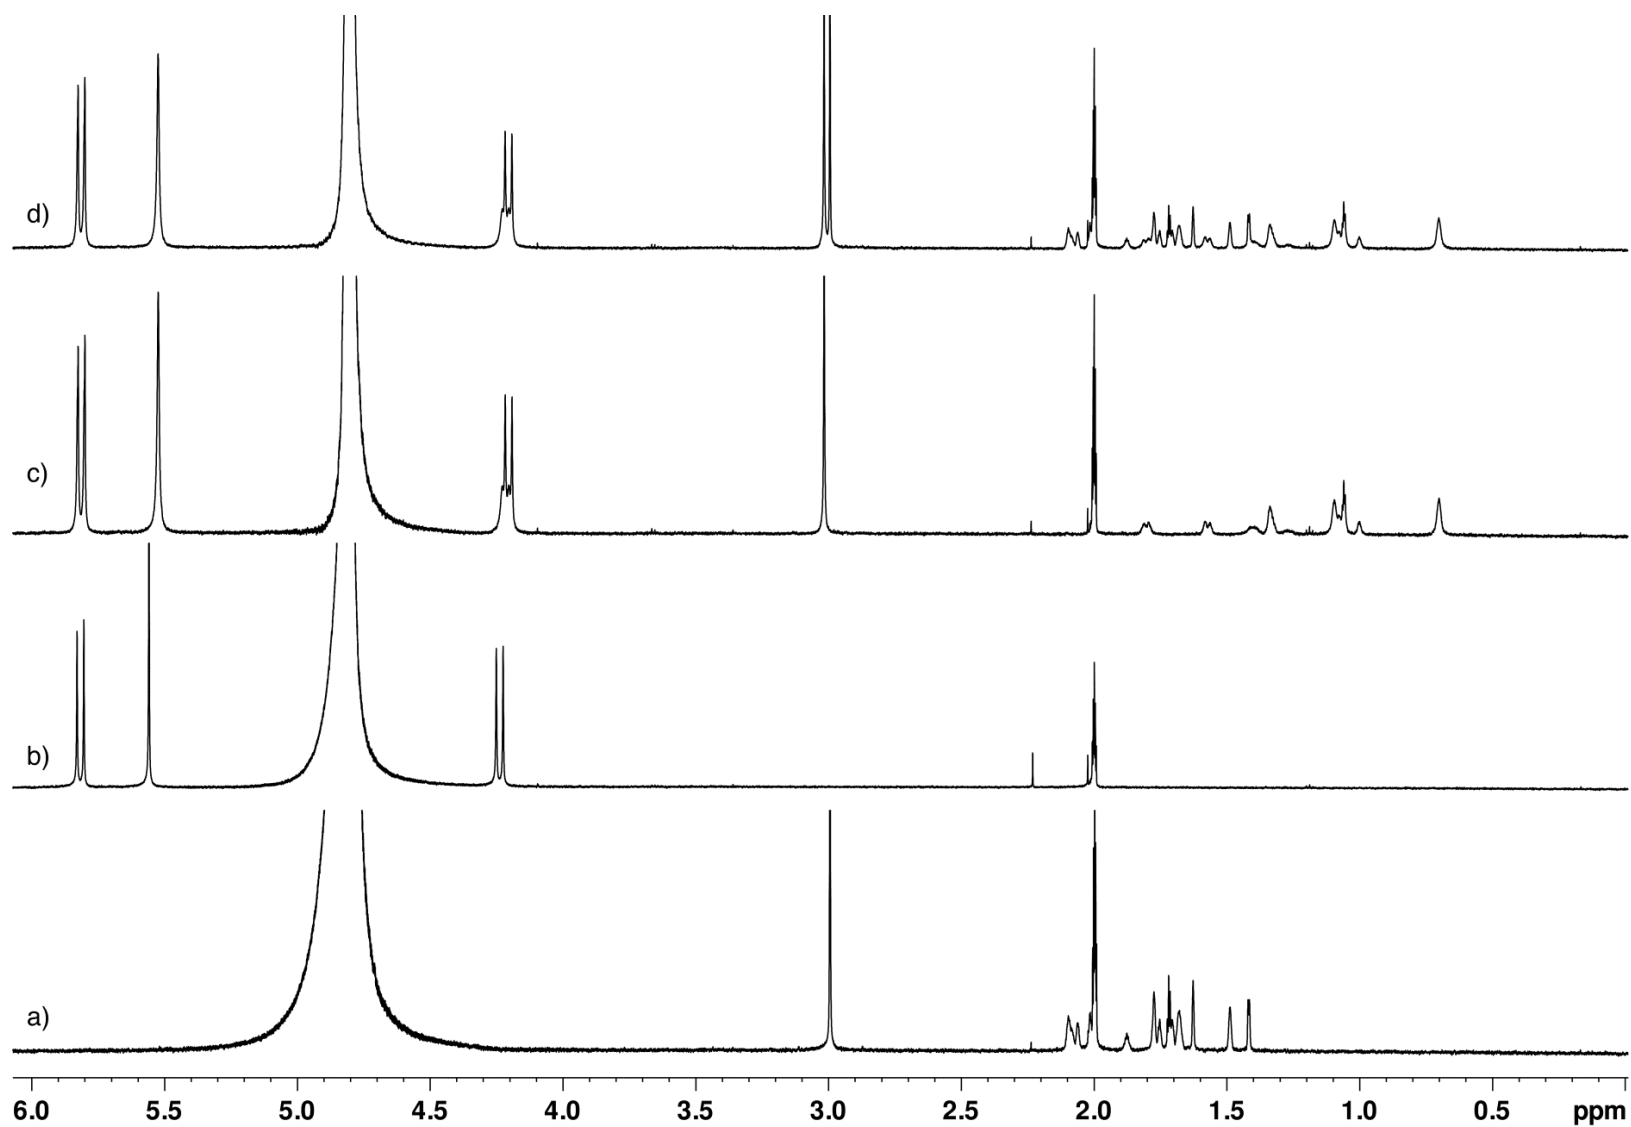

**Figure S7.** <sup>1</sup>H NMR spectra recorded (600 MHz, RT, 50 mM Na<sub>2</sub>CO<sub>3</sub>, pD 4.74) for: a) **G1** (0.5 mM), b) **CB[8]** (0.2 mM), c) an equimolar mixture of **G1** and **CB[8]** (0.2 mM), and d) a mixture of **G1** (0.4 mM) and **CB[8]** (0.2 mM).

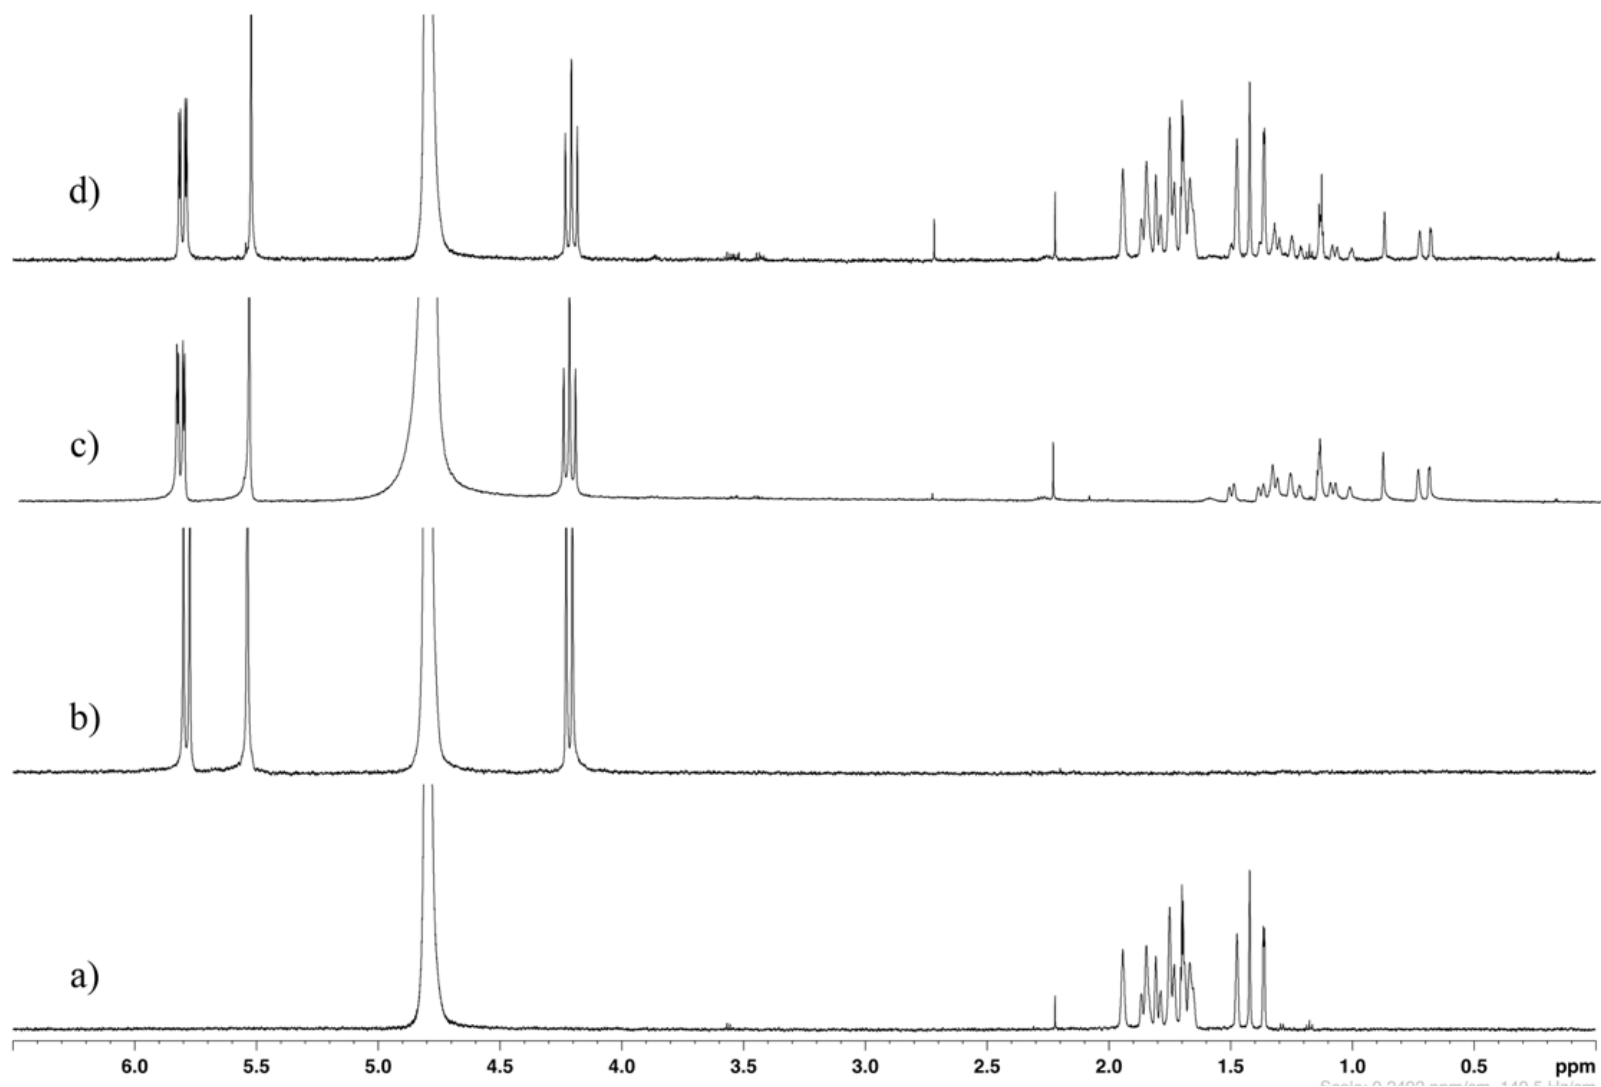

**Figure S8.**  $^1\text{H}$  NMR spectra recorded (600 MHz, RT,  $\text{D}_2\text{O}$ ) for: a) **G2** (0.5 mM), b) **CB[8]** (0.2 mM), c) an equimolar mixture of **G2** and **CB[8]** (0.2 mM), and d) a mixture of **G2** (0.4 mM) and **CB[8]** (0.2 mM). The **CB[8]•G2** complex precipitates from solution but can be made temporarily soluble by heating to obtain the NMR spectra given above.

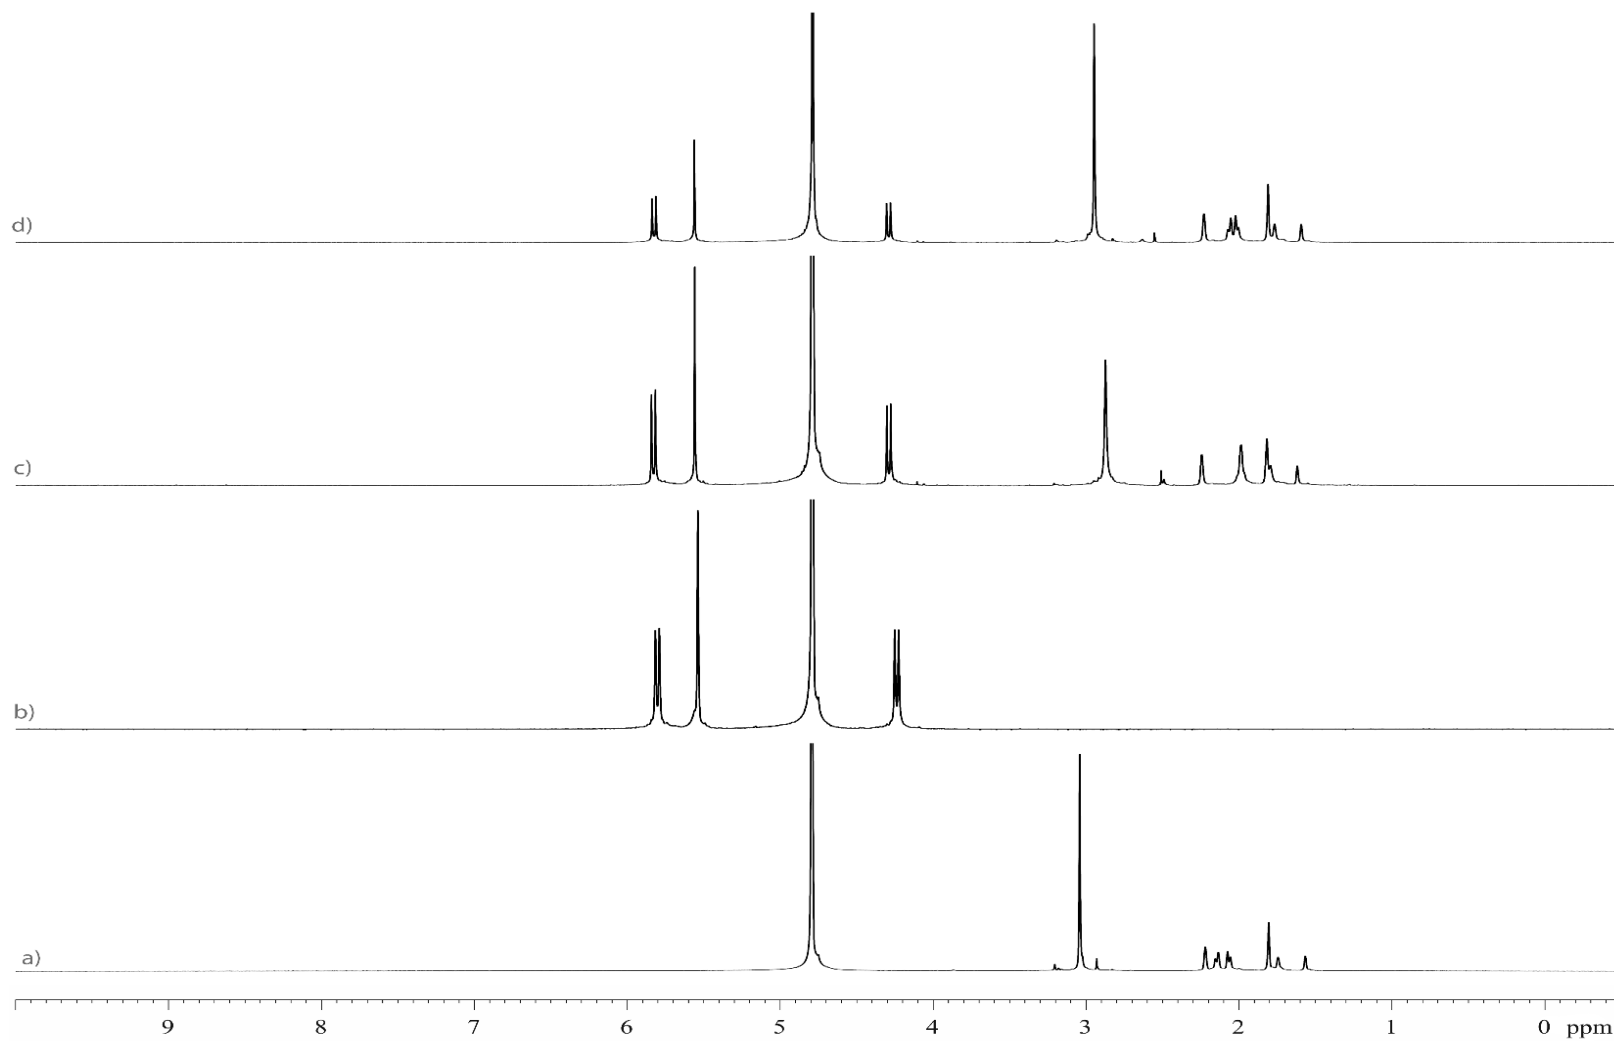

**Figure S9.**  $^1\text{H}$  NMR spectra recorded for (600 MHz, RT,  $\text{D}_2\text{O}$ ) for: a) **G3** (1.0 mM), b) **CB[7]** (1.0 mM), c) an equimolar mixture of **G3** and **CB[7]** (1.0 mM), and d) a mixture of **G3** (2.0 mM) and **CB[7]** (1.0 mM).

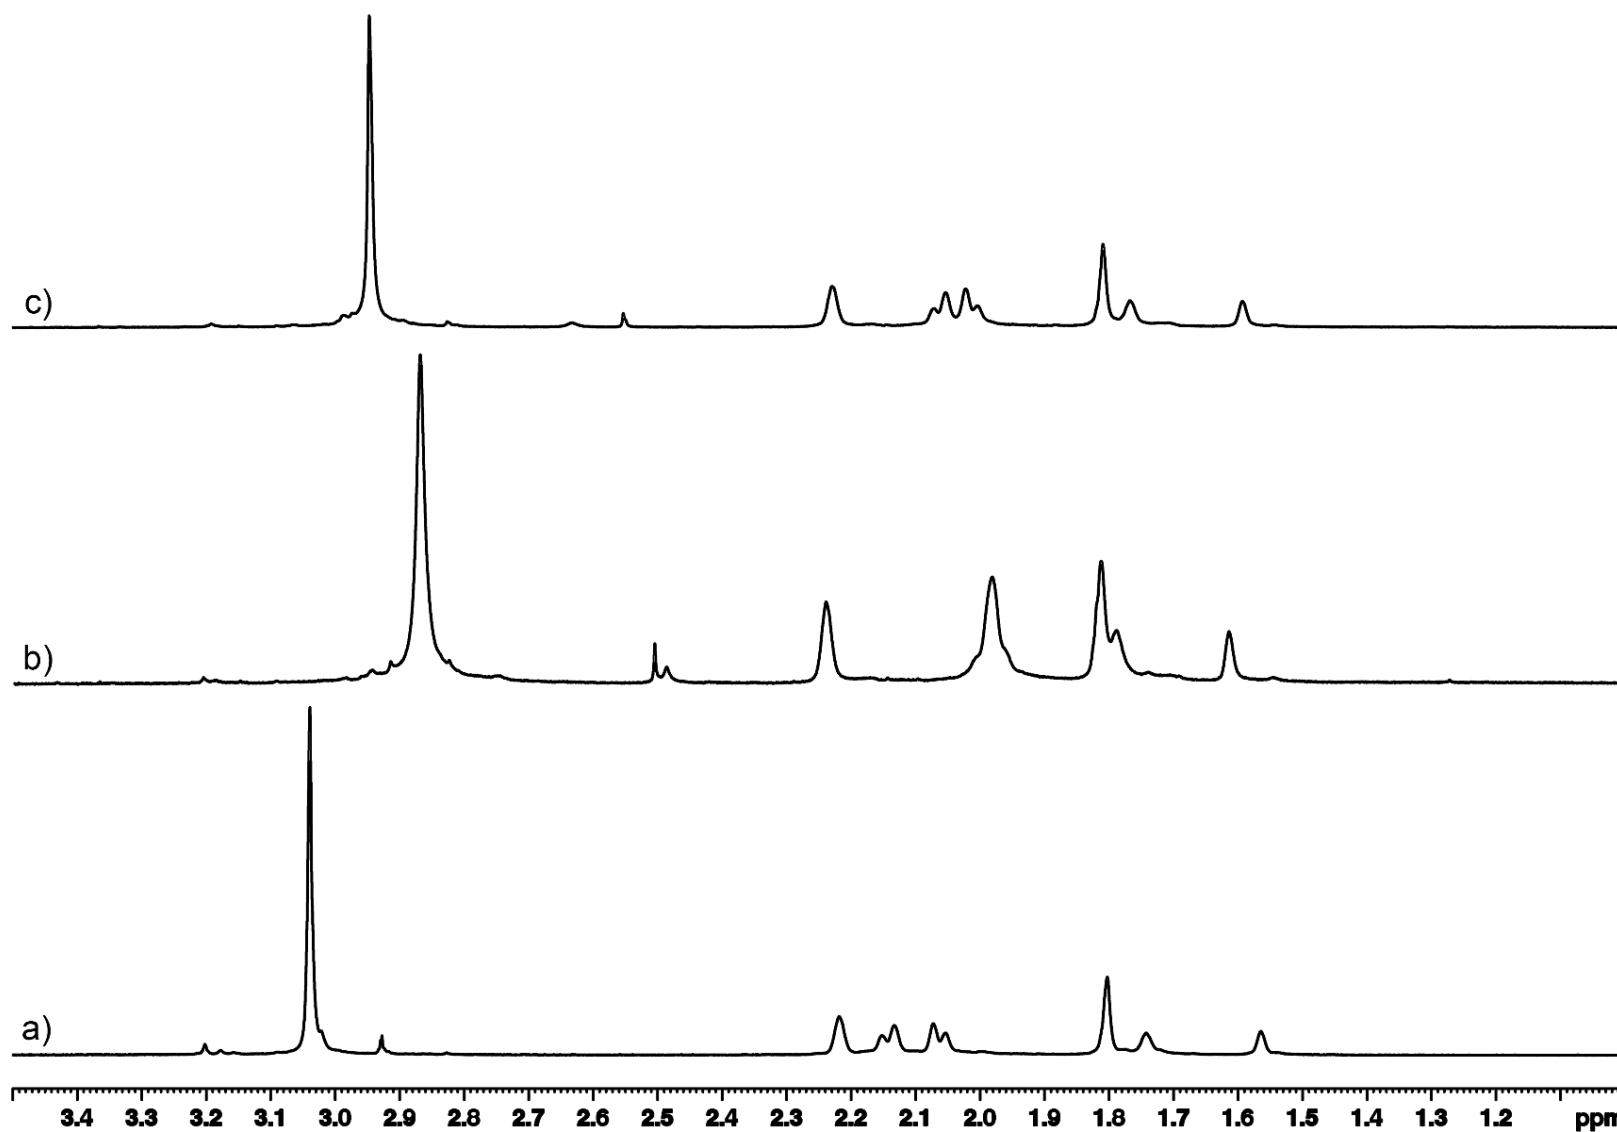

**Figure S10.** The expanded guest region for  $^1\text{H}$  NMR spectra recorded for (600 MHz, RT,  $\text{D}_2\text{O}$ ) for: a) **G3** (1.0 mM), b) an equimolar mixture of **G3** and **CB[7]** (1.0 mM), and c) a mixture of **G3** (2.0 mM) and **CB[7]** (1.0 mM).

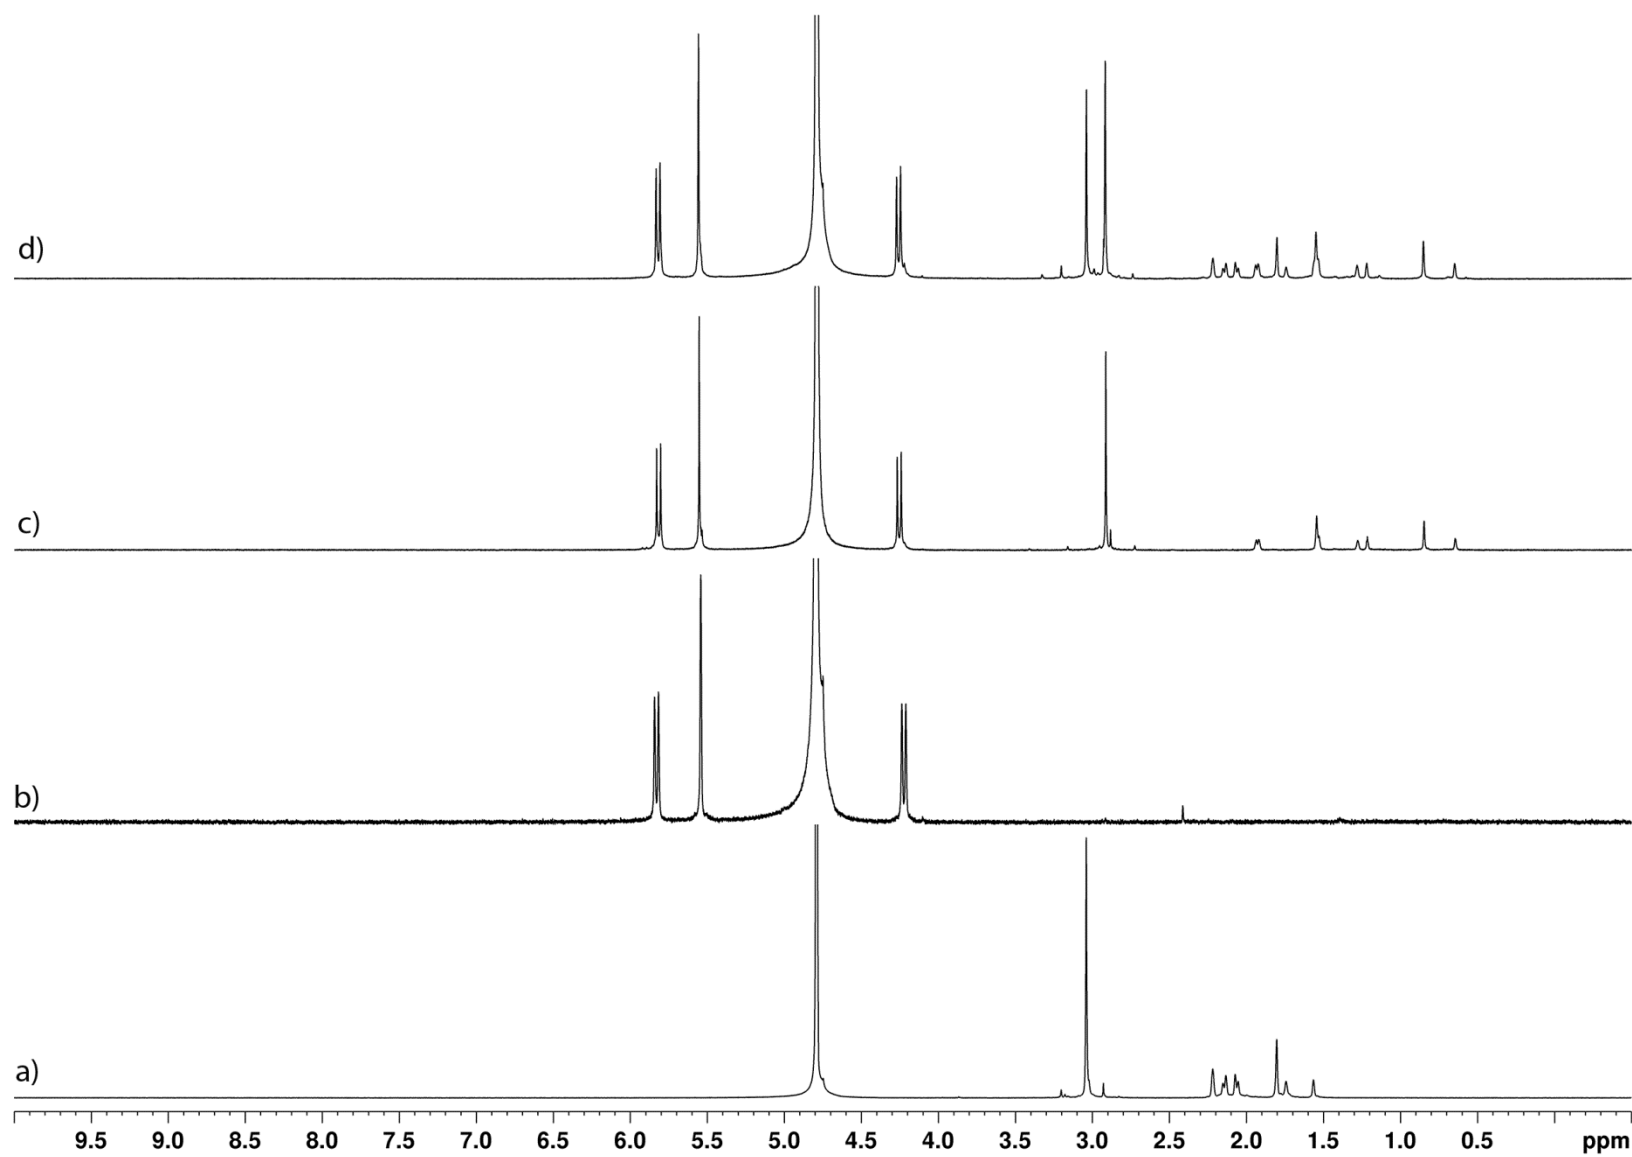

**Figure S11.** <sup>1</sup>H NMR spectra recorded for (600 MHz, RT, D<sub>2</sub>O) for: a) **G3** (1.0 mM), b) CB[8] (0.5 mM), c) an equimolar mixture of **G3** and CB[8] (0.5 mM), and d) a mixture of **G3** (1.0 mM) and CB[8] (0.5 mM).

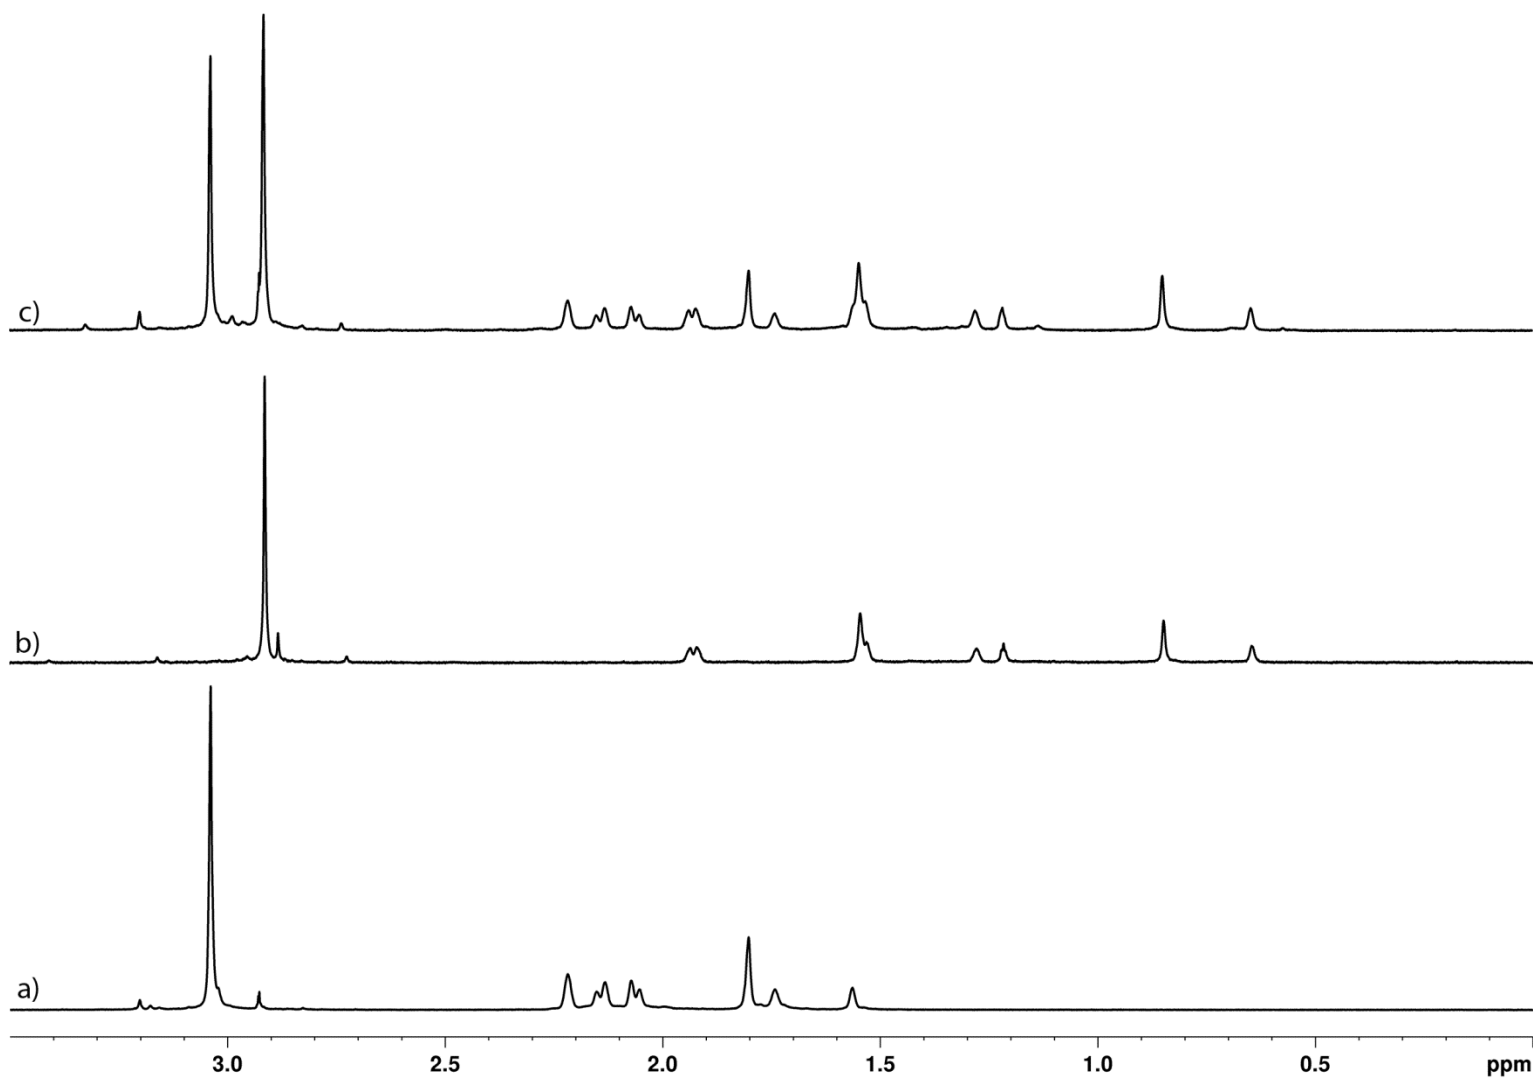

**Figure S12.** The expanded guest region for  $^1\text{H}$  NMR spectra recorded for (600 MHz, RT,  $\text{D}_2\text{O}$ ) for: a) **G3** (1.0 mM), b) an equimolar mixture of **G3** and **CB[8]** (0.5 mM), and c) a mixture of **G3** (1.0 mM) and **CB[8]** (0.5 mM).

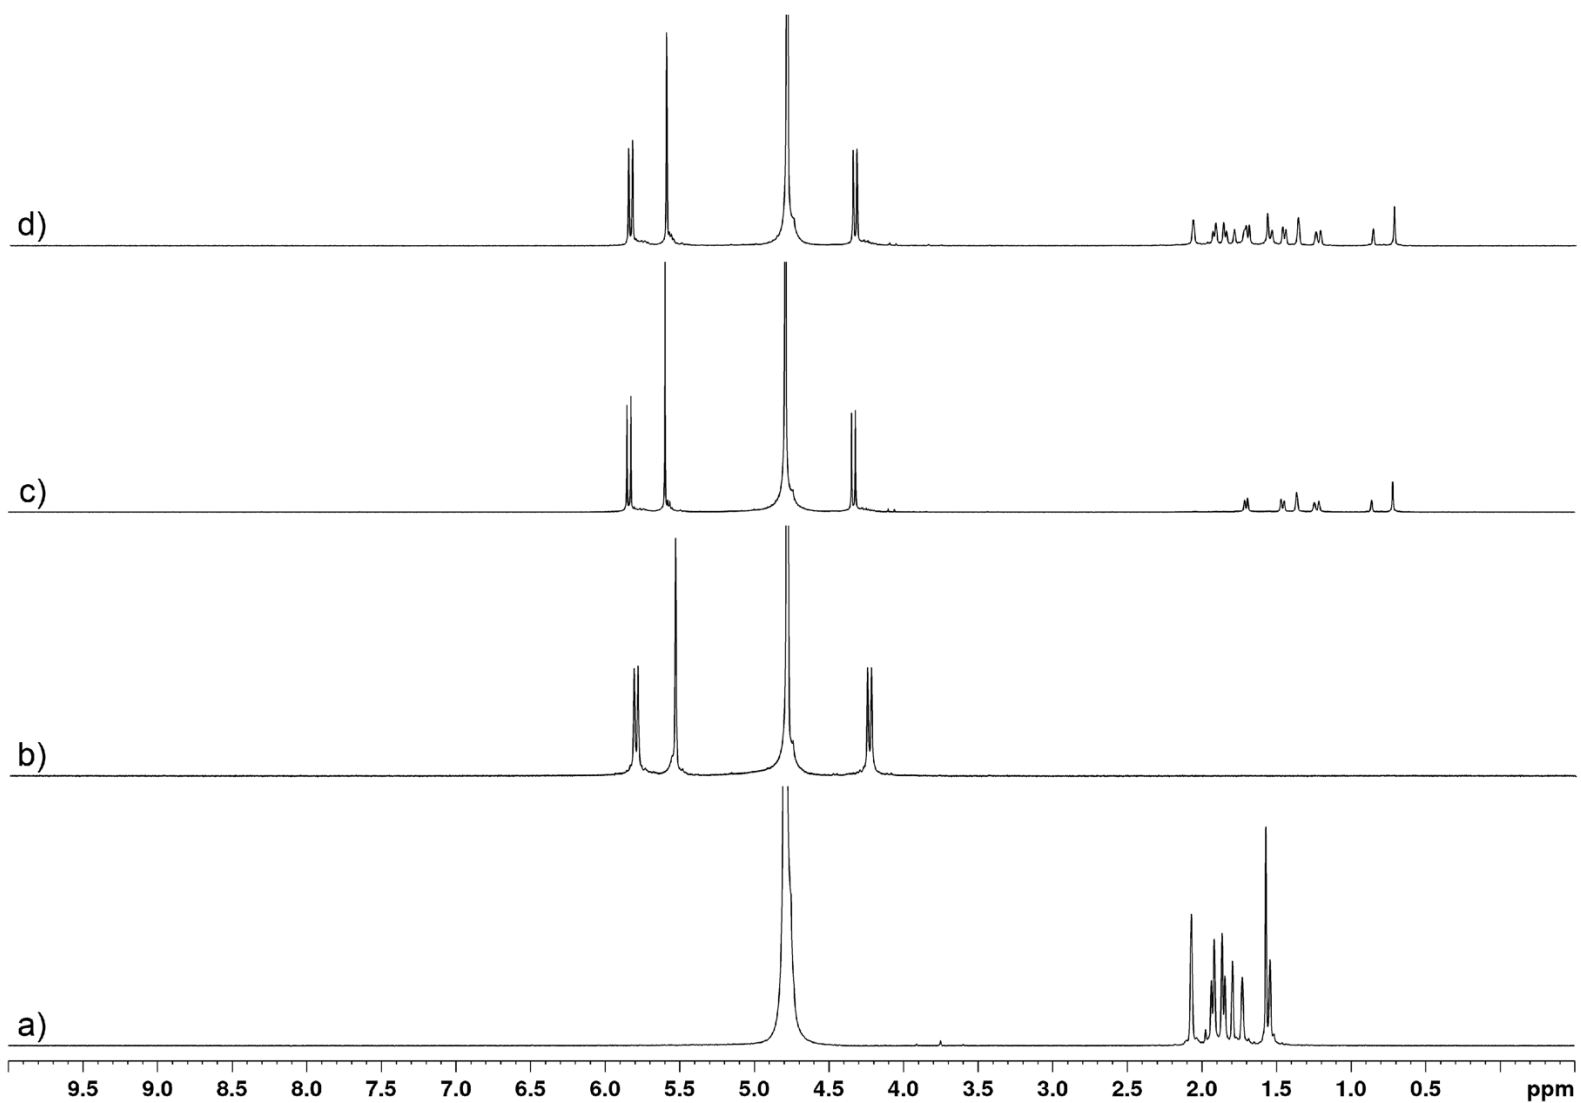

**Figure S13.** <sup>1</sup>H NMR spectra recorded for (600 MHz, RT, D<sub>2</sub>O) for: a) **G4** (1.0 mM), b) **CB[7]** (1.0 mM), c) an equimolar mixture of **G4** and **CB[7]** (1.0 mM), and d) a mixture of **G4** (2.0 mM) and **CB[7]** (1.0 mM).

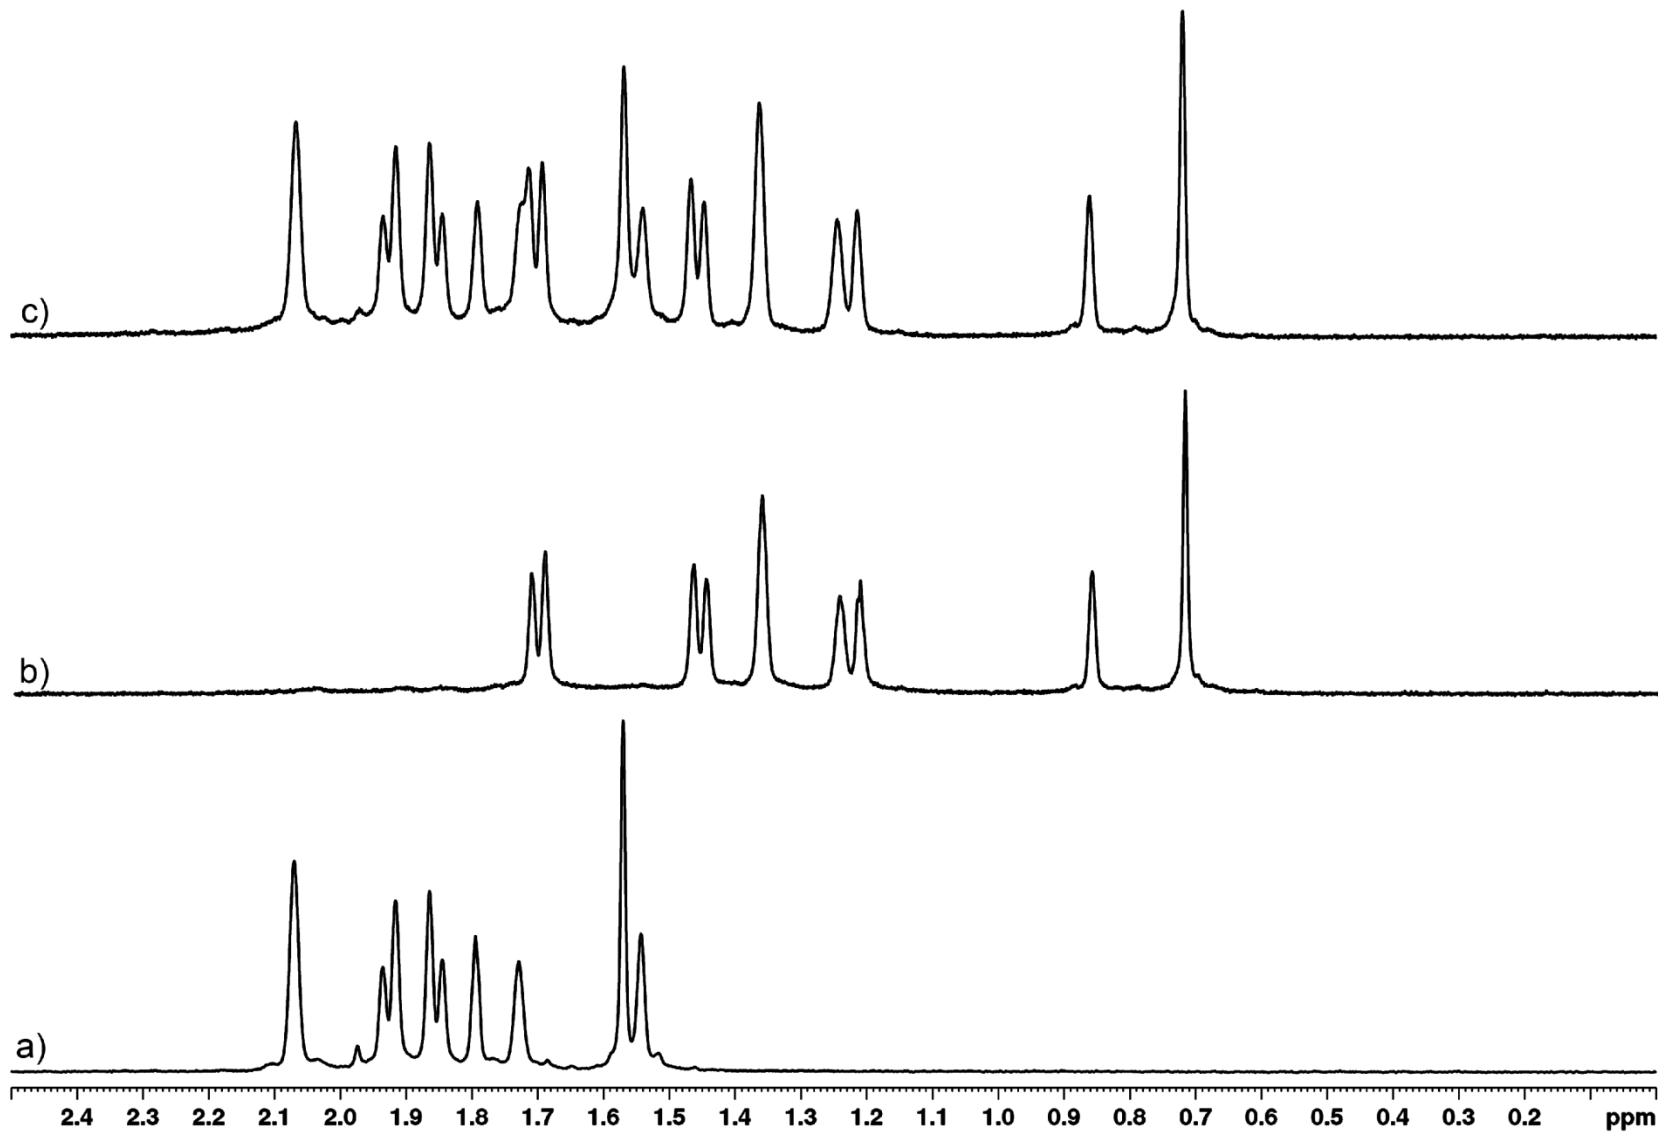

**Figure S14.** The expanded guest region for  $^1\text{H}$  NMR spectra recorded for (600 MHz, RT,  $\text{D}_2\text{O}$ ) for: a) **G4** (1.0 mM), b) an equimolar mixture of **G4** and **CB[7]** (1.0 mM), and c) a mixture of **G4** (2.0 mM) and **CB[7]** (1.0 mM).



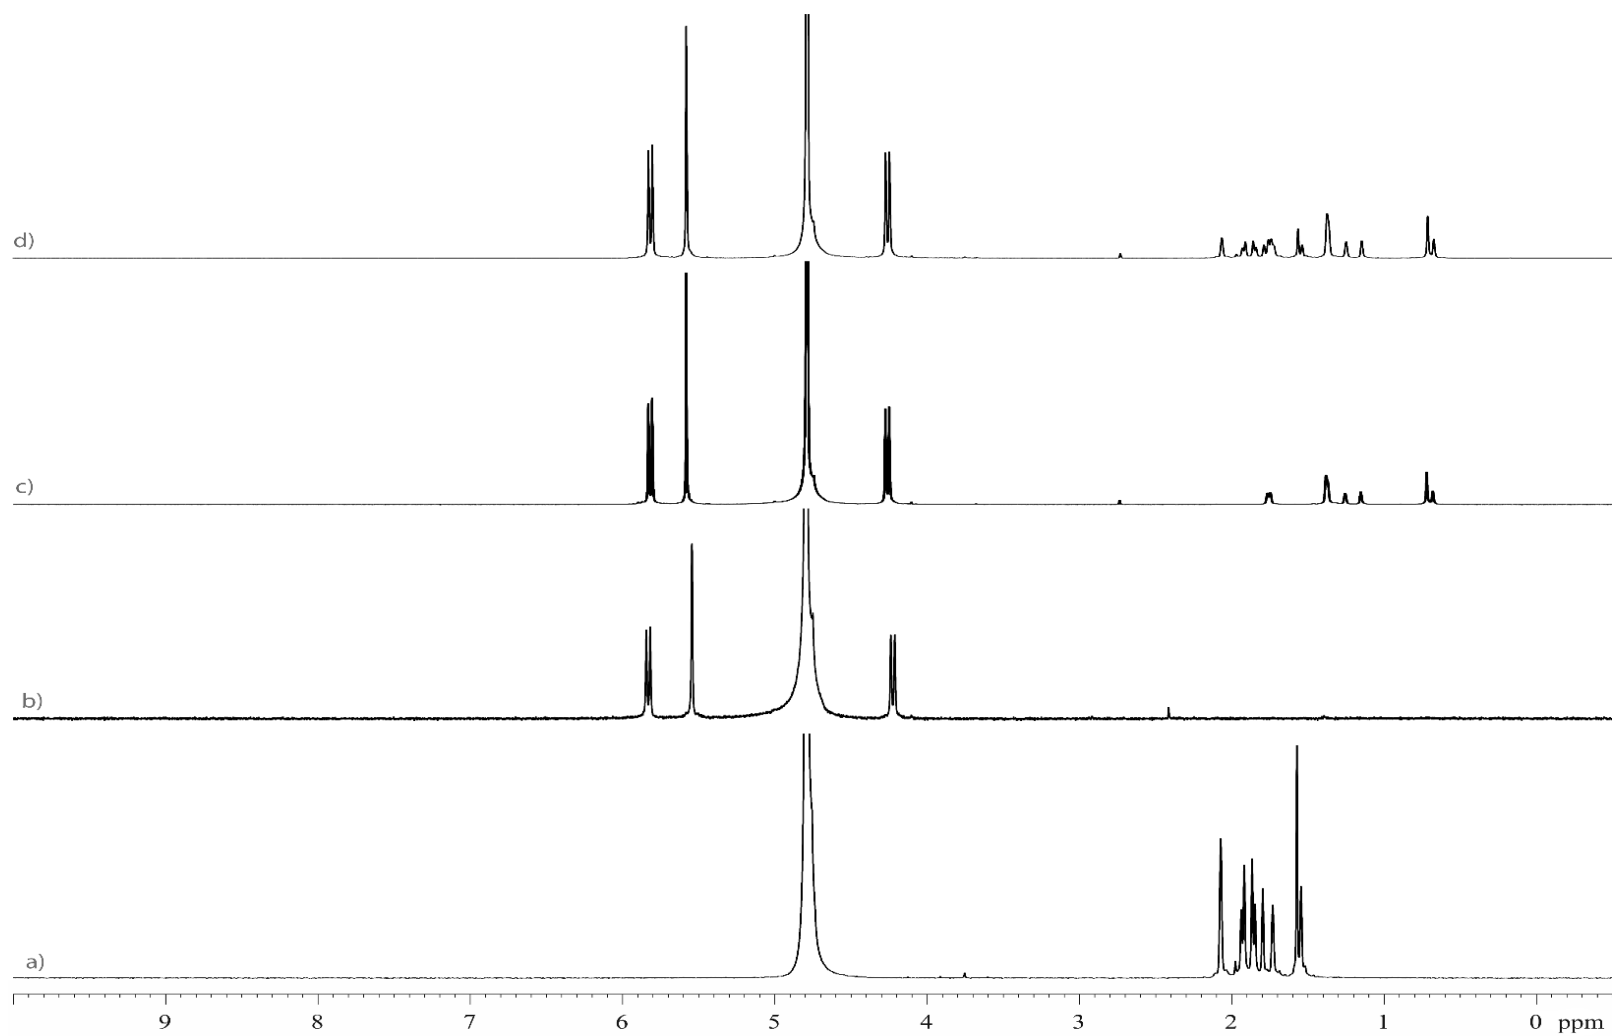

**Figure S15.** <sup>1</sup>H NMR spectra recorded for (600 MHz, RT, D<sub>2</sub>O) for: a) **G4** (1.0 mM), b) **CB[8]** (0.5 mM), c) an equimolar mixture of **G4** and **CB[8]** (1.0 mM), and d) a mixture of **G4** (2.0 mM) and **CB[8]** (1.0 mM).

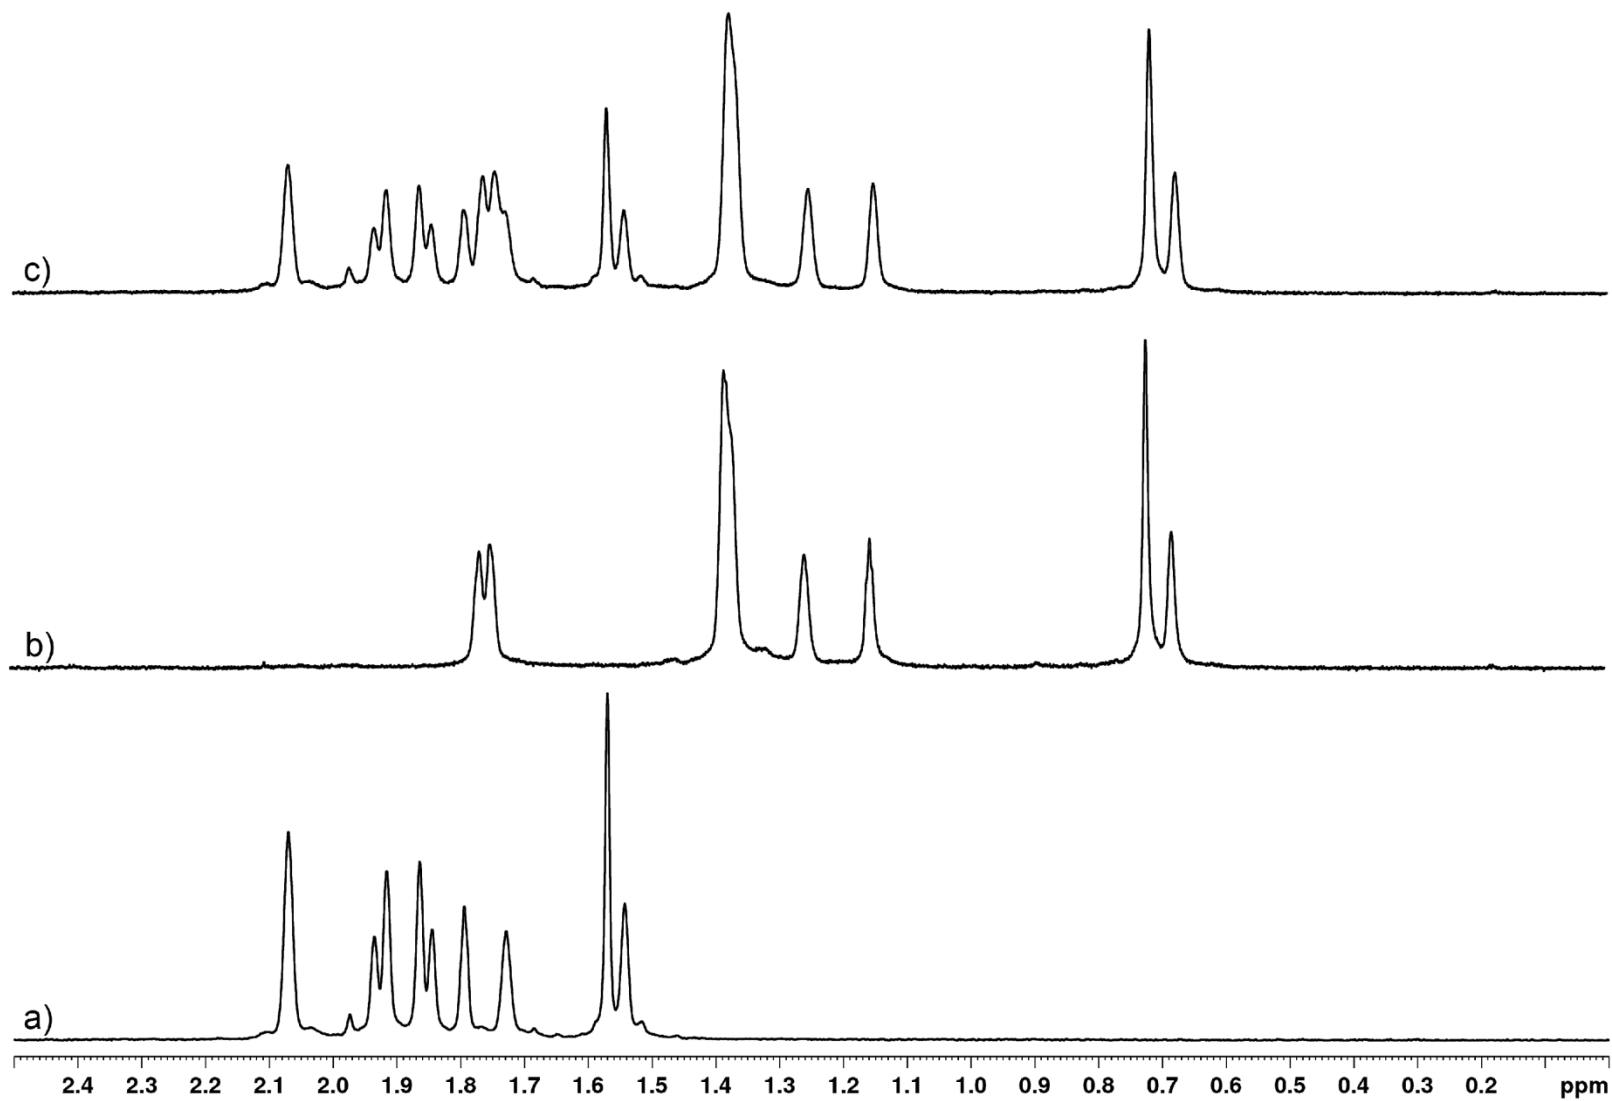

**Figure S16.** The expanded guest region for  $^1\text{H}$  NMR spectra recorded for (600 MHz, RT,  $\text{D}_2\text{O}$ ) for: a) **G4** (1.0 mM), b) an equimolar mixture of **G4** and **CB[8]** (1.0 mM), and c) a mixture of **G4** (2.0 mM) and **CB[8]** (1.0 mM).

## Determination of $K_a$ of Cucurbit[7]uril towards G1, G2 and G4 using Isothermal Titration Calorimetry (ITC).

The binding data was fitted using the single set of sites binding model in MicroCal PEAQ-ITC analysis software.

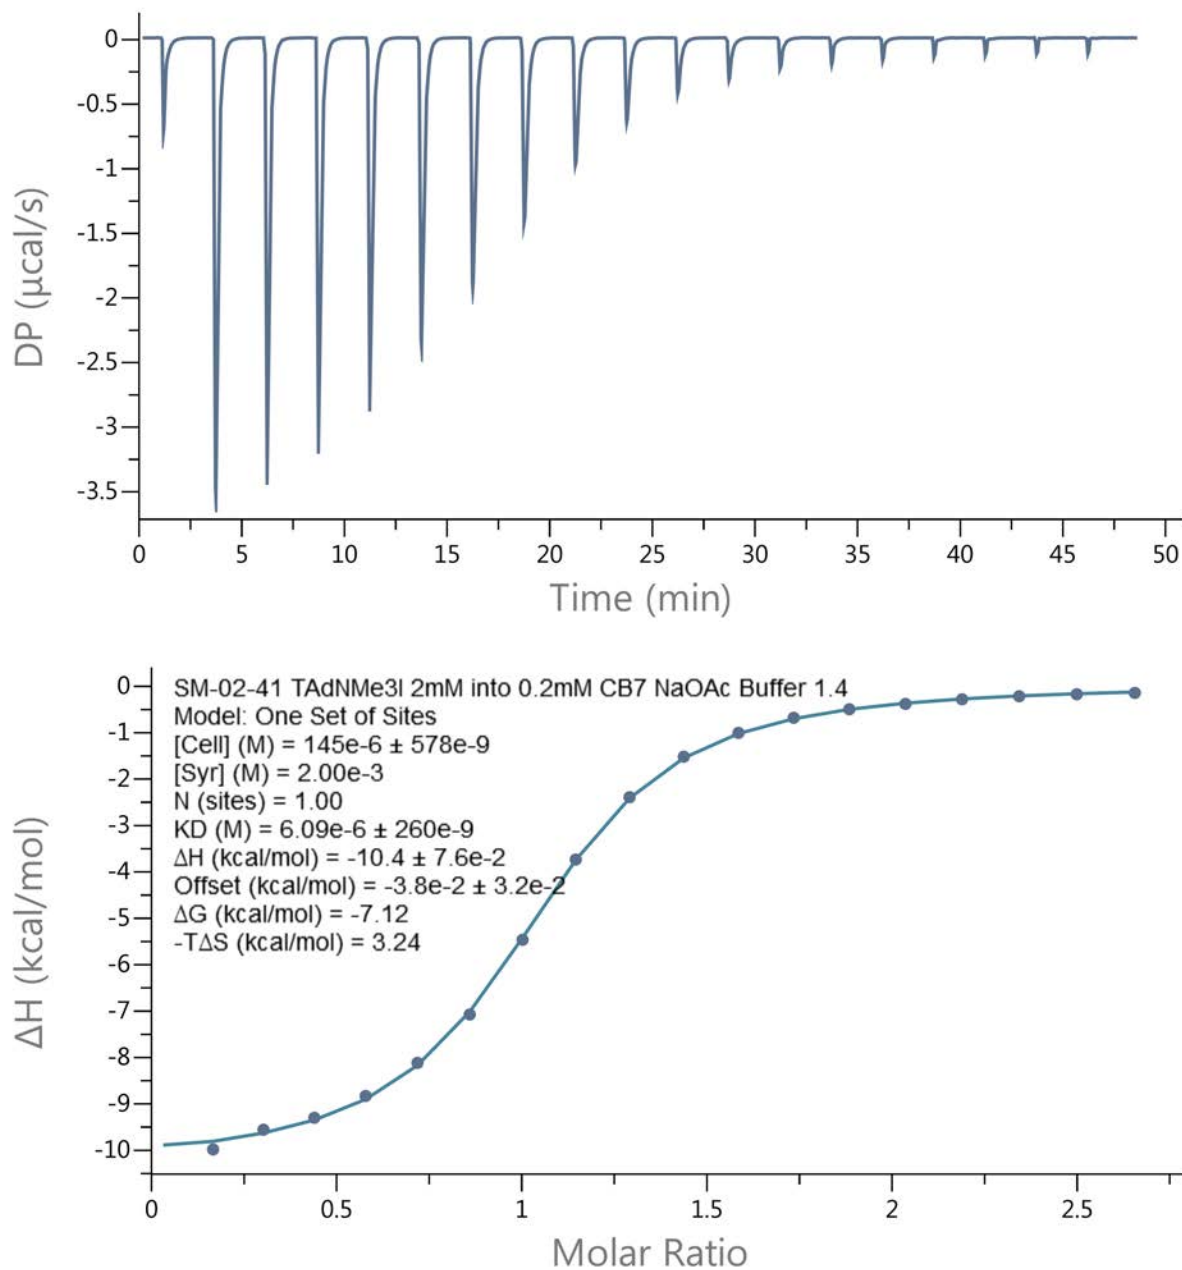

**Figure S17.** a) Plot of change in DP vs time from the titration of CB[7] (0.145 mM) with G1 (0 – 0.362 mM) in 50 mM NaOAc buffered H<sub>2</sub>O, pH = 4.74. b) Plot of the  $\Delta H$  as a function of molar ratio of CB[7]:G1. The solid line represents the best non-linear fit of the data to a 1:1 binding model ( $K_a = (1.6 \pm 0.1) \times 10^5 \text{ M}^{-1}$ ;  $\Delta H = (-10.4 \pm 0.076) \text{ kcal mol}^{-1}$ ).

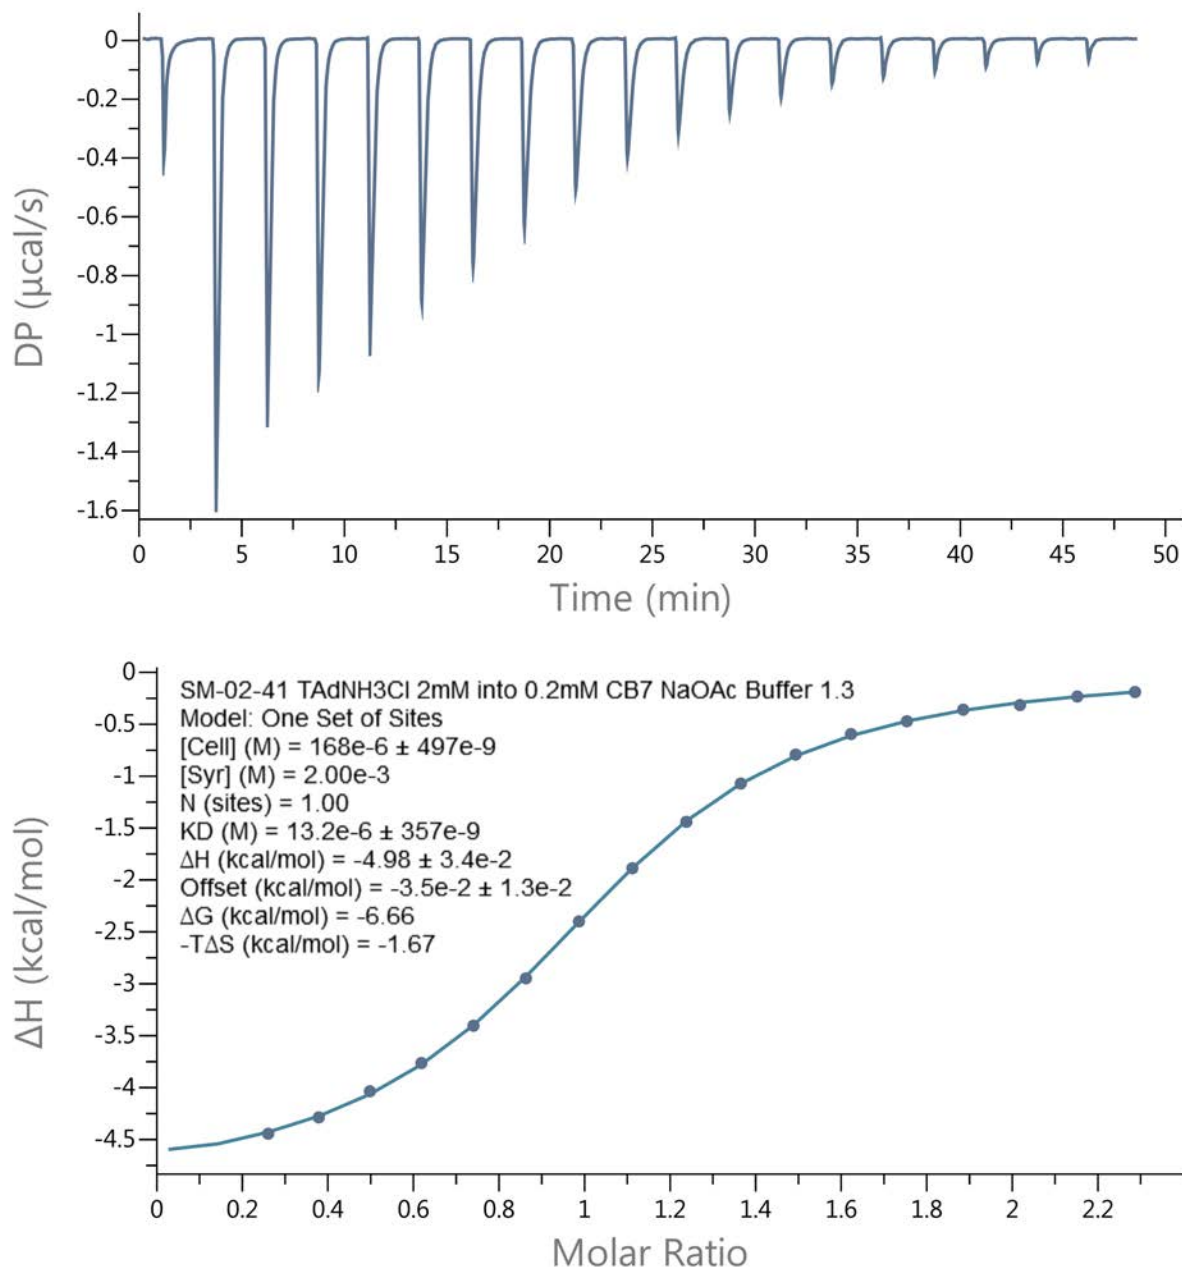

**Figure S18.** a) Plot of change in DP vs time from the titration of CB[7] (0.168 mM) and with **G2** (0 – 0.375 mM) in 50 mM NaOAc buffered  $\text{H}_2\text{O}$ , pH = 4.74. b) Plot of the  $\Delta H$  as a function of molar ratio of CB[7]•G2. The solid line represents the best non-linear fit of the data to a 1:1 binding model ( $K_a = (7.5 \pm 0.2) \times 10^4 \text{ M}^{-1}$ ;  $\Delta H = (-4.98 \pm 0.034) \text{ kcal mol}^{-1}$ ).

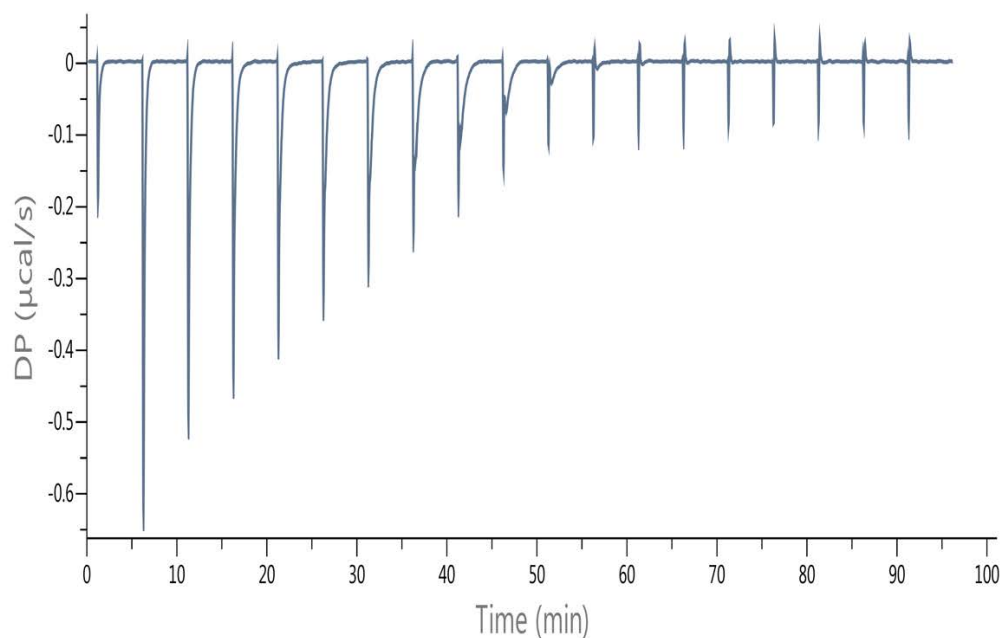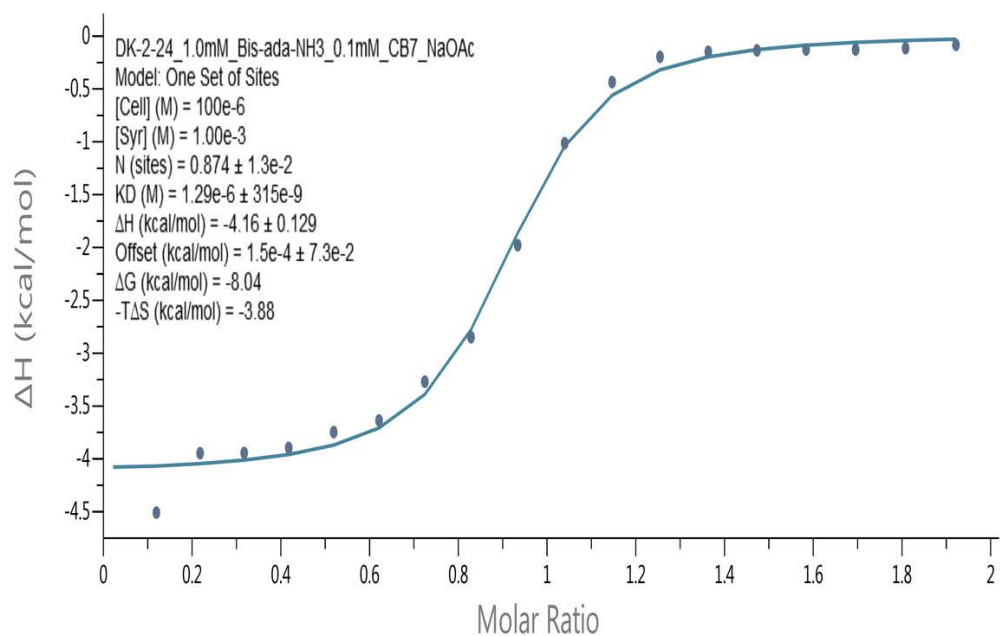

**Figure S19.** Isothermal Titration Calorimetry (ITC) curve obtained through direct binding titration studies. A solution of CB[7] (0.100 mM) in the cell was titrated with **G4** (1.00 mM) in the syringe at 298.0 K in 50 mM sodium acetate buffered water at pH 4.74.  $K_a = (7.75 \pm 1.89) \times 10^5 \text{ M}^{-1}$ . Average of 3 measurements:  $K_a = (6.73 \pm 1.41) \times 10^5 \text{ M}^{-1}$ ;  $\Delta H = (-3.79 \pm 0.10) \text{ kcal mol}^{-1}$ ;  $-T\Delta S = (-4.16 \pm 0.15 \text{ kcal mol}^{-1})$ ;  $\Delta G = (-7.96 \pm 0.11) \text{ kcal mol}^{-1}$ .

## Determination of $K_a$ of CB[7] and CB[8] towards 1, 7, and 8 using $^1\text{H}$ NMR Competition

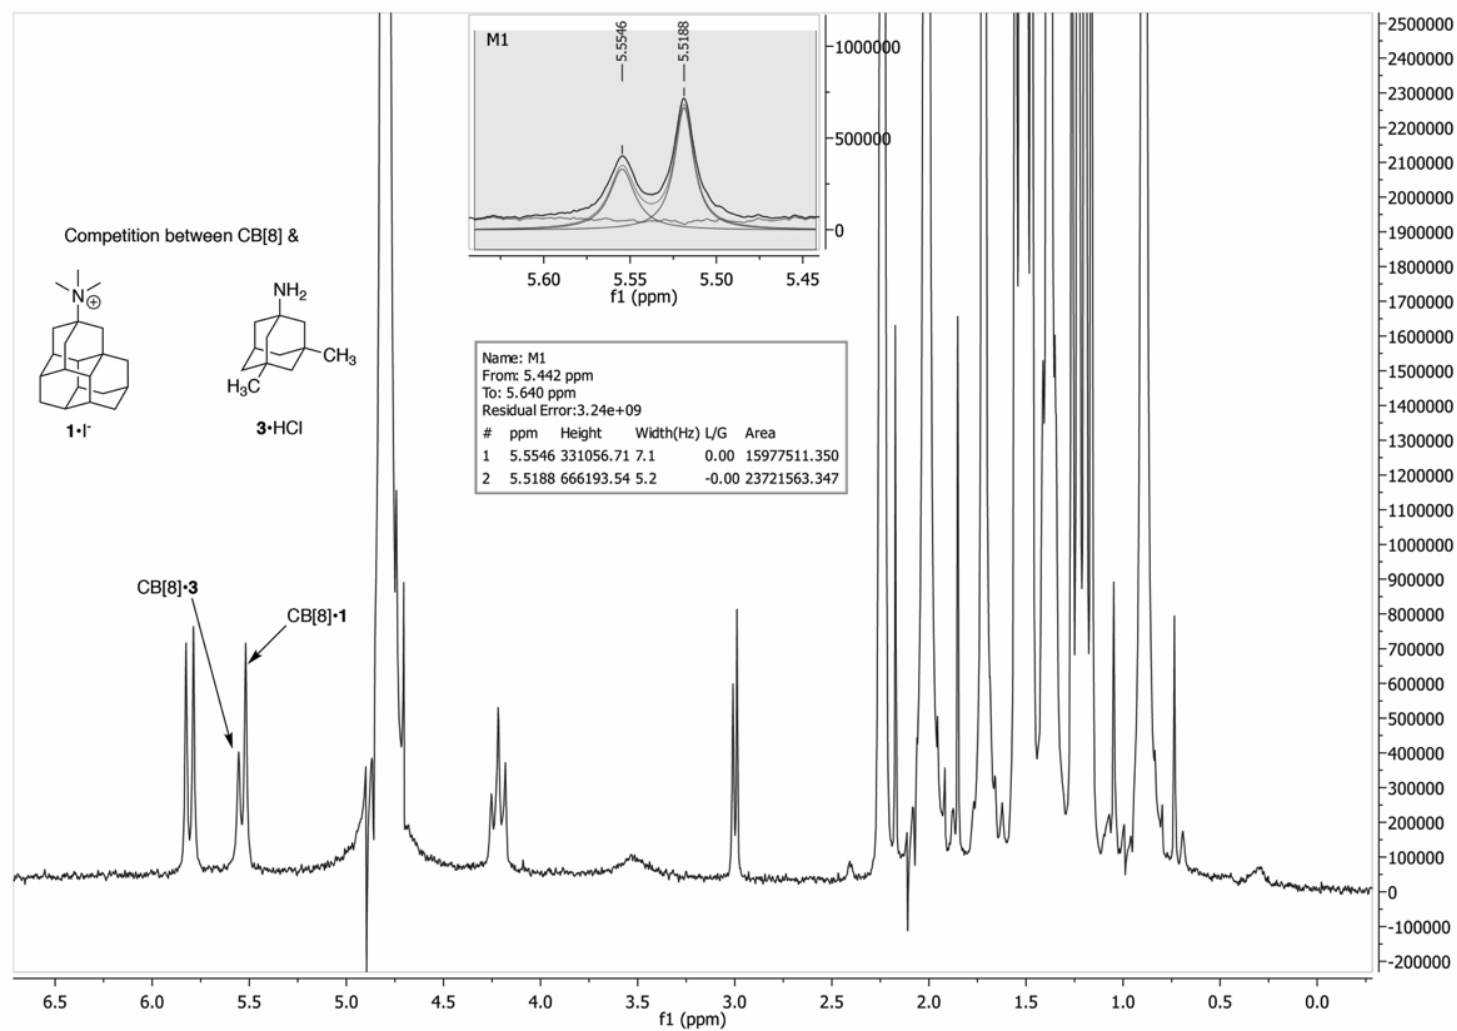

**Figure S20.**  $^1\text{H}$  NMR spectra recorded (600 MHz, RT, 50 mM NaOAc Buffered  $\text{D}_2\text{O}$ , pH = 4.74) for a competitive mixture of CB[8] (0.100 mM), C1 (16.5 mM), and G1 (0.11 mM) at equilibrium.  $K_{\text{rel}} = 493.8$  (Equilibrium was studied starting from both directions and gave the same  $K_{\text{rel}}$  value).

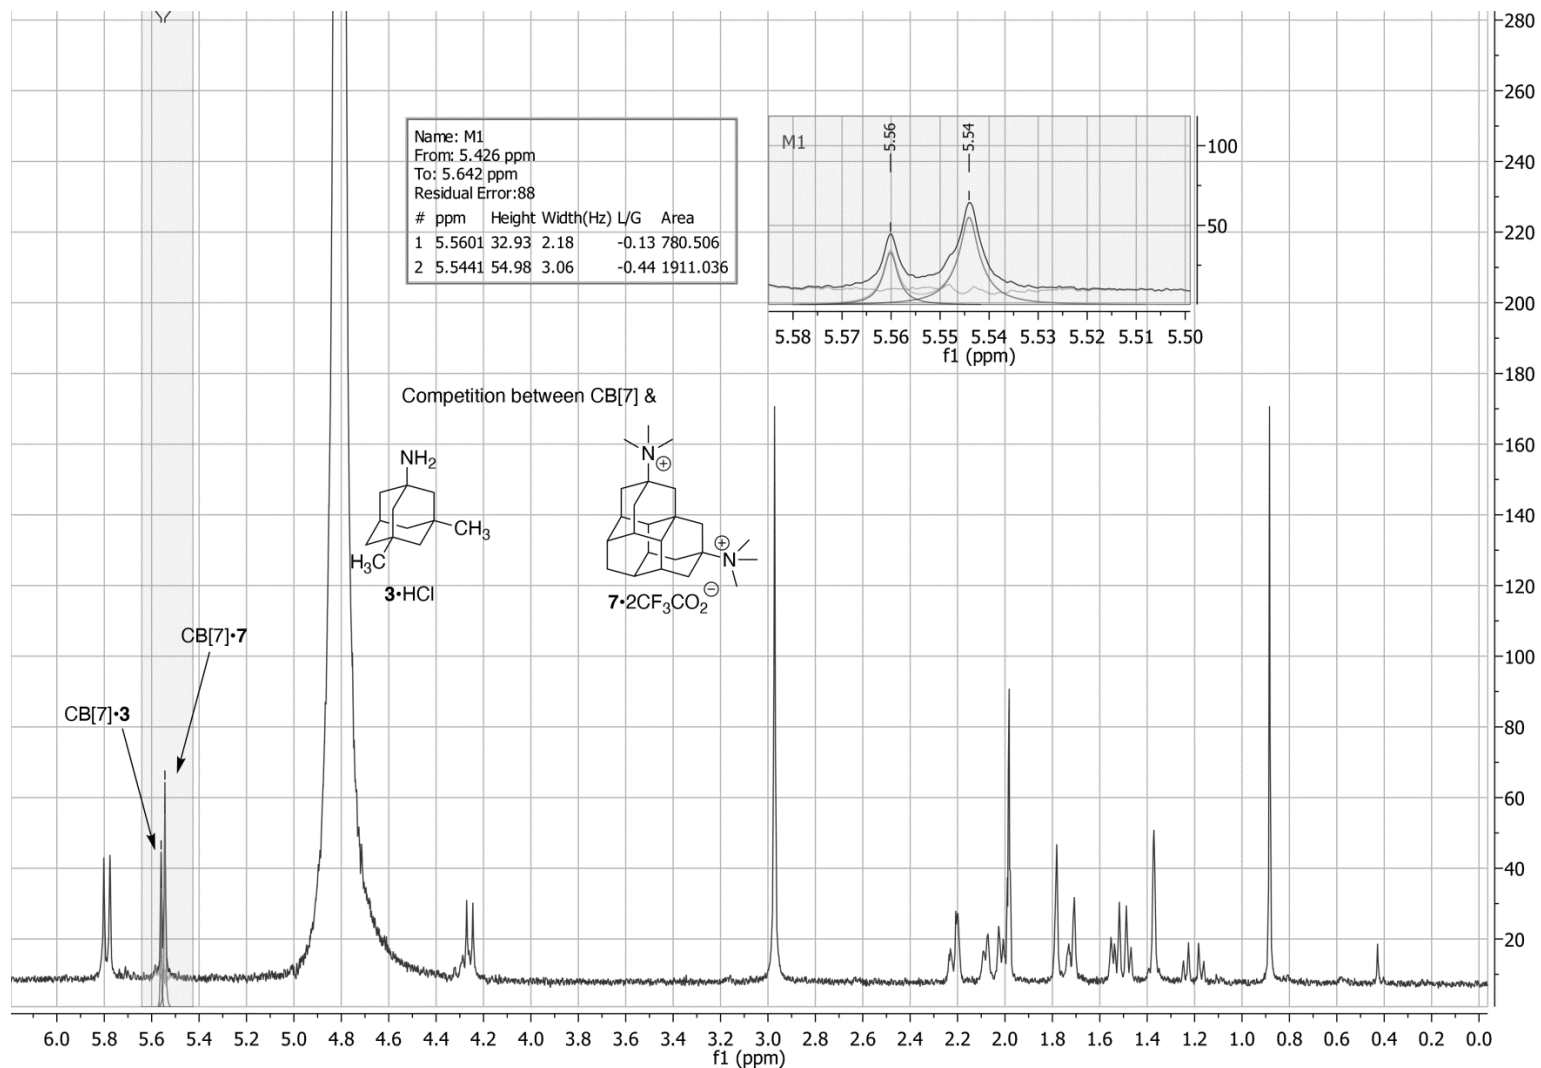

**Figure S21.**  $^1\text{H}$  NMR spectra recorded (600 MHz, RT, 50 mM NaOAc Buffered  $\text{D}_2\text{O}$ , pH = 4.74) for a competitive mixture of CB[7] (0.100 mM), C1 (0.22 mM), and G3 (0.11 mM) at equilibrium.  $K_{\text{rel}} = 11.99$  (Equilibrium was studied starting from both directions and gave the same  $K_{\text{rel}}$  value).

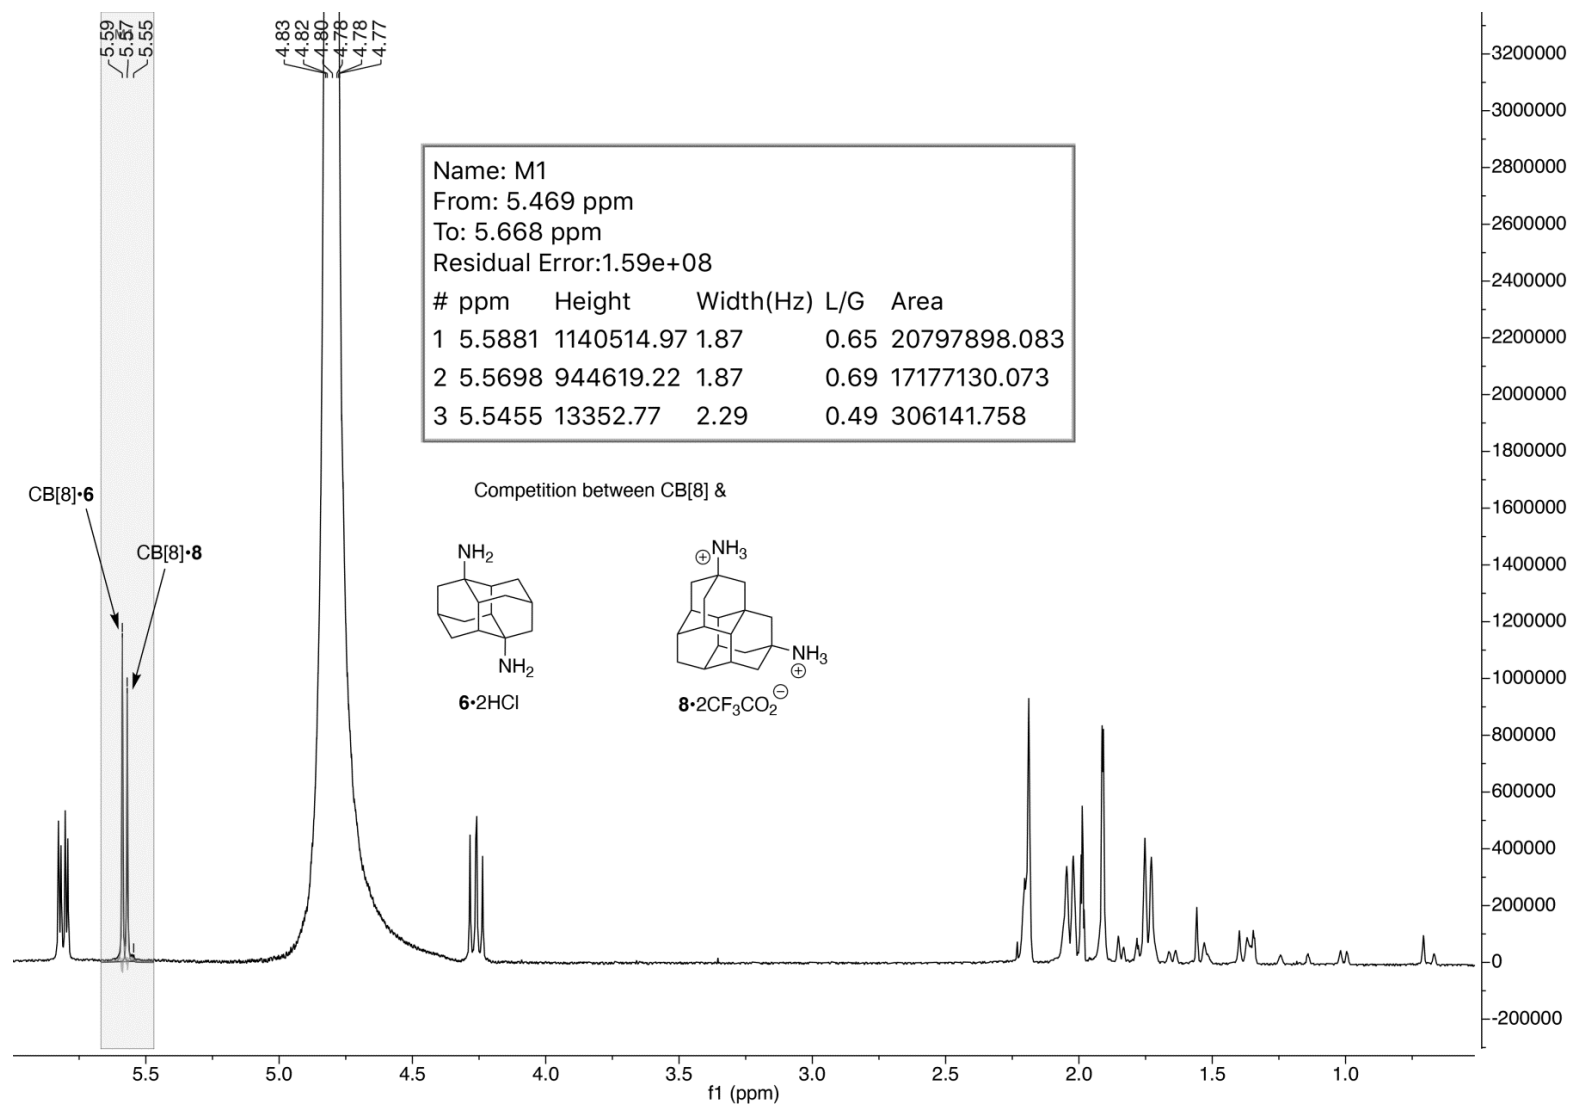

**Figure S22.** <sup>1</sup>H NMR spectra recorded (600 MHz, RT, 50 mM NaOAc Buffered D<sub>2</sub>O, pH = 4.74) for a competitive mixture of CB[8] (0.100 mM), C2 (0.33 mM), and G4 (0.11 mM) at equilibrium.  $K_{rel} = 3.46$  (Equilibrium was studied starting from both directions and gave the same  $K_{rel}$  value).



## Affinometer Output Files from the Competitive Titration of CB[8] + C3 with G3 or G4.

Experiment 1: Measuring the binding affinity of C3 and CB[8]

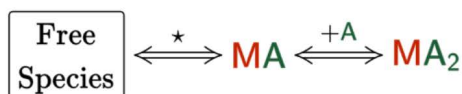

**Figure S23.** Cartoon representation of the stepwise 1:2 binding model used in Affinometer for both titrations of C3 (A) and CB[8] (M) outlined in Figures S24-S29.

### Results

- Global  $\chi^2$ : **2.76e+00**
- $\chi^2$  for curve [1]: **4.15e+00**

**Table 1:** Correction parameters<sup>†</sup> fitted parameters in blue

| $\Delta H_{\text{dil}} [\text{cal} \cdot \text{mol}^{-1}]$ | $Q_{\text{db}} [\text{cal}]$ | $r_M$     | $r_A$                        | $r_B$     |
|------------------------------------------------------------|------------------------------|-----------|------------------------------|-----------|
| <b>(1.1029 ± 0.0081)e+03</b>                               | 0.000e+00                    | 1.000e+00 | <b>(9.8192 ± 0.0309)e-01</b> | 1.000e+00 |

**Table 2:** Reaction parameters<sup>†</sup> fitted parameters in blue

| Reaction                                                                                           | K [M <sup>-n</sup> ]         | $\Delta H [\text{cal} \cdot \text{mol}^{-1}]$ |
|----------------------------------------------------------------------------------------------------|------------------------------|-----------------------------------------------|
| [1] Free species $\leftrightarrow$ M <sub>1</sub> A <sub>1</sub>                                   | <b>(2.6699 ± 0.3224)e+07</b> | <b>(-9.2300 ± 0.0419)e+03</b>                 |
| [2] M <sub>1</sub> A <sub>1</sub> + A <sub>1</sub> $\leftrightarrow$ M <sub>1</sub> A <sub>2</sub> | <b>(7.4697 ± 1.7486)e+06</b> | <b>(-8.2808 ± 0.0638)e+03</b>                 |

**Figure S24.** Results from the titration of C3 (A) titrated into CB[8] (B) as a part of the global fit for experiment 1.  $\Delta H_{\text{dil}}$  = heat of dilution;  $r_A$  = % of active C3 concentration for titration 1. Cell: CB[8] (0.02 mM); Syringe: C3 (0.350 mM); Number of Injections: 18.

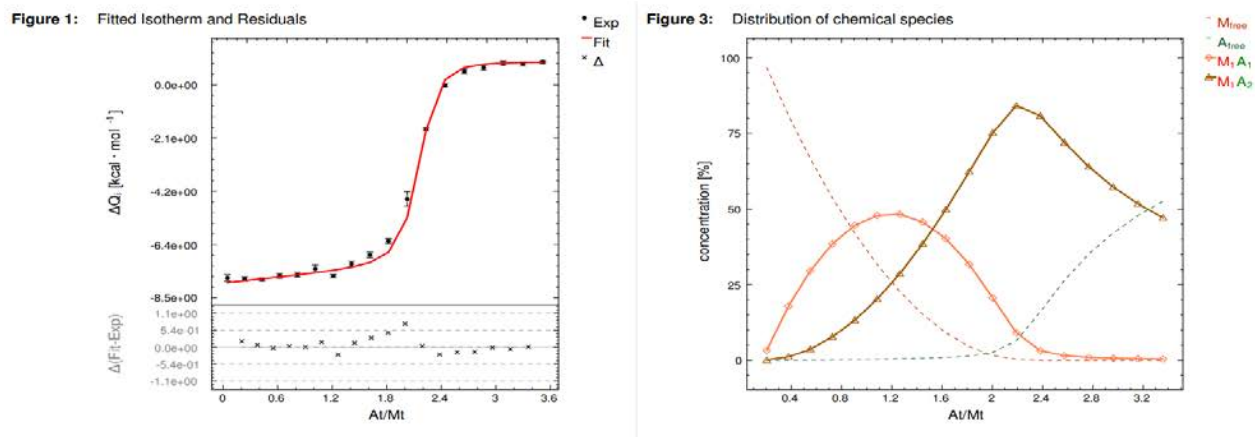

**Figure S25.** Left) Integrated signal from titration 1 and best fit line from global fit (top) and the residuals of the fit (bottom). Right) Percent concentration of each species present in the cell over time with respect to the total CB[8] concentration ( $M_{\text{free}}$ ) or total C3 concentration ( $A_{\text{free}}$ ,  $M_1A_1$ ,  $M_1A_2$ ).

Figure 2: Contributions to the Binding Isotherm

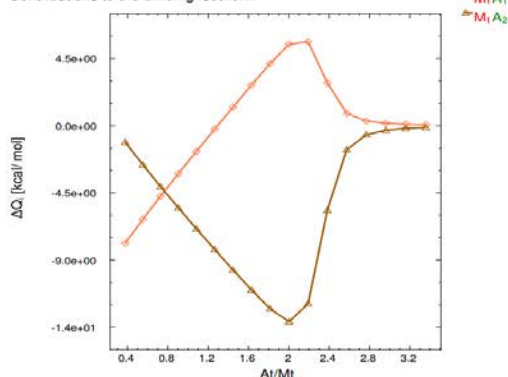

Figure 4: Thermal Footprints

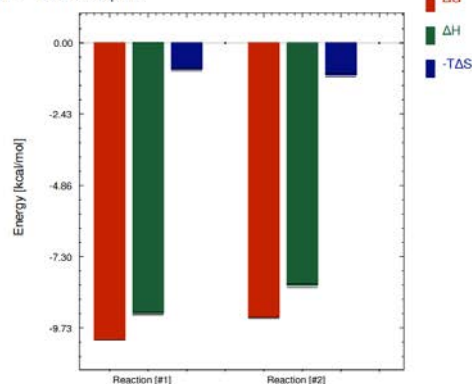

Figure S26. Left) Total contribution of each complexation reaction to the overall integrated signal over time for titration 2. Right) Graphical representation of  $\Delta G$ ,  $\Delta H$ , and  $-T\Delta S$  for each complexation reaction.

### Results

- Global  $\chi^2$ : **2.76e+00**  
 °  $\chi^2$  for curve [2]: **2.29e+00**

Table 3: Correction parameters† fitted parameters in blue

| $\Delta H_{\text{dil}} [\text{cal} \cdot \text{mol}^{-1}]$ | $Q_{\text{db}} [\text{cal}]$ | $r_M$       | $r_A$                                       | $r_B$       |
|------------------------------------------------------------|------------------------------|-------------|---------------------------------------------|-------------|
| <b><math>(-2.9819 \pm 0.0212)e+03</math></b>               | $0.000e+00$                  | $1.000e+00$ | <b><math>(1.0325 \pm 0.0023)e+00</math></b> | $1.000e+00$ |

Figure S27. Results from the titration of C3 (A) titrated into CB[8] (B) as a part of the global fit for experiment 1.  $\Delta H_{\text{dil}}$  = heat of dilution;  $r_A$  = % of active C3 concentration for titration 1. Cell: CB[8] (0.005 mM); Syringe: C3 (0.040 mM); Number of Injections: 54.

Figure 5: Fitted Isotherm and Residuals

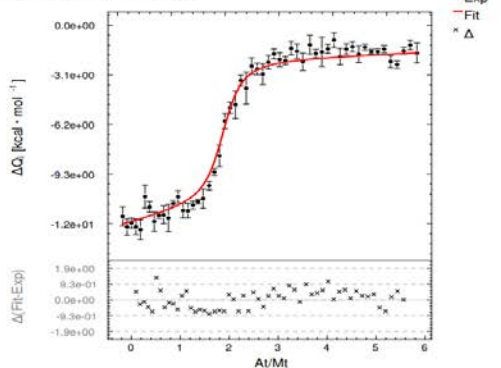

Figure 7: Distribution of chemical species

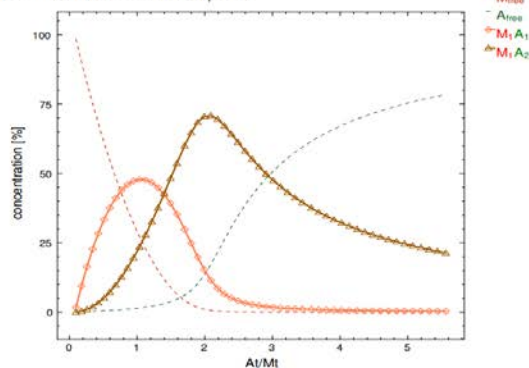

Figure S28. Left) Integrated signal from titration 2 and best fit line from global fit (top) and the residuals of the fit (bottom). Right) Percent concentration of each species present in the cell over time with respect to the total CB[8] concentration ( $M_{\text{free}}$ ) or total C3 concentration ( $A_{\text{free}}$ ,  $M_1A_1$ ,  $M_1A_2$ ).

Figure 6: Contributions to the Binding Isotherm

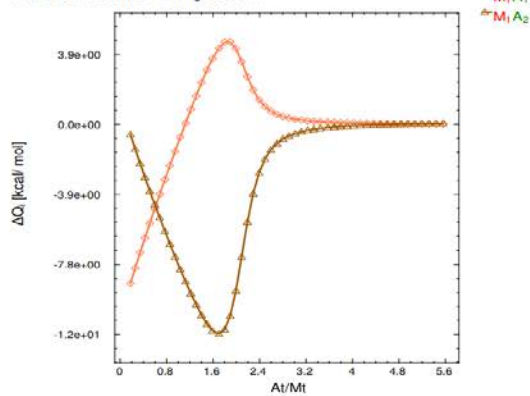

Figure 8: Thermal Footprints

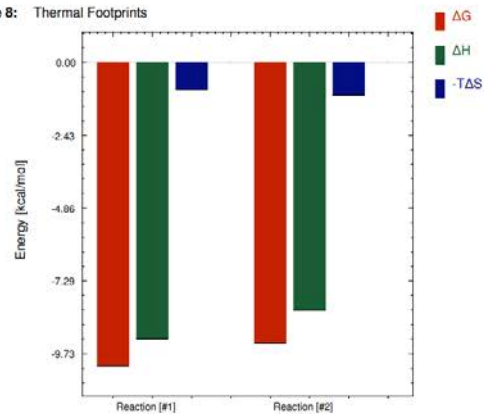

**Figure S29.** Left) Total contribution of each complexation reaction to the overall integrated signal over time for titration 2. Right) Graphical representation of  $\Delta G$ ,  $\Delta H$ , and  $-T\Delta S$  for each complexation reaction.

Experiment 2: Measuring the binding affinity of **G3** and **CB[8]** by using **C3** as a competitor.

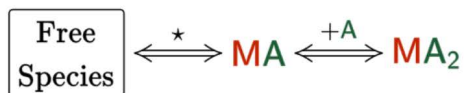

**Figure S30.** Cartoon representation of the stepwise 1:2 binding model used in Affinimeter for both titrations of **C3** (A) and **CB[8]** (M) outlined in Figures S31-S36.

### Results

- Global  $\chi^2$ : **2.81e+00**
- $\chi^2$  for curve [1]: **4.09e+00**

**Table 1:** Correction parameters† fitted parameters in blue

| $\Delta H_{\text{dil}} [\text{cal} \cdot \text{mol}^{-1}]$ | $Q_{\text{db}} [\text{cal}]$ | $r_M$     | $r_A$                        | $r_B$     |
|------------------------------------------------------------|------------------------------|-----------|------------------------------|-----------|
| <b>(1.1023 ± 0.0061)e+03</b>                               | 0.000e+00                    | 1.000e+00 | <b>(9.8076 ± 0.0224)e-01</b> | 1.000e+00 |

**Figure S31.** Results from the titration of **C3** (A) titrated into **CB[8]** (M) as a part of the global fit for experiment 2.  $\Delta H_{\text{dil}}$  = heat of dilution;  $r_A$  = % of active **C3** concentration for titration 1. Cell: **CB[8]** (0.02 mM); Syringe: **C3** (0.350 mM); Number of Injections: 18.

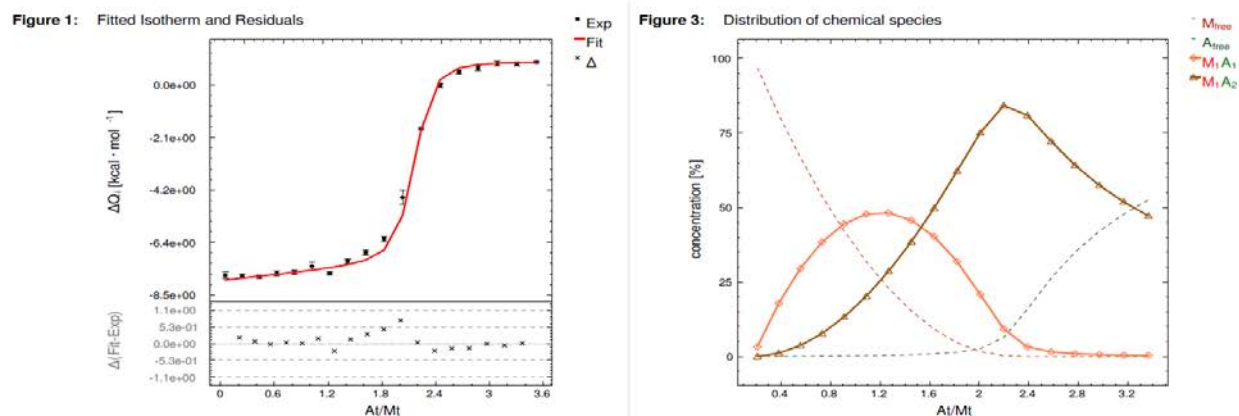

**Figure S32.** Left) Integrated signal from titration 1 and best fit line from global fit (top) and the residuals of the fit (bottom). Right) Percent concentration of each species present in the cell over time with respect to the total **CB[8]** concentration ( $M_{\text{free}}$ ) or total **C3** concentration ( $A_{\text{free}}$ ,  $M_1A_1$ ,  $M_1A_2$ ).

Figure 2: Contributions to the Binding Isotherm

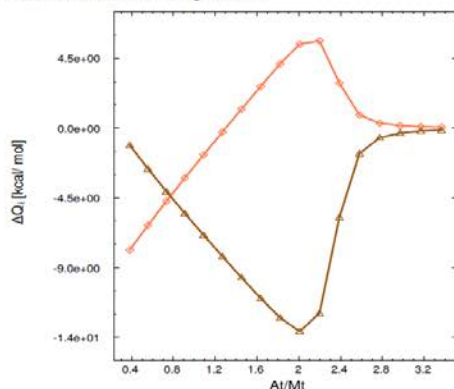

Figure 4: Thermal Footprints

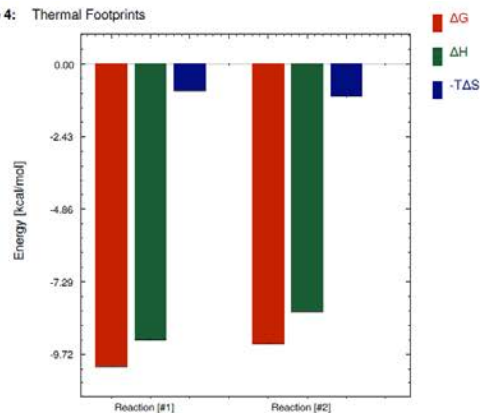

Figure S33. Left) Total contribution of each complexation reaction to the overall integrated signal over time for titration 1. Right) Graphical representation of  $\Delta G$ ,  $\Delta H$ , and  $-T\Delta S$  for each complexation reaction.

### Results

- Global  $\chi^2$ : **2.81e+00**
- $\chi^2$  for curve [2]: **2.27e+00**

Table 3: Correction parameters† fitted parameters in blue

| $\Delta H_{dil}$ [cal · mol <sup>-1</sup> ] | $Q_{db}$ [cal] | $r_M$     | $r_A$                        | $r_B$     |
|---------------------------------------------|----------------|-----------|------------------------------|-----------|
| <b>(-2.9759 ± 0.0157)e+03</b>               | 0.000e+00      | 1.000e+00 | <b>(1.0323 ± 0.0017)e+00</b> | 1.000e+00 |

Figure S34. Results from the titration of C3 (A) titrated into CB[8] (B) as a part of the global fit for experiment 2.  $\Delta H_{dil}$  = heat of dilution;  $r_A$  = % of active C3 concentration for titration 2. Cell: CB[8] (0.005 mM); Syringe: C3 (0.040 mM); Number of Injections: 54.

Figure 5: Fitted Isotherm and Residuals

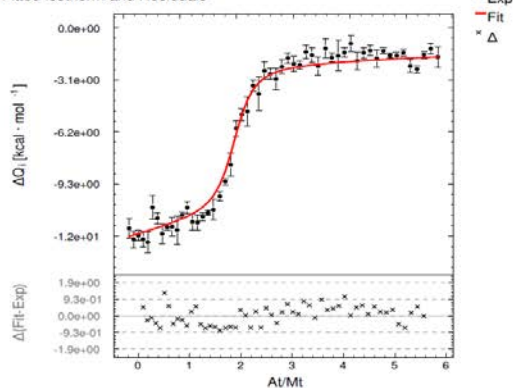

Figure 7: Distribution of chemical species

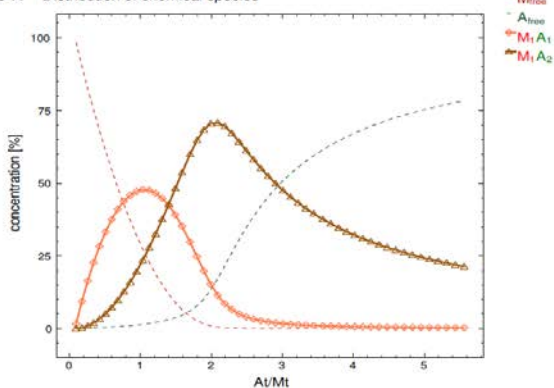

Figure S35. Left) Integrated signal from titration 2 and best fit line from global fit (top) and the residuals of the fit (bottom). Right) Percent concentration of each species present in the cell over time with respect to the total CB[8] concentration ( $M_{free}$ ) or total C3 concentration ( $A_{free}$ ,  $M_1A_1$ ,  $M_1A_2$ ).

Figure 6: Contributions to the Binding Isotherm

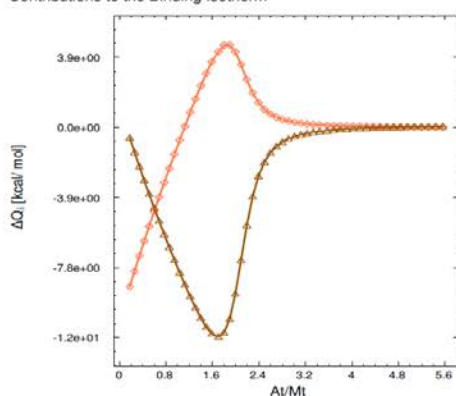

Figure 8: Thermal Footprints

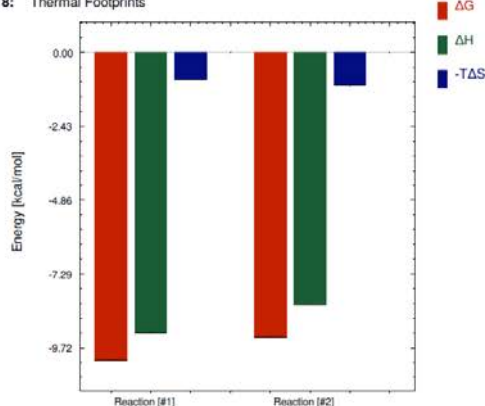

**Figure S36.** Left) Total contribution of each complexation reaction to the overall integrated signal over time for titration 2. Right) Graphical representation of  $\Delta G$ ,  $\Delta H$ , and  $-T\Delta S$  for each complexation reaction.

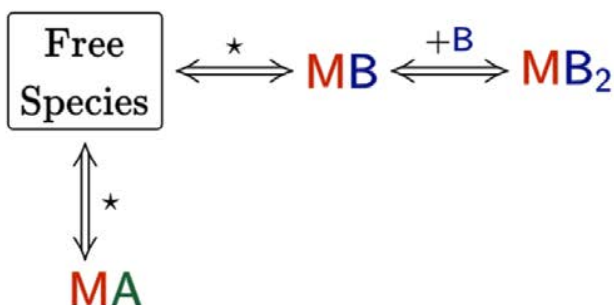

**Figure S37.** Cartoon representation of the stepwise competition binding model used in Affinometer for the titration of **G3** (A) into a mixture of **CB[8]** (M) and **C3** (B) outlined in Figures S41-S43.

### Results

- Global  $\chi^2$ : **2.81e+00**
- o  $\chi^2$  for curve [3]: **2.93e+00**

Table 5: Correction parameters<sup>†</sup> fitted parameters in blue

| $\Delta H_{dil}$ [cal·mol <sup>-1</sup> ] | $Q_{db}$ [cal] | $r_M$     | $r_A$                 | $r_B$                 |
|-------------------------------------------|----------------|-----------|-----------------------|-----------------------|
| (-8.3660 ± 0.1136)e+02                    | 0.000e+00      | 1.000e+00 | (8.5858 ± 0.0145)e-01 | (1.4040 ± 0.0115)e+00 |

Table 6: Reaction parameters<sup>†</sup> fitted parameters in blue

| Reaction                                                                                              | K [M <sup>-n</sup> ]  | $\Delta H$ [cal·mol <sup>-1</sup> ] |
|-------------------------------------------------------------------------------------------------------|-----------------------|-------------------------------------|
| [1] Free species $\rightleftharpoons$ M <sub>1</sub> B <sub>1</sub>                                   | (2.6496 ± 0.2385)e+07 | (-9.2416 ± 0.0310)e+03              |
| [2] M <sub>1</sub> B <sub>1</sub> + B <sub>1</sub> $\rightleftharpoons$ M <sub>1</sub> B <sub>2</sub> | (7.4659 ± 1.2976)e+06 | (-8.2917 ± 0.0472)e+03              |
| [3] Free species $\rightleftharpoons$ M <sub>1</sub> A <sub>1</sub>                                   | (1.1486 ± 0.1689)e+13 | (-1.0076 ± 0.0045)e+04              |

**Figure S38.** Results from the titration of **G3** (A) into a mixture of **CB[8]** (M) and **C3** (B) as a part of the global fit for experiment 2.  $\Delta H_{dil}$  = heat of dilution;  $r_A$  = % of active **C3** concentration for titration 3. Cell: **CB[8]** (0.030 mM), **C3** (0.175 mM); Syringe: **G3** (0.100 mM); Number of Injections: 54.

Figure 9: Fitted Isotherm and Residuals

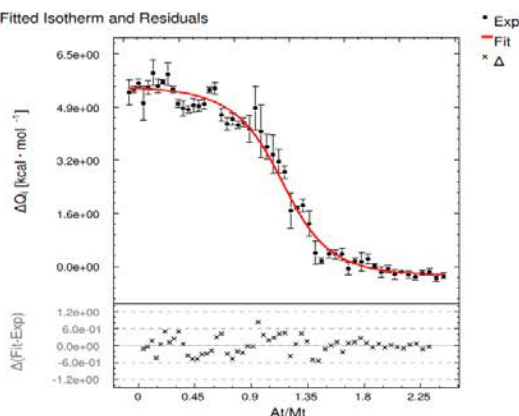

Figure 11: Distribution of chemical species

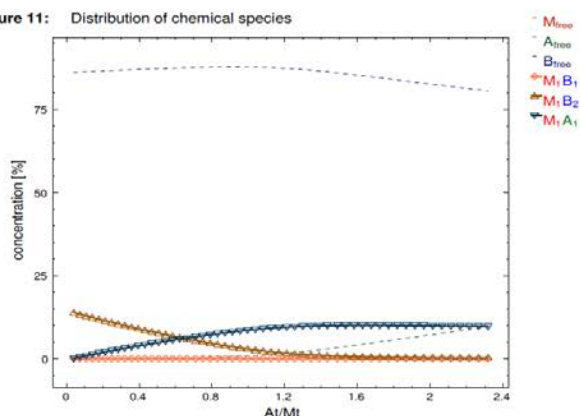

Figure S39. Left) Integrated signal from titration 3 and best fit line from global fit (top) and the residuals of the fit (bottom). Right) Percent concentration of each species present in the cell over time with respect to the total CB[8] concentration ( $M_{\text{free}}$ ), total C3 concentration ( $B_{\text{free}}$ ,  $M_1B_1$ ,  $M_1B_2$ ), or total G3 concentration ( $A_{\text{free}}$ ,  $M_1A_1$ ).

Figure 10: Contributions to the Binding Isotherm

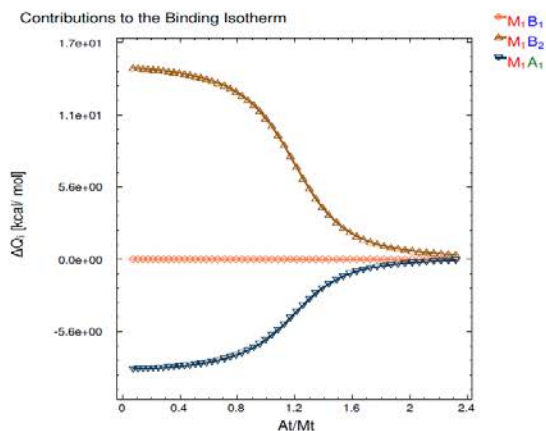

Figure 12: Thermal Footprints

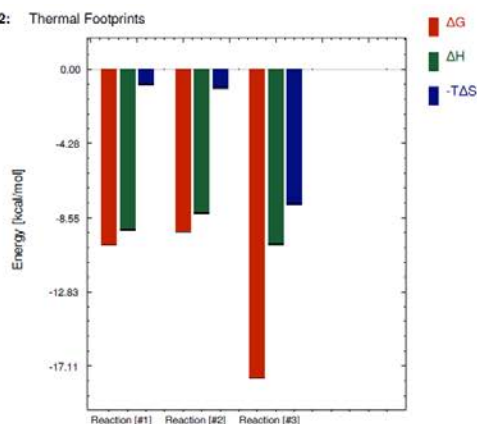

Figure S40. Left) Total contribution of each complexation reaction to the overall integrated signal over time for titration 3. Right) Graphical representation of  $\Delta G$ ,  $\Delta H$ , and  $-T\Delta S$  for each complexation reaction.

Experiment 3: Measuring the binding affinity of **G4** and **CB[8]** by using **C3** as a competitor

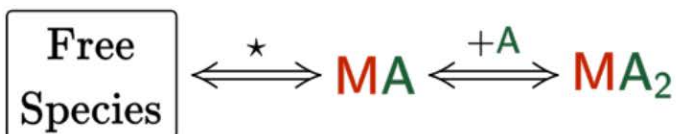

**Figure S41.** Cartoon representation of the stepwise 1:2 binding model used in Affinimeter for both titrations of **C3** (A) and **CB[8]** (M) outlined in Figures S42-S47.

### Results

- Global  $\chi^2$ : **3.98e+00**
- $\chi^2$  for curve [3]: **1.22e+01**

**Table 5:** Correction parameters† fitted parameters in blue

| $\Delta H_{\text{dil}} [\text{cal} \cdot \text{mol}^{-1}]$ | $Q_{\text{db}} [\text{cal}]$ | $r_M$       | $r_A$                                       | $r_B$       |
|------------------------------------------------------------|------------------------------|-------------|---------------------------------------------|-------------|
| <b><math>(1.4547 \pm 0.0191)e+03</math></b>                | $0.000e+00$                  | $1.000e+00$ | <b><math>(9.7919 \pm 0.0324)e-01</math></b> | $1.000e+00$ |

**Figure S42.** Results from the titration of **C3** (A) titrated into **CB[8]** (B) as a part of the global fit for experiment 3.  $\Delta H_{\text{dil}}$  = heat of dilution;  $r_A$  = % of active **C3** concentration for titration 1. Cell: **CB[8]** (0.02 mM); Syringe: **C3** (0.350 mM); Number of Injections: 18.

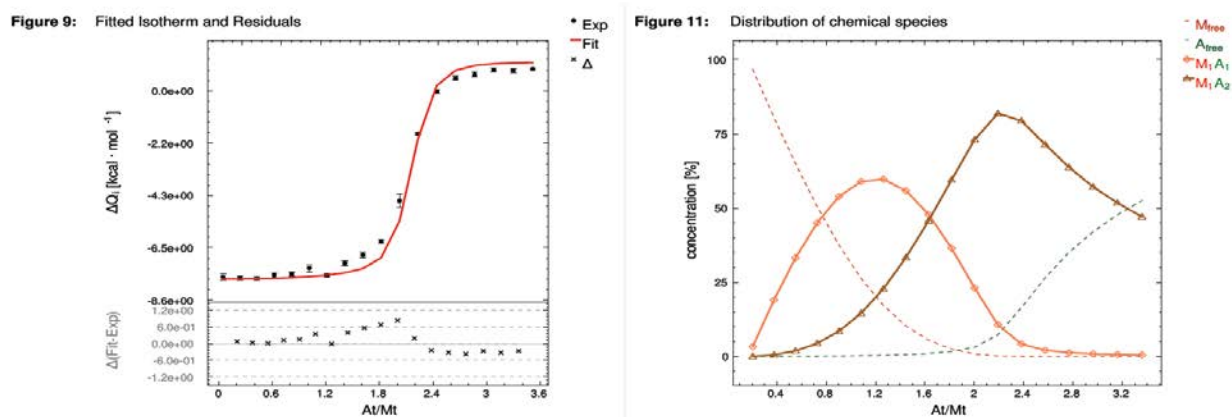

**Figure S43.** Left) Integrated signal from titration 1 and best fit line from global fit (top) and the residuals of the fit (bottom). Right) Percent concentration of each species present in the cell over time with respect to the total **CB[8]** concentration ( $M_{\text{free}}$ ) or total **C3** concentration ( $A_{\text{free}}$ ,  $M_1A_1$ ,  $M_1A_2$ ).



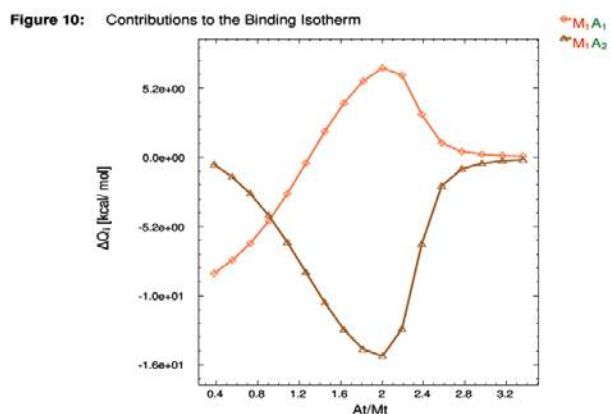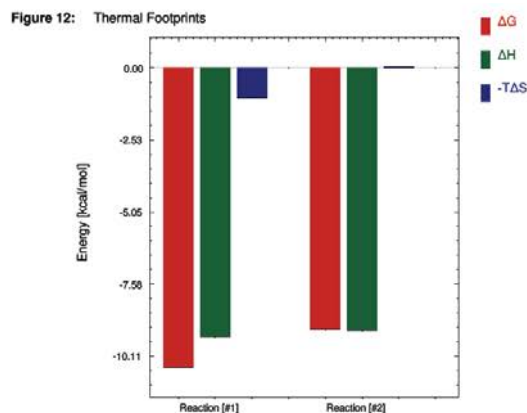

**Figure S44.** Left) Total contribution of each complexation reaction to the overall integrated signal over time for titration 1. Right) Graphical representation of  $\Delta G$ ,  $\Delta H$ , and  $-T\Delta S$  for each complexation reaction.

### Results

- Global  $\chi^2$ :  $3.98e+00$

**Table 3:** Correction parameters <sup>f</sup> fitted parameters in blue

| $\Delta H_{dil} [\text{cal} \cdot \text{mol}^{-1}]$ | $Q_{db} [\text{cal}]$ | $r_M$       | $r_A$                     | $r_B$       |
|-----------------------------------------------------|-----------------------|-------------|---------------------------|-------------|
| $(-2.7148 \pm 0.0169)e+03$                          | $0.000e+00$           | $1.000e+00$ | $(1.0176 \pm 0.0017)e+00$ | $1.000e+00$ |

**Figure S45.** Results from the titration of **C3** (A) titrated into CB[8] (B) as a part of the global fit for experiment 3.  $\Delta H_{dil}$  = heat of dilution;  $r_A$  = % of active **C3** concentration for titration 2. Cell: CB[8] (0.005 mM); Syringe: **C3** (0.040 mM); Number of Injections: 54.

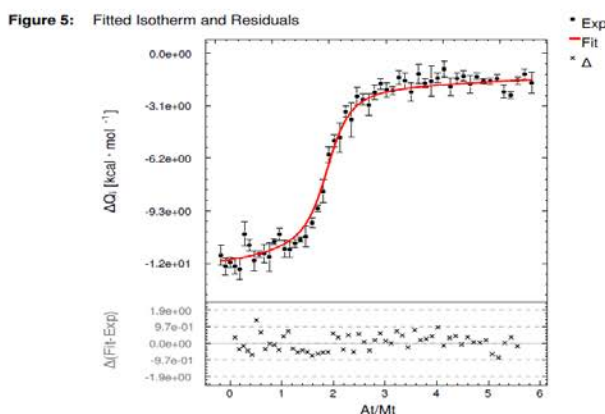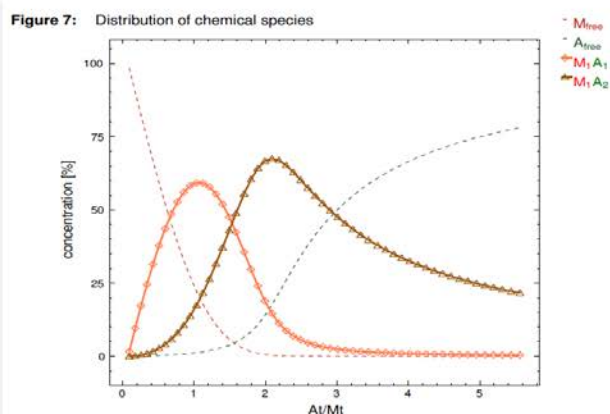

**Figure S46.** Left) Integrated signal from titration 2 and best fit line from global fit (top) and the residuals of the fit (bottom). Right) Percent concentration of each species present in the cell over time with respect to the total CB[8] concentration ( $M_{free}$ ) or total **C3** concentration ( $A_{free}$ ,  $M_1A_1$ ,  $M_1A_2$ ).

Figure 6: Contributions to the Binding Isotherm

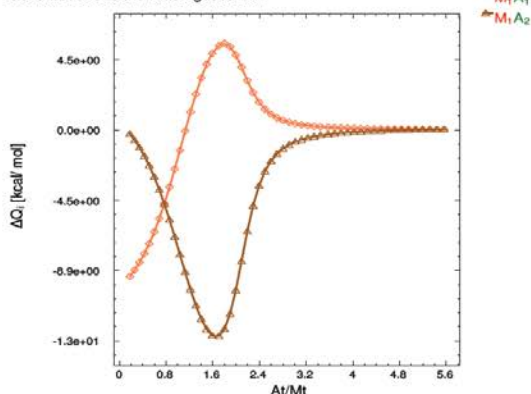

Figure 8: Thermal Footprints

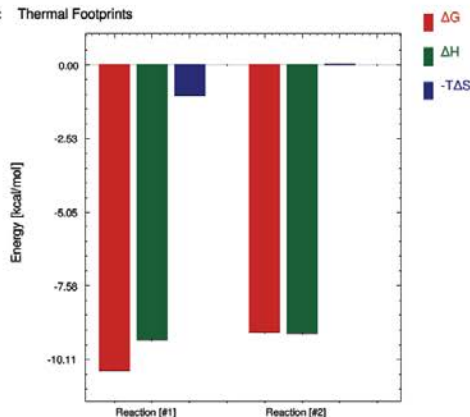

Figure S47. Left) Total contribution of each complexation reaction to the overall integrated signal over time for titration 2. Right) Graphical representation of  $\Delta G$ ,  $\Delta H$ , and  $-T\Delta S$  for each complexation reaction.

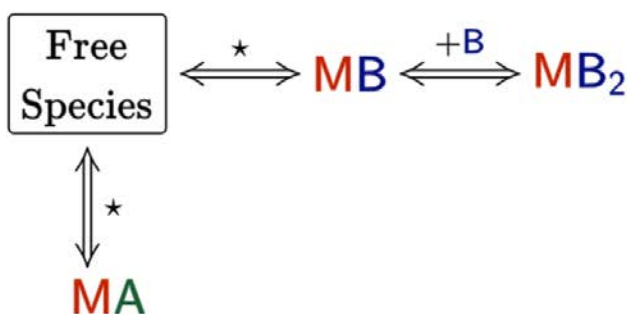

Figure S48. Cartoon representation of the stepwise competition binding model used in Affinometer for the titration of G4 (A) into a mixture of CB[8] (M) and C3 (B) outlined in Figures S52-S57.

### Results

- Global  $\chi^2$ :  $3.98e+00$
- o  $\chi^2$  for curve [1]:  $4.38e+00$

Table 1: Correction parameters <sup>†</sup> fitted parameters in blue

| $\Delta H_{\text{dil}} [\text{cal} \cdot \text{mol}^{-1}]$ | $Q_{\text{db}} [\text{cal}]$ | $r_M$       | $r_A$                     | $r_B$                     |
|------------------------------------------------------------|------------------------------|-------------|---------------------------|---------------------------|
| $(-1.4297 \pm 0.0316)e+03$                                 | $0.000e+00$                  | $1.000e+00$ | $(9.2598 \pm 0.0330)e-01$ | $(1.0598 \pm 0.0060)e+00$ |

Table 2: Reaction parameters <sup>†</sup> fitted parameters in blue

| Reaction                                     | $K [\text{M}^{-n}]$       | $\Delta H [\text{cal} \cdot \text{mol}^{-1}]$ |
|----------------------------------------------|---------------------------|-----------------------------------------------|
| [1] Free species $\rightleftharpoons M_1B_1$ | $(4.9349 \pm 0.3942)e+07$ | $(-9.4436 \pm 0.0416)e+03$                    |
| [2] $M_1B_1 + B_1 \rightleftharpoons M_1B_2$ | $(5.4213 \pm 0.6600)e+06$ | $(-9.2195 \pm 0.0661)e+03$                    |
| [3] Free species $\rightleftharpoons M_1A_1$ | $(1.1418 \pm 0.2161)e+14$ | $(-1.1501 \pm 0.0050)e+04$                    |

Figure S49. Results from the titration of G4 (A) into a mixture of CB[8] (M) and C3 (B) as a part of the global fit for experiment 3.  $\Delta H_{\text{dil}}$  = heat of dilution;  $r_A$  = % of active C3 concentration for titration 3. Cell: CB[8] (0.020 mM), C3 (0.015 mM); Syringe: G4 (0.070 mM); Number of Injections: 54.

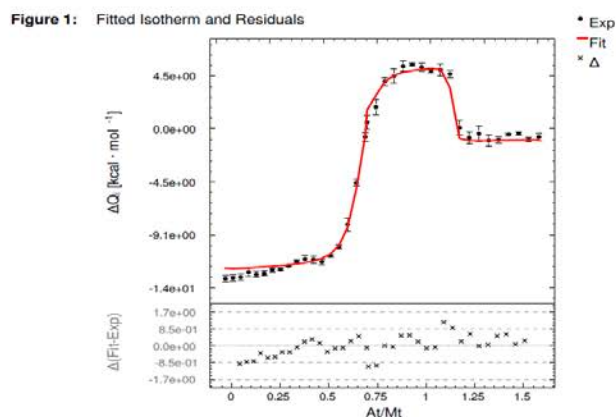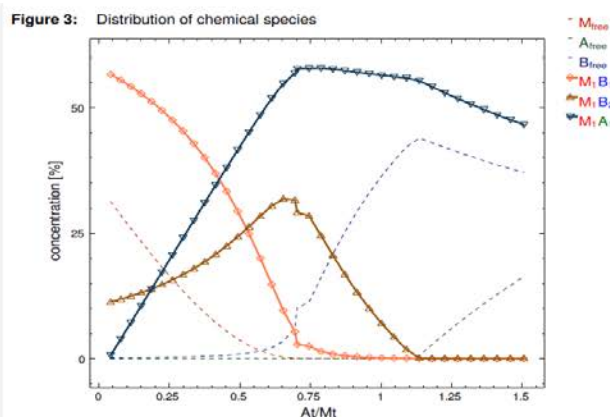

**Figure S50.** Left) Integrated signal from titration 3 and best fit line from global fit (top) and the residuals of the fit (bottom). Right) Percent concentration of each species present in the cell over time with respect to the total CB[8] concentration ( $M_{\text{free}}$ ), total C3 concentration ( $B_{\text{free}}$ ,  $M_1B_1$ ,  $M_1B_2$ ), or total G4 concentration ( $A_{\text{free}}$ ,  $M_1A_1$ ).

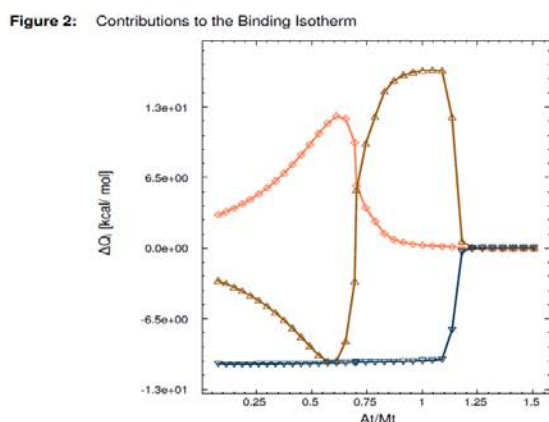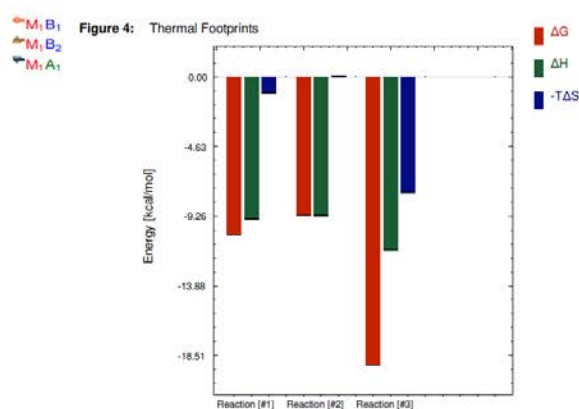

**Figure S51.** Left) Total contribution of each complexation reaction to the overall integrated signal over time for titration 3. Right) Graphical representation of  $\Delta G$ ,  $\Delta H$ , and  $-T\Delta S$  for each complexation reaction.

## Results

- Global  $\chi^2$ :  $3.98e+00$
- $\chi^2$  for curve [4]:  $2.68e+00$

**Table 7: Correction parameters** <sup>f</sup> fitted parameters in blue

| $\Delta H_{\text{dil}} [\text{cal} \cdot \text{mol}^{-1}]$ | $Q_{\text{dB}} [\text{cal}]$ | $r_M$       | $r_A$                     | $r_B$                     |
|------------------------------------------------------------|------------------------------|-------------|---------------------------|---------------------------|
| $(-4.8798 \pm 0.0191)e+02$                                 | $0.000e+00$                  | $1.000e+00$ | $(7.9695 \pm 0.0300)e-01$ | $(8.8648 \pm 0.0244)e-01$ |

**Figure S52.** Results from the titration of G4 (A) into a mixture of CB[8] (M) and C3 (B) as a part of the global fit for experiment 3.  $\Delta H_{\text{dil}}$  = heat of dilution;  $r_A$  = % of active C3 concentration for titration 4. Cell: CB[8] (0.020 mM), C3 (0.040 mM); Syringe: G4 (0.150 mM); Number of Injections: 54.

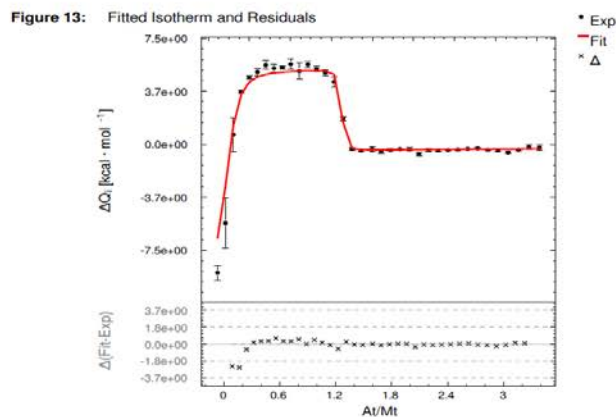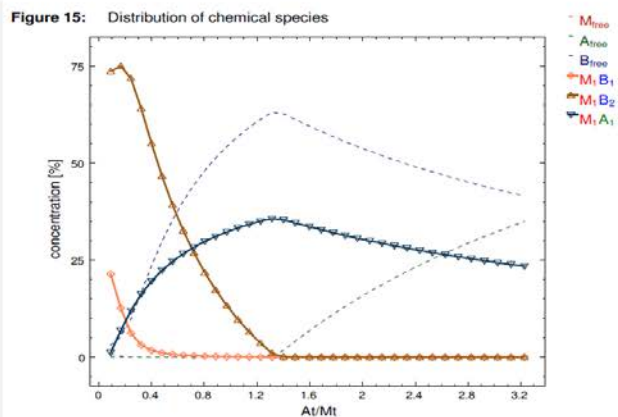

**Figure S53.** Left) Integrated signal from titration 4 and best fit line from global fit (top) and the residuals of the fit (bottom). Right) Percent concentration of each species present in the cell over time with respect to the total CB[8] concentration ( $M_{\text{free}}$ ), total C3 concentration ( $B_{\text{free}}$ ,  $M_1B_1$ ,  $M_1B_2$ ), or total G4 concentration ( $A_{\text{free}}$ ,  $M_1A_1$ ).

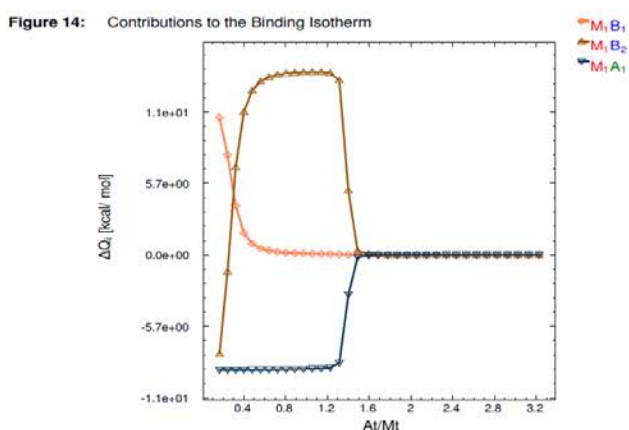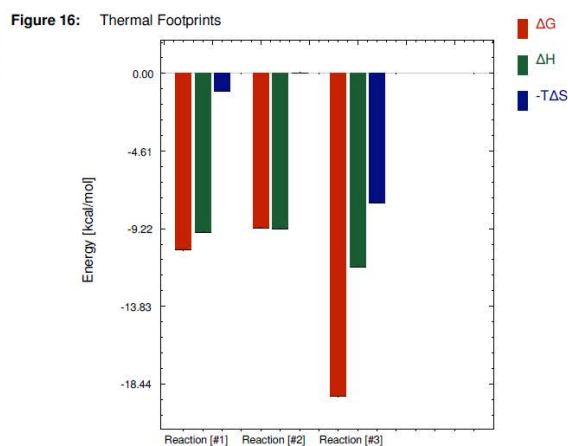

**Figure S54.** Left) Total contribution of each complexation reaction to the overall integrated signal over time for titration 4. Right) Graphical representation of  $\Delta G$ ,  $\Delta H$ , and  $-T\Delta S$  for each complexation reaction.

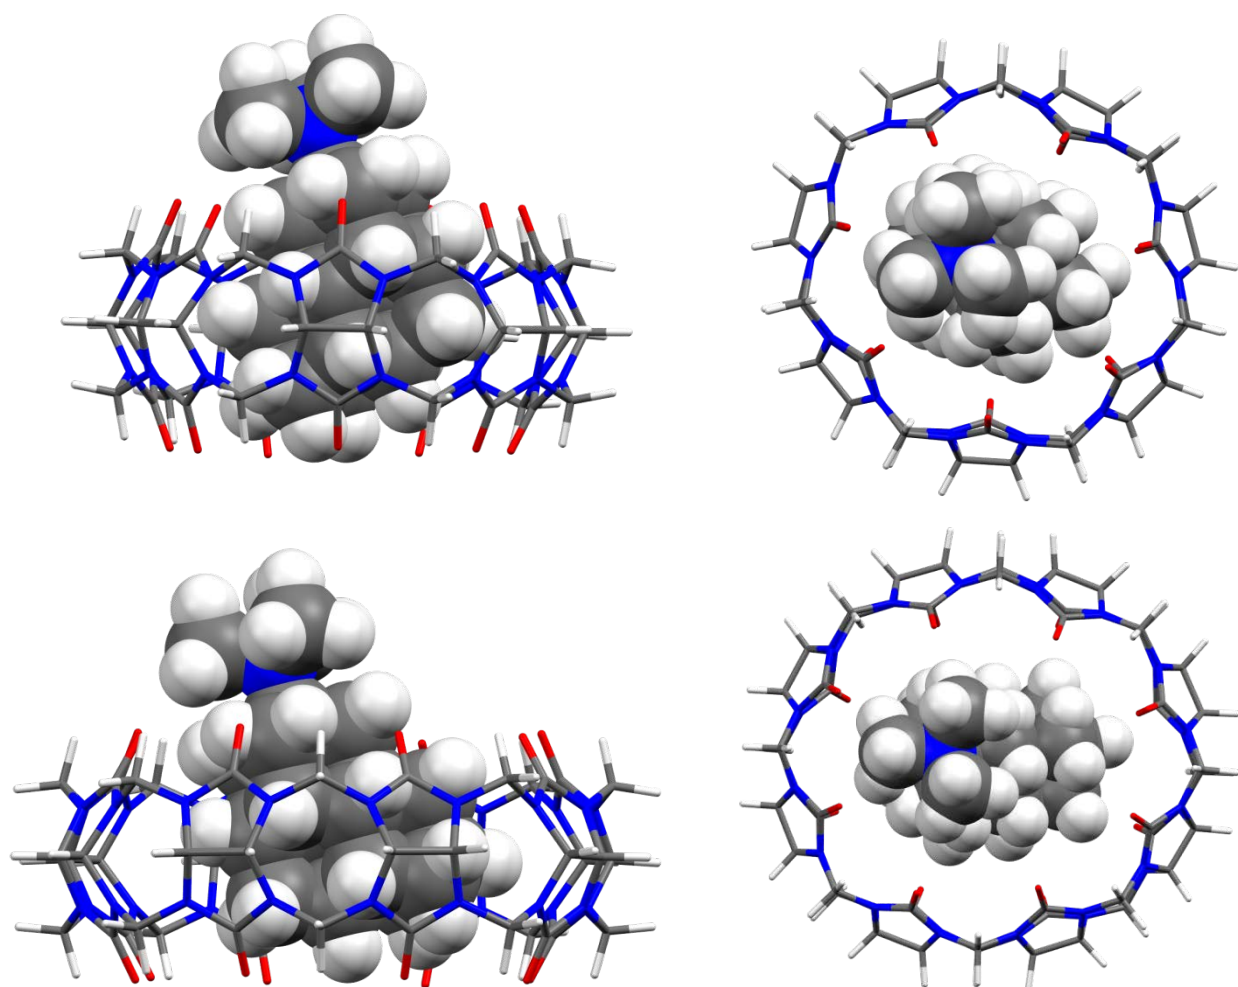

**Figure S55.** Representations of the minimized geometries of CB[7]•G1 (top) and CB[8]•G1 (bottom). Color coding: C, gray; H, white; O, red; N, blue.

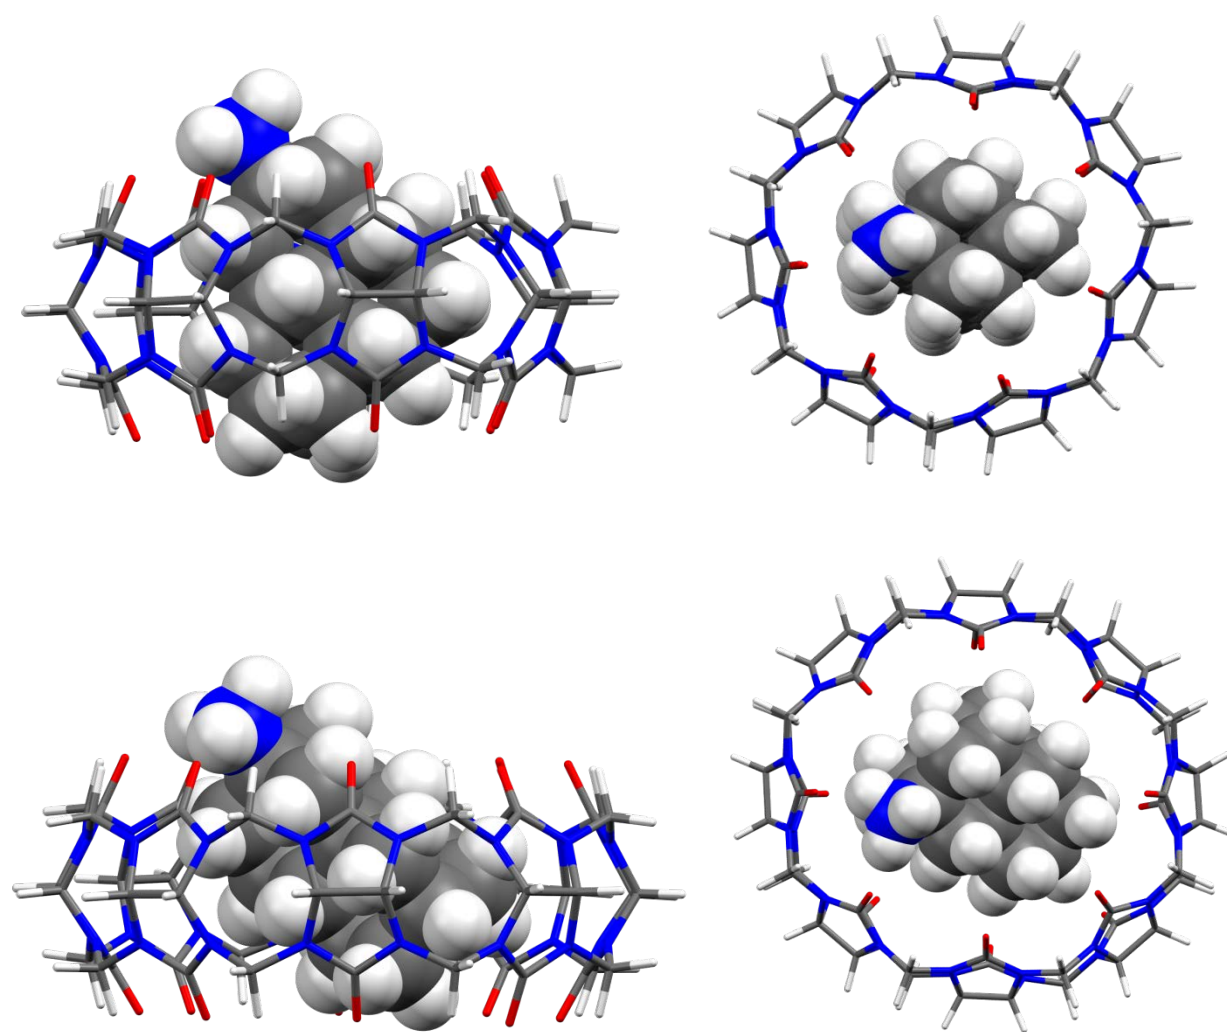

**Figure S56.** Representations of the minimized geometries of CB[7]•G2 (top) and CB[8]•G2 (bottom). Color coding: C, gray; H, white; O, red; N, blue.

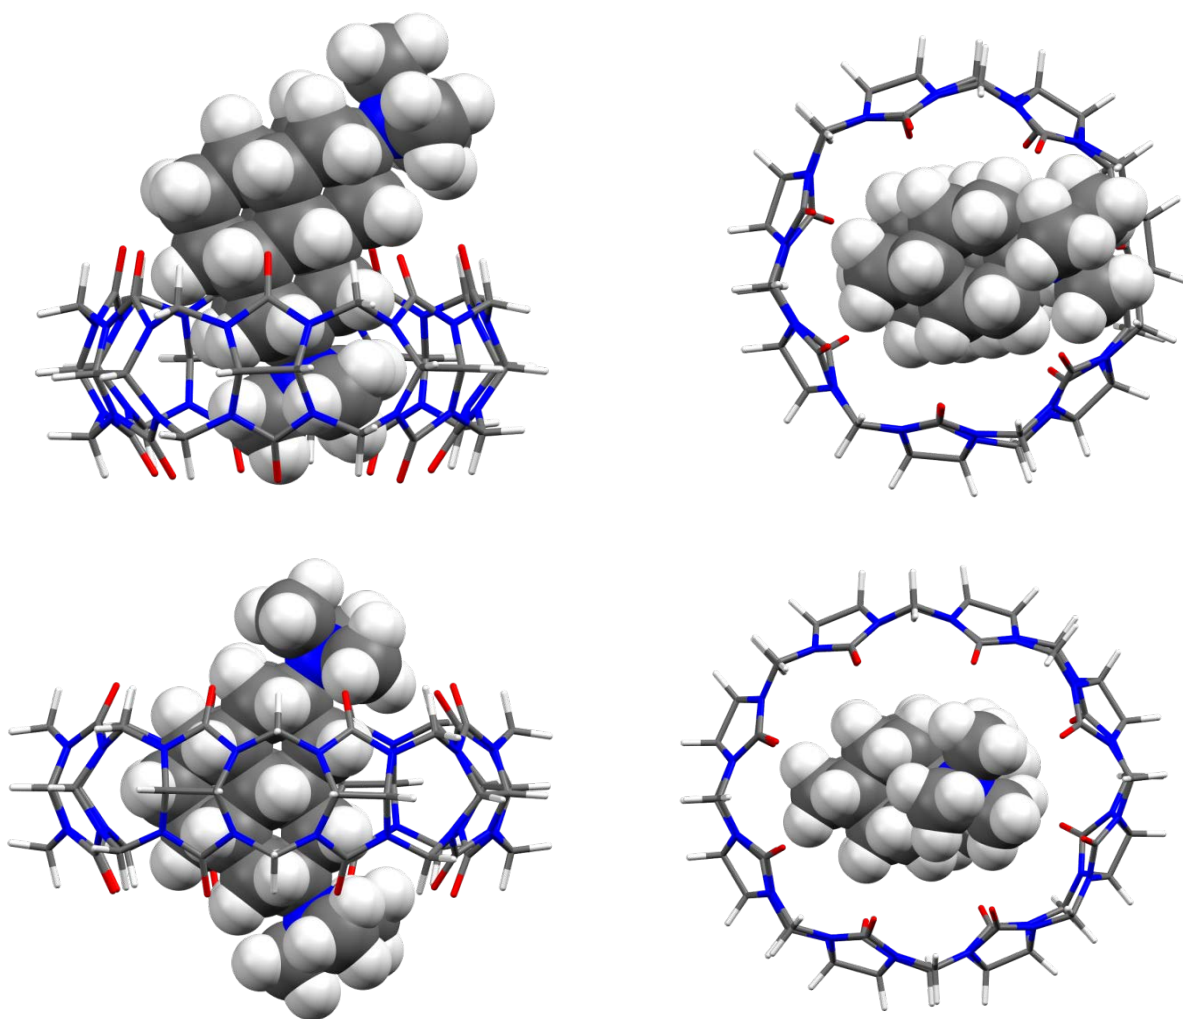

**Figure S57.** Representations of the minimized geometries of CB[7]•G3 (top) and CB[8]•G3 (bottom). Color coding: C, gray; H, white; O, red; N, blue.

**Table S1.** Electronic energies, zero-point vibrational energies, enthalpies and Gibbs energies of guests **G1–G4**, CB[7] and CB[8], and the corresponding complexes in Hartree computed using the GFN2-xTB method. The interaction energies (difference between the energy of the complex and the energy of the guest and the host molecules) for the complexes in kcal mol<sup>-1</sup> are given in parentheses.

| compound                  | <i>E</i>                   | <i>ZPVE</i> | <i>H</i>                   | <i>G</i>                   |
|---------------------------|----------------------------|-------------|----------------------------|----------------------------|
| <b>G1</b>                 | -64.055694                 | 0.495235    | -63.544051                 | -63.599693                 |
| <b>G2</b>                 | -54.570637                 | 0.410876    | -54.146303                 | -54.196330                 |
| <b>G3</b>                 | -77.160562                 | 0.607646    | -76.531822                 | -76.595677                 |
| <b>G4</b>                 | -58.192044                 | 0.438754    | -57.738041                 | -57.790919                 |
| <b>CB[7]</b>              | -251.174100                | 0.923189    | -250.186362                | -250.339766                |
| <b>CB[8]</b>              | -287.050977                | 1.055132    | -285.921884                | -286.093340                |
| <b>CB[7]•G1</b>           | -315.272746 <b>(-27.0)</b> | 1.424573    | -313.767545 <b>(-23.3)</b> | -313.947474 <b>(-5.0)</b>  |
| <b>CB[7]•G2</b>           | -305.783942 <b>(-24.6)</b> | 1.339440    | -304.367502 <b>(-21.9)</b> | -304.540738 <b>(-2.9)</b>  |
| <b>CB[7]•G3 unstable</b>  | -328.322615 <b>(7.6)</b>   | 1.539372    | -326.698337 <b>(12.5)</b>  | -326.884910 <b>(31.7)</b>  |
| <b>CB[7]•G3 exclusion</b> | -328.361297 <b>(-16.7)</b> | 1.535884    | -326.738713 <b>(-12.9)</b> | -326.931129 <b>(2.7)</b>   |
| <b>CB[7]•G4</b>           | -309.422823 <b>(-35.6)</b> | 1.369077    | -307.975832 <b>(-32.3)</b> | -308.149194 <b>(-11.6)</b> |
| <b>CB[8]•G1</b>           | -351.159698 <b>(-33.3)</b> | 1.554003    | -349.514316 <b>(-30.4)</b> | -349.717460 <b>(-15.3)</b> |
| <b>CB[8]•G2</b>           | -341.674384 <b>(-33.1)</b> | 1.469324    | -340.117704 <b>(-31.1)</b> | -340.312876 <b>(-14.6)</b> |
| <b>CB[8]•G3</b>           | -364.265517 <b>(-33.9)</b> | 1.668273    | -362.501204 <b>(-29.8)</b> | -362.711852 <b>(-14.3)</b> |
| <b>CB[8]•G4</b>           | -345.307439 <b>(-40.4)</b> | 1.497598    | -343.720905 <b>(-38.3)</b> | -343.919089 <b>(-21.9)</b> |



**Table S2.** Geometries of guests **G1–G4**, CB[7] and CB[8], and the corresponding complexes in Cartesian coordinates in Å obtained using the GFN2-xTB method and from CREST sampling.

| <b>G1</b> |              |              |              |
|-----------|--------------|--------------|--------------|
| 6         | -1.977600000 | 1.142300000  | -1.092500000 |
| 6         | -2.723300000 | -0.191200000 | -1.083800000 |
| 6         | -2.329800000 | -0.945200000 | 0.185500000  |
| 6         | -2.345300000 | 1.970300000  | 0.143000000  |
| 6         | -0.451700000 | 0.935200000  | 1.381700000  |
| 6         | -2.699500000 | -0.131100000 | 1.429700000  |
| 6         | -1.959800000 | 1.213700000  | 1.421500000  |
| 6         | -2.356600000 | -1.009200000 | -2.318900000 |
| 6         | -0.090100000 | 0.056100000  | -2.359900000 |
| 6         | -0.852200000 | -1.270500000 | -2.331200000 |
| 6         | -0.444400000 | -2.043100000 | -1.074900000 |
| 6         | 1.060900000  | -2.303100000 | -1.079100000 |
| 6         | 1.805300000  | -0.969100000 | -1.106000000 |
| 6         | 1.416000000  | -0.199200000 | -2.367000000 |
| 6         | -0.473600000 | 0.874900000  | -1.126100000 |
| 6         | 1.431500000  | -0.150200000 | 0.128600000  |
| 6         | -0.827600000 | -1.222500000 | 0.157900000  |
| 6         | -0.077200000 | 0.111500000  | 0.140000000  |
| 7         | -2.327200000 | 2.043800000  | 2.676200000  |
| 1         | 2.885400000  | -1.153500000 | -1.109400000 |
| 1         | -2.260900000 | 1.707700000  | -1.986800000 |
| 1         | -3.803800000 | -0.009700000 | -1.085200000 |
| 1         | -2.869400000 | -1.897900000 | 0.220500000  |
| 1         | -1.813900000 | 2.917700000  | 0.070500000  |
| 1         | -3.417000000 | 2.157700000  | 0.102800000  |
| 1         | -0.133000000 | 0.365100000  | 2.253200000  |
| 1         | 0.119000000  | 1.861600000  | 1.336300000  |
| 1         | -3.778700000 | 0.011400000  | 1.417600000  |
| 1         | -2.427200000 | -0.725100000 | 2.300500000  |
| 1         | -2.897100000 | -1.958800000 | -2.311900000 |
| 1         | -2.645700000 | -0.469200000 | -3.223800000 |
| 1         | -0.366900000 | 0.611100000  | -3.264300000 |
| 1         | -0.592000000 | -1.858100000 | -3.219200000 |
| 1         | -0.976700000 | -3.001600000 | -1.052700000 |
| 1         | 1.332400000  | -2.898300000 | -1.954200000 |
| 1         | 1.344400000  | -2.872400000 | -0.190700000 |
| 1         | 1.955800000  | 0.749900000  | -2.408000000 |
| 1         | 1.690900000  | -0.774900000 | -3.254000000 |
| 1         | 0.065800000  | 1.828700000  | -1.159000000 |
| 1         | 1.724500000  | -0.695400000 | 1.028700000  |
| 1         | 1.976300000  | 0.796600000  | 0.115400000  |
| 1         | -0.544300000 | -1.786600000 | 1.054200000  |
| 6         | -1.627500000 | 3.345100000  | 2.699800000  |
| 6         | -3.775400000 | 2.331100000  | 2.740000000  |

  

| <b>G2</b> |              |             |             |
|-----------|--------------|-------------|-------------|
| 6         | -1.971300000 | 1.339900000 | 3.925700000 |
| 1         | -0.903500000 | 1.155100000 | 3.976500000 |
| 1         | -2.508100000 | 0.400900000 | 4.008900000 |
| 1         | -2.246900000 | 1.962600000 | 4.773500000 |
| 1         | -4.094300000 | 2.911900000 | 1.881100000 |
| 1         | -3.981800000 | 2.911900000 | 3.635900000 |
| 1         | -4.351300000 | 1.413400000 | 2.793300000 |
| 1         | -1.895600000 | 3.946000000 | 1.837500000 |
| 1         | -0.551900000 | 3.206900000 | 2.727500000 |
| 1         | -1.921300000 | 3.888700000 | 3.594600000 |

|   |              |              |              |   |              |              |              |
|---|--------------|--------------|--------------|---|--------------|--------------|--------------|
| 1 | 0.070300000  | 1.831200000  | -1.156200000 | 1 | -0.545500000 | -1.795400000 | 1.042900000  |
| 1 | 1.736300000  | -0.701300000 | 1.022400000  | 6 | -1.584200000 | 3.331000000  | 2.691900000  |
| 1 | 1.988300000  | 0.790400000  | 0.109100000  | 6 | -3.738500000 | 2.328800000  | 2.741400000  |
| 1 | -0.540500000 | -1.786400000 | 1.058300000  | 6 | -1.932800000 | 1.326100000  | 3.916600000  |
| 1 | -1.800700000 | 2.894400000  | 2.596000000  | 6 | 3.793200000  | -2.038000000 | -2.296900000 |
| 1 | -3.306500000 | 2.179400000  | 2.630700000  | 6 | 4.145800000  | 0.015600000  | -1.154200000 |
| 1 | -2.035600000 | 1.487000000  | 3.458500000  | 6 | 3.807800000  | -1.986100000 | 0.078900000  |

---

**G3**


---

|   |              |              |              |
|---|--------------|--------------|--------------|
| 6 | -1.971000000 | 1.134200000  | -1.103000000 |
| 6 | -2.718300000 | -0.198400000 | -1.092900000 |
| 6 | -2.322600000 | -0.953300000 | 0.175100000  |
| 6 | -2.331000000 | 1.961400000  | 0.135700000  |
| 6 | -0.429400000 | 0.922000000  | 1.365400000  |
| 6 | -2.683500000 | -0.138300000 | 1.421600000  |
| 6 | -1.938100000 | 1.203600000  | 1.411600000  |
| 6 | -2.352800000 | -1.016300000 | -2.328900000 |
| 6 | -0.083000000 | 0.042600000  | -2.367000000 |
| 6 | -0.849200000 | -1.279100000 | -2.344600000 |
| 6 | -0.434900000 | -2.045100000 | -1.089200000 |
| 6 | 1.074000000  | -2.311900000 | -1.095700000 |
| 6 | 1.846600000  | -0.985600000 | -1.122400000 |
| 6 | 1.428200000  | -0.211500000 | -2.380300000 |
| 6 | -0.467800000 | 0.866300000  | -1.139800000 |
| 6 | 1.445200000  | -0.163500000 | 0.110700000  |
| 6 | -0.821300000 | -1.232400000 | 0.144900000  |
| 6 | -0.069000000 | 0.097800000  | 0.119600000  |
| 7 | -2.292400000 | 2.033500000  | 2.669400000  |
| 7 | 3.372800000  | -1.244100000 | -1.123500000 |
| 1 | -2.259300000 | 1.702100000  | -1.993700000 |
| 1 | -3.798200000 | -0.016700000 | -1.093200000 |
| 1 | -2.866500000 | -1.902900000 | 0.213500000  |
| 1 | -1.805400000 | 2.911900000  | 0.061000000  |
| 1 | -3.402900000 | 2.148100000  | 0.102600000  |
| 1 | -0.116400000 | 0.353700000  | 2.239500000  |
| 1 | 0.134800000  | 1.851900000  | 1.320400000  |
| 1 | -3.761900000 | 0.009700000  | 1.413600000  |
| 1 | -2.416200000 | -0.733900000 | 2.292900000  |
| 1 | -2.896200000 | -1.964100000 | -2.322100000 |
| 1 | -2.645900000 | -0.476500000 | -3.232400000 |
| 1 | -0.348300000 | 0.597400000  | -3.273000000 |
| 1 | -0.600000000 | -1.866100000 | -3.234900000 |
| 1 | -0.956200000 | -3.007800000 | -1.066200000 |
| 1 | 1.294800000  | -2.914100000 | -1.975200000 |
| 1 | 1.310000000  | -2.890500000 | -0.204200000 |
| 1 | 1.924100000  | 0.756200000  | -2.433600000 |
| 1 | 1.656300000  | -0.774500000 | -3.283700000 |
| 1 | 0.063900000  | 1.823300000  | -1.172100000 |
| 1 | 1.693600000  | -0.696600000 | 1.026700000  |
| 1 | 1.947100000  | 0.802500000  | 0.109800000  |

|   |              |              |              |
|---|--------------|--------------|--------------|
| 1 | -0.864300000 | 1.147000000  | 3.968000000  |
| 1 | -2.468400000 | 0.386400000  | 3.999800000  |
| 1 | -2.210000000 | 1.944400000  | 4.767100000  |
| 1 | -4.059800000 | 2.915900000  | 1.887400000  |
| 1 | -3.939600000 | 2.906900000  | 3.640200000  |
| 1 | -4.320900000 | 1.414900000  | 2.794300000  |
| 1 | -1.842100000 | 3.930900000  | 1.825700000  |
| 1 | -0.510000000 | 3.187000000  | 2.733800000  |
| 1 | -1.883200000 | 3.882400000  | 3.580300000  |
| 1 | 3.922200000  | 0.588300000  | -2.047900000 |
| 1 | 5.207200000  | -0.220500000 | -1.166100000 |
| 1 | 3.946800000  | 0.615400000  | -0.272700000 |
| 1 | 3.319200000  | -2.952800000 | 0.138300000  |
| 1 | 3.608800000  | -1.416500000 | 0.980200000  |
| 1 | 4.880100000  | -2.157400000 | 0.020700000  |
| 1 | 3.562900000  | -1.519100000 | -3.221600000 |
| 1 | 3.317400000  | -3.013100000 | -2.298800000 |
| 1 | 4.869200000  | -2.190100000 | -2.257000000 |

---

**G4**


---

|   |              |              |              |
|---|--------------|--------------|--------------|
| 6 | -1.926400000 | 1.165400000  | -1.057900000 |
| 6 | -2.672000000 | -0.171600000 | -1.040200000 |
| 6 | -2.282100000 | -0.936100000 | 0.227500000  |
| 6 | -2.291700000 | 1.990300000  | 0.179200000  |
| 6 | -0.390700000 | 0.949900000  | 1.424700000  |
| 6 | -2.648900000 | -0.120300000 | 1.470100000  |
| 6 | -1.894500000 | 1.206100000  | 1.427200000  |
| 6 | -2.304800000 | -0.989900000 | -2.275800000 |
| 6 | -0.039000000 | 0.075400000  | -2.316900000 |
| 6 | -0.800700000 | -1.252200000 | -2.288300000 |
| 6 | -0.394200000 | -2.025800000 | -1.031300000 |
| 6 | 1.113700000  | -2.291800000 | -1.038800000 |
| 6 | 1.848000000  | -0.953900000 | -1.068800000 |
| 6 | 1.470100000  | -0.182100000 | -2.330400000 |
| 6 | -0.419900000 | 0.895600000  | -1.082000000 |
| 6 | 1.491900000  | -0.136700000 | 0.169100000  |
| 6 | -0.775600000 | -1.205900000 | 0.203600000  |
| 6 | -0.018700000 | 0.128200000  | 0.184200000  |
| 7 | -2.245500000 | 2.009000000  | 2.642700000  |
| 7 | 3.325400000  | -1.204200000 | -1.071400000 |
| 1 | -2.208300000 | 1.721600000  | -1.957300000 |
| 1 | -3.752000000 | 0.009400000  | -1.043300000 |
| 1 | -2.819500000 | -1.889200000 | 0.251300000  |

---

|            |              |              |              |   |              |              |              |
|------------|--------------|--------------|--------------|---|--------------|--------------|--------------|
| 1          | -1.767000000 | 2.945600000  | 0.139300000  | 7 | 4.094400000  | -3.262000000 | 1.239500000  |
| 1          | -3.364600000 | 2.184900000  | 0.170600000  | 7 | 5.159900000  | -1.083200000 | 1.223800000  |
| 1          | -0.098900000 | 0.396500000  | 2.318000000  | 7 | 5.142000000  | 1.131400000  | 1.205900000  |
| 1          | 0.154900000  | 1.893800000  | 1.402600000  | 7 | 4.065300000  | 3.304400000  | 1.189100000  |
| 1          | -3.726300000 | 0.048300000  | 1.477200000  | 7 | 2.312200000  | 4.658200000  | 1.173600000  |
| 1          | -2.382100000 | -0.688400000 | 2.362100000  | 7 | -0.046400000 | 5.160900000  | -1.260300000 |
| 1          | -2.848700000 | -1.937600000 | -2.270600000 | 7 | -2.206000000 | 4.667300000  | -1.260600000 |
| 1          | -2.596700000 | -0.450700000 | -3.180400000 | 7 | -4.110600000 | 3.165700000  | -1.247900000 |
| 1          | -0.317500000 | 0.629600000  | -3.218700000 | 7 | -5.091800000 | 1.180100000  | -1.227700000 |
| 1          | -0.550900000 | -1.839100000 | -3.178500000 | 7 | -5.088100000 | -1.245000000 | -1.200600000 |
| 1          | -0.927900000 | -2.981100000 | -1.009700000 | 7 | -4.106300000 | -3.230100000 | -1.179500000 |
| 1          | 1.363500000  | -2.889000000 | -1.916400000 | 7 | -2.191300000 | -4.718200000 | -1.166600000 |
| 1          | 1.380700000  | -2.859800000 | -0.146900000 | 7 | -0.025800000 | -5.183700000 | -1.166400000 |
| 1          | 1.994900000  | 0.773000000  | -2.372200000 | 7 | 2.337800000  | -4.638400000 | -1.173200000 |
| 1          | 1.723400000  | -0.754700000 | -3.223300000 | 7 | 4.082400000  | -3.273500000 | -1.187600000 |
| 1          | 0.111000000  | 1.852700000  | -1.114800000 | 7 | 5.147800000  | -1.094900000 | -1.203900000 |
| 1          | 1.766500000  | -0.680200000 | 1.073900000  | 7 | 5.156200000  | 1.119800000  | -1.221800000 |
| 1          | 2.020300000  | 0.817200000  | 0.158800000  | 7 | 4.079000000  | 3.292800000  | -1.238200000 |
| 1          | -0.502400000 | -1.769800000 | 1.101600000  | 7 | 2.323500000  | 4.643300000  | -1.253000000 |
| 1          | -1.753200000 | 2.910600000  | 2.636400000  | 6 | -1.043400000 | 4.529200000  | 1.852200000  |
| 1          | -3.255100000 | 2.194000000  | 2.669900000  | 6 | -3.497200000 | 4.371400000  | 1.729400000  |
| 1          | -1.988000000 | 1.502500000  | 3.498600000  | 1 | -3.323600000 | 4.160100000  | 2.791000000  |
| 1          | 3.594700000  | -1.753400000 | -1.896200000 | 1 | -4.171300000 | 5.225500000  | 1.597600000  |
| 1          | 3.842200000  | -0.316600000 | -1.092500000 | 6 | -4.220100000 | 2.023200000  | 1.874000000  |
| 1          | 3.606000000  | -1.725000000 | -0.231600000 | 6 | -5.621100000 | 0.001800000  | 1.772500000  |
|            |              |              |              | 1 | -5.344100000 | 0.014900000  | 2.833100000  |
|            |              |              |              | 1 | -6.709300000 | -0.003100000 | 1.644000000  |
|            |              |              |              | 6 | -4.201300000 | -2.004500000 | 1.914800000  |
|            |              |              |              | 6 | -3.460100000 | -4.349500000 | 1.823800000  |
|            |              |              |              | 1 | -3.280600000 | -4.109500000 | 2.878300000  |
|            |              |              |              | 1 | -4.129300000 | -5.211100000 | 1.719100000  |
|            |              |              |              | 6 | -1.005100000 | -4.492800000 | 1.936000000  |
|            |              |              |              | 6 | 1.281400000  | -5.397800000 | 1.827400000  |
|            |              |              |              | 1 | 1.218300000  | -5.103300000 | 2.881400000  |
|            |              |              |              | 1 | 1.522100000  | -6.462200000 | 1.724400000  |
|            |              |              |              | 6 | 2.958500000  | -3.599200000 | 1.927400000  |
|            |              |              |              | 6 | 5.105600000  | -2.402400000 | 1.791200000  |
|            |              |              |              | 1 | 6.083200000  | -2.881200000 | 1.664700000  |
|            |              |              |              | 1 | 4.858000000  | -2.273800000 | 2.851300000  |
|            |              |              |              | 6 | 4.716100000  | 0.026000000  | 1.894700000  |
|            |              |              |              | 6 | 5.076300000  | 2.456300000  | 1.758800000  |
|            |              |              |              | 1 | 6.052200000  | 2.939400000  | 1.635800000  |
|            |              |              |              | 1 | 4.820300000  | 2.337400000  | 2.818100000  |
|            |              |              |              | 6 | 2.921700000  | 3.642900000  | 1.863300000  |
|            |              |              |              | 6 | 1.241300000  | 5.436600000  | 1.732800000  |
|            |              |              |              | 1 | 1.175500000  | 5.158900000  | 2.791200000  |
|            |              |              |              | 1 | 1.478800000  | 6.500100000  | 1.613600000  |
|            |              |              |              | 6 | -1.027900000 | 4.483900000  | -1.935900000 |
|            |              |              |              | 6 | -3.481600000 | 4.321700000  | -1.825300000 |
|            |              |              |              | 1 | -3.299300000 | 4.081200000  | -2.879100000 |
| <hr/>      |              |              |              |   |              |              |              |
| <b>CB7</b> |              |              |              |   |              |              |              |
| 8          | -0.920900000 | 3.982900000  | 2.927900000  | 6 | -4.201300000 | -2.004500000 | 1.914800000  |
| 8          | -3.709300000 | 1.785700000  | 2.947700000  | 6 | -3.460100000 | -4.349500000 | 1.823800000  |
| 8          | -3.685700000 | -1.736500000 | 2.979000000  | 1 | -3.280600000 | -4.109500000 | 2.878300000  |
| 8          | -0.879400000 | -3.920800000 | 2.997900000  | 1 | -4.129300000 | -5.211100000 | 1.719100000  |
| 8          | 2.611500000  | -3.143900000 | 2.996400000  | 6 | -1.005100000 | -4.492800000 | 1.936000000  |
| 8          | 4.140900000  | 0.030100000  | 2.962100000  | 6 | 1.281400000  | -5.397800000 | 1.827400000  |
| 8          | 2.566900000  | 3.196000000  | 2.933300000  | 1 | 1.218300000  | -5.103300000 | 2.881400000  |
| 8          | -0.896900000 | 3.912000000  | -2.997100000 | 1 | 1.522100000  | -6.462200000 | 1.724400000  |
| 8          | -3.694600000 | 1.707500000  | -2.979800000 | 6 | 2.958500000  | -3.599200000 | 1.927400000  |
| 8          | -3.701800000 | -1.813500000 | -2.948300000 | 6 | 5.105600000  | -2.402400000 | 1.791200000  |
| 8          | -0.901100000 | -3.987500000 | -2.927600000 | 1 | 6.083200000  | -2.881200000 | 1.664700000  |
| 8          | 2.583900000  | -3.174000000 | -2.932300000 | 1 | 4.858000000  | -2.273800000 | 2.851300000  |
| 8          | 4.143500000  | 0.002000000  | -2.960900000 | 6 | 4.716100000  | 0.026000000  | 1.894700000  |
| 8          | 2.597800000  | 3.164500000  | -2.995800000 | 6 | 5.076300000  | 2.456300000  | 1.758800000  |
| 7          | -0.055500000 | 5.185700000  | 1.166200000  | 1 | 6.052200000  | 2.939400000  | 1.635800000  |
| 7          | -2.216900000 | 4.701500000  | 1.166100000  | 1 | 4.820300000  | 2.337400000  | 2.818100000  |
| 7          | -4.121400000 | 3.200000000  | 1.178900000  | 6 | 2.921700000  | 3.642900000  | 1.863300000  |
| 7          | -5.092700000 | 1.209700000  | 1.200200000  | 6 | 1.241300000  | 5.436600000  | 1.732800000  |
| 7          | -5.085600000 | -1.215400000 | 1.227300000  | 1 | 1.175500000  | 5.158900000  | 2.791200000  |
| 7          | -4.096000000 | -3.196800000 | 1.247500000  | 1 | 1.478800000  | 6.500100000  | 1.613600000  |
| 7          | -2.181400000 | -4.685600000 | 1.260200000  | 6 | -1.027900000 | 4.483900000  | -1.935900000 |
| 7          | -0.017700000 | -5.160700000 | 1.260200000  | 6 | -3.481600000 | 4.321700000  | -1.825300000 |
| 7          | 2.348100000  | -4.624400000 | 1.253400000  | 1 | -3.299300000 | 4.081200000  | -2.879100000 |

|   |              |              |              |            |              |              |              |
|---|--------------|--------------|--------------|------------|--------------|--------------|--------------|
| 1 | -4.156800000 | 5.179000000  | -1.722800000 | 1          | 5.218500000  | 4.555600000  | -0.024200000 |
| 6 | -4.211100000 | 1.973100000  | -1.915300000 | 6          | 3.011100000  | 5.005600000  | -0.038600000 |
| 6 | -5.622300000 | -0.039500000 | -1.772600000 | 1          | 3.243000000  | 6.079200000  | -0.044200000 |
| 1 | -5.345900000 | -0.051300000 | -2.833400000 |            |              |              |              |
| 1 | -6.710400000 | -0.039300000 | -1.643400000 |            |              |              |              |
| 6 | -4.211300000 | -2.053800000 | -1.874500000 |            |              |              |              |
| 6 | -3.474300000 | -4.397600000 | -1.729500000 |            |              |              |              |
| 1 | -3.302900000 | -4.185800000 | -2.791300000 |            |              |              |              |
| 1 | -4.142300000 | -5.256200000 | -1.596500000 |            |              |              |              |
| 6 | -1.019200000 | -4.535400000 | -1.852300000 |            |              |              |              |
| 6 | 1.272700000  | -5.424100000 | -1.733300000 |            |              |              |              |
| 1 | 1.204900000  | -5.145400000 | -2.791300000 |            |              |              |              |
| 1 | 1.518300000  | -6.485900000 | -1.615500000 |            |              |              |              |
| 6 | 2.941100000  | -3.619000000 | -1.862400000 |            |              |              |              |
| 6 | 5.088900000  | -2.419900000 | -1.757200000 |            |              |              |              |
| 1 | 6.067300000  | -2.898100000 | -1.634600000 |            |              |              |              |
| 1 | 4.832000000  | -2.301900000 | -2.816400000 |            |              |              |              |
| 6 | 4.717700000  | 0.008700000  | -1.893000000 |            |              |              |              |
| 6 | 5.095800000  | 2.438900000  | -1.788700000 |            |              |              |              |
| 1 | 4.850500000  | 2.309500000  | -2.849300000 |            |              |              |              |
| 1 | 6.070500000  | 2.922900000  | -1.660400000 |            |              |              |              |
| 6 | 2.941200000  | 3.622200000  | -1.926600000 |            |              |              |              |
| 6 | 1.251000000  | 5.408300000  | -1.827100000 |            |              |              |              |
| 1 | 1.483200000  | 6.474600000  | -1.723800000 |            |              |              |              |
| 1 | 1.190500000  | 5.113600000  | -2.881200000 |            |              |              |              |
| 6 | -0.530500000 | 5.786900000  | -0.055300000 |            |              |              |              |
| 1 | -0.288900000 | 6.858400000  | -0.065300000 |            |              |              |              |
| 6 | -2.042900000 | 5.444500000  | -0.057000000 |            |              |              |              |
| 1 | -2.722500000 | 6.307200000  | -0.072300000 |            |              |              |              |
| 6 | -4.894500000 | 3.194700000  | -0.038000000 |            |              |              |              |
| 1 | -5.576900000 | 4.055300000  | -0.053100000 |            |              |              |              |
| 6 | -5.577500000 | 1.802700000  | -0.021500000 |            |              |              |              |
| 1 | -6.675800000 | 1.815600000  | -0.022100000 |            |              |              |              |
| 6 | -5.569200000 | -1.840300000 | 0.021400000  |            |              |              |              |
| 1 | -6.667400000 | -1.858600000 | 0.022800000  |            |              |              |              |
| 6 | -4.879500000 | -3.229000000 | 0.037400000  |            |              |              |              |
| 1 | -5.557800000 | -4.092800000 | 0.052000000  |            |              |              |              |
| 6 | -2.011300000 | -5.460400000 | 0.056100000  |            |              |              |              |
| 1 | -2.683600000 | -6.328900000 | 0.070500000  |            |              |              |              |
| 6 | -0.496100000 | -5.789900000 | 0.054500000  |            |              |              |              |
| 1 | -0.245500000 | -6.859300000 | 0.063800000  |            |              |              |              |
| 6 | 3.038600000  | -4.981700000 | 0.039200000  |            |              |              |              |
| 1 | 3.277500000  | -6.053800000 | 0.044400000  |            |              |              |              |
| 6 | 4.260200000  | -4.026800000 | 0.028800000  |            |              |              |              |
| 1 | 5.243000000  | -4.517200000 | 0.026200000  |            |              |              |              |
| 6 | 5.856900000  | -0.755600000 | 0.005200000  |            |              |              |              |
| 1 | 6.849800000  | -1.225300000 | 0.002700000  |            |              |              |              |
| 6 | 5.853600000  | 0.795200000  | -0.002600000 |            |              |              |              |
| 1 | 6.844300000  | 1.269200000  | 0.000800000  |            |              |              |              |
| 6 | 4.238900000  | 4.058600000  | -0.027300000 |            |              |              |              |
|   |              |              |              | <b>CB8</b> |              |              |              |
|   |              |              |              | 7          | 17.607200000 | 9.939000000  | 3.565200000  |
|   |              |              |              | 6          | 18.041400000 | 8.884100000  | 4.445200000  |
|   |              |              |              | 1          | 19.029900000 | 8.518600000  | 4.135400000  |
|   |              |              |              | 7          | 18.062200000 | 9.243200000  | 5.842000000  |
|   |              |              |              | 6          | 16.364000000 | 9.707900000  | 3.037600000  |
|   |              |              |              | 8          | 15.784100000 | 10.417900000 | 2.243400000  |
|   |              |              |              | 6          | 17.110900000 | 8.581200000  | 6.572800000  |
|   |              |              |              | 8          | 16.955400000 | 8.656100000  | 7.773200000  |
|   |              |              |              | 7          | 15.940600000 | 8.480600000  | 3.477000000  |
|   |              |              |              | 6          | 16.889700000 | 7.849200000  | 4.361400000  |
|   |              |              |              | 1          | 17.168500000 | 6.861000000  | 3.970900000  |
|   |              |              |              | 7          | 16.446300000 | 7.733100000  | 5.726900000  |
|   |              |              |              | 6          | 14.843000000 | 7.784700000  | 2.863800000  |
|   |              |              |              | 1          | 15.189900000 | 6.795300000  | 2.539100000  |
|   |              |              |              | 1          | 14.526600000 | 8.393400000  | 2.008700000  |
|   |              |              |              | 6          | 15.590100000 | 6.682400000  | 6.202700000  |
|   |              |              |              | 1          | 15.707100000 | 6.655100000  | 7.292100000  |
|   |              |              |              | 1          | 15.906200000 | 5.737000000  | 5.744900000  |
|   |              |              |              | 7          | 13.684100000 | 7.616600000  | 3.696900000  |
|   |              |              |              | 6          | 13.559300000 | 6.574200000  | 4.686200000  |
|   |              |              |              | 1          | 13.945800000 | 5.627000000  | 4.286200000  |
|   |              |              |              | 7          | 14.189200000 | 6.871700000  | 5.946900000  |
|   |              |              |              | 6          | 12.488300000 | 8.225200000  | 3.417300000  |
|   |              |              |              | 8          | 12.306900000 | 9.089300000  | 2.585700000  |
|   |              |              |              | 6          | 13.284100000 | 7.116300000  | 6.945800000  |
|   |              |              |              | 8          | 13.549400000 | 7.354100000  | 8.105100000  |
|   |              |              |              | 7          | 11.517000000 | 7.607700000  | 4.160800000  |
|   |              |              |              | 6          | 12.047100000 | 6.587600000  | 5.029200000  |
|   |              |              |              | 1          | 11.515800000 | 5.640200000  | 4.865400000  |
|   |              |              |              | 7          | 12.028300000 | 6.929500000  | 6.430200000  |
|   |              |              |              | 6          | 10.115600000 | 7.767500000  | 3.887800000  |
|   |              |              |              | 1          | 10.040200000 | 8.345800000  | 2.959700000  |
|   |              |              |              | 1          | 9.665500000  | 6.773300000  | 3.773700000  |
|   |              |              |              | 6          | 10.869000000 | 6.792400000  | 7.268100000  |
|   |              |              |              | 1          | 10.373100000 | 5.842200000  | 7.032900000  |
|   |              |              |              | 1          | 11.231800000 | 6.804600000  | 8.302400000  |
|   |              |              |              | 7          | 9.378900000  | 8.498000000  | 4.881600000  |
|   |              |              |              | 6          | 8.911000000  | 7.919500000  | 6.117100000  |
|   |              |              |              | 1          | 8.493000000  | 6.920900000  | 5.930800000  |
|   |              |              |              | 7          | 9.905500000  | 7.852400000  | 7.157500000  |
|   |              |              |              | 6          | 8.812800000  | 9.718200000  | 4.620900000  |
|   |              |              |              | 8          | 8.992300000  | 10.388000000 | 3.625900000  |
|   |              |              |              | 6          | 9.666700000  | 8.739700000  | 8.174200000  |
|   |              |              |              | 8          | 10.327400000 | 8.859400000  | 9.184300000  |
|   |              |              |              | 7          | 7.921600000  | 9.991100000  | 5.624800000  |

|   |              |              |              |   |              |              |              |
|---|--------------|--------------|--------------|---|--------------|--------------|--------------|
| 6 | 7.907600000  | 8.976300000  | 6.647200000  | 8 | 14.058300000 | 16.824200000 | 10.648900000 |
| 1 | 6.882000000  | 8.617000000  | 6.807400000  | 6 | 13.226200000 | 18.524000000 | 6.145200000  |
| 7 | 8.489300000  | 9.386000000  | 7.901900000  | 8 | 12.999500000 | 18.215600000 | 4.994200000  |
| 6 | 6.936400000  | 11.031400000 | 5.520600000  | 7 | 14.892400000 | 18.186600000 | 8.991500000  |
| 1 | 5.948800000  | 10.602800000 | 5.730900000  | 6 | 14.394600000 | 19.173500000 | 8.065500000  |
| 1 | 6.993600000  | 11.413500000 | 4.494900000  | 1 | 14.921700000 | 20.126200000 | 8.210900000  |
| 6 | 7.778800000  | 10.140100000 | 8.897900000  | 7 | 14.461400000 | 18.778200000 | 6.681400000  |
| 1 | 6.755200000  | 9.750900000  | 8.970300000  | 6 | 16.286200000 | 18.003300000 | 9.287700000  |
| 1 | 8.322500000  | 10.002100000 | 9.839700000  | 1 | 16.331200000 | 17.440100000 | 10.227000000 |
| 7 | 7.144000000  | 12.157700000 | 6.387500000  | 1 | 16.757800000 | 18.988500000 | 9.392600000  |
| 6 | 6.765900000  | 12.178900000 | 7.777400000  | 6 | 15.638800000 | 18.924900000 | 5.870800000  |
| 1 | 5.776300000  | 11.719500000 | 7.905200000  | 1 | 16.112500000 | 19.885200000 | 6.111100000  |
| 7 | 7.718000000  | 11.556900000 | 8.664800000  | 1 | 15.306700000 | 18.897400000 | 4.826500000  |
| 6 | 7.494400000  | 13.395200000 | 5.915400000  | 7 | 17.022600000 | 17.243000000 | 8.316000000  |
| 8 | 7.813500000  | 13.658400000 | 4.775400000  | 6 | 17.556700000 | 17.806600000 | 7.102200000  |
| 6 | 8.344800000  | 12.460000000 | 9.483300000  | 1 | 17.978500000 | 18.800900000 | 7.302400000  |
| 8 | 9.143500000  | 12.194000000 | 10.356400000 | 7 | 16.613700000 | 17.879400000 | 6.013500000  |
| 7 | 7.305800000  | 14.299400000 | 6.927200000  | 6 | 17.523100000 | 15.995800000 | 8.583700000  |
| 6 | 6.858500000  | 13.681100000 | 8.150900000  | 8 | 17.267700000 | 15.320500000 | 9.558400000  |
| 1 | 5.920500000  | 14.144400000 | 8.485800000  | 6 | 16.916300000 | 17.017100000 | 4.992500000  |
| 7 | 7.827400000  | 13.700800000 | 9.217400000  | 8 | 16.317500000 | 16.919300000 | 3.942300000  |
| 6 | 7.288400000  | 15.717000000 | 6.695900000  | 7 | 18.446000000 | 15.695100000 | 7.616300000  |
| 1 | 6.346400000  | 16.126800000 | 7.081400000  | 6 | 18.569800000 | 16.734500000 | 6.623900000  |
| 1 | 7.365900000  | 15.854000000 | 5.611200000  | 1 | 19.614400000 | 17.067200000 | 6.555400000  |
| 6 | 8.014400000  | 14.819700000 | 10.099500000 | 7 | 18.080300000 | 16.372400000 | 5.318400000  |
| 1 | 7.031500000  | 15.241400000 | 10.344100000 | 6 | 19.392500000 | 14.623900000 | 7.765500000  |
| 1 | 8.514200000  | 14.433300000 | 10.995300000 | 1 | 20.405000000 | 15.029000000 | 7.642900000  |
| 7 | 8.853400000  | 15.867700000 | 9.587900000  | 1 | 19.247600000 | 14.218000000 | 8.773400000  |
| 6 | 8.402400000  | 16.873400000 | 8.657800000  | 6 | 18.845200000 | 15.626100000 | 4.358300000  |
| 1 | 7.411100000  | 17.242600000 | 8.953700000  | 1 | 19.880000000 | 15.989900000 | 4.374000000  |
| 7 | 8.379700000  | 16.444900000 | 7.282300000  | 1 | 18.377300000 | 15.801700000 | 3.382800000  |
| 6 | 10.071800000 | 16.165200000 | 10.139500000 | 7 | 19.221900000 | 13.525800000 | 6.854500000  |
| 8 | 10.647400000 | 15.516000000 | 10.986900000 | 6 | 19.712200000 | 13.531100000 | 5.498100000  |
| 6 | 9.357900000  | 17.038800000 | 6.528400000  | 1 | 20.720800000 | 13.964900000 | 5.464000000  |
| 8 | 9.533100000  | 16.882800000 | 5.338400000  | 7 | 18.853600000 | 14.203300000 | 4.556400000  |
| 7 | 10.467100000 | 17.383200000 | 9.652600000  | 6 | 18.845400000 | 12.277200000 | 7.275400000  |
| 6 | 9.543100000  | 17.923500000 | 8.688400000  | 8 | 18.449700000 | 11.989600000 | 8.385300000  |
| 1 | 9.243900000  | 18.939000000 | 8.981400000  | 6 | 18.233100000 | 13.337400000 | 3.694900000  |
| 7 | 10.029800000 | 17.923700000 | 7.330600000  | 8 | 17.495100000 | 13.646400000 | 2.783500000  |
| 6 | 11.540700000 | 18.136800000 | 10.238200000 | 7 | 19.102000000 | 11.394600000 | 6.259100000  |
| 1 | 11.177200000 | 19.145600000 | 10.469500000 | 6 | 19.610400000 | 12.042300000 | 5.076500000  |
| 1 | 11.835800000 | 17.602500000 | 11.148600000 | 1 | 20.553700000 | 11.572600000 | 4.766200000  |
| 6 | 10.891700000 | 18.941400000 | 6.795300000  | 7 | 18.686300000 | 12.074000000 | 3.969900000  |
| 1 | 10.807400000 | 18.878700000 | 5.704100000  | 6 | 19.134000000 | 9.972400000  | 6.461600000  |
| 1 | 10.553900000 | 19.918500000 | 7.163600000  | 1 | 20.089400000 | 9.586100000  | 6.084700000  |
| 7 | 12.722200000 | 18.247200000 | 9.428400000  | 1 | 19.037400000 | 9.806400000  | 7.540700000  |
| 6 | 12.872200000 | 19.200300000 | 8.358700000  | 6 | 18.476600000 | 10.971600000 | 3.072700000  |
| 1 | 12.465400000 | 20.174400000 | 8.662300000  | 1 | 19.448300000 | 10.524400000 | 2.828700000  |
| 7 | 12.286200000 | 18.788400000 | 7.106700000  | 1 | 17.995900000 | 11.387300000 | 2.179500000  |
| 6 | 13.901900000 | 17.634900000 | 9.760600000  |   |              |              |              |

| CB[7]•G1 |              |              |              |   |              |              |              |
|----------|--------------|--------------|--------------|---|--------------|--------------|--------------|
| 8        | 0.743322385  | -3.874730731 | 3.375092227  | 1 | 6.996087897  | -0.404104043 | 1.818299940  |
| 8        | 3.855100683  | -1.865744790 | 3.295860490  | 6 | 4.540926962  | 1.684597887  | 2.226993011  |
| 8        | 4.056349559  | 1.421897645  | 3.306556674  | 6 | 3.772399066  | 4.010540394  | 2.154712531  |
| 8        | 1.182351047  | 3.727415172  | 3.356192751  | 1 | 3.585524916  | 3.744294402  | 3.201791789  |
| 8        | -2.614977724 | 3.444470444  | 3.507211960  | 1 | 4.458112265  | 4.864426913  | 2.082074721  |
| 8        | -4.441845938 | 0.261984076  | 3.435924564  | 6 | 1.325582196  | 4.269183310  | 2.280919446  |
| 8        | -2.986843132 | -3.096274477 | 3.499727455  | 6 | -0.893311227 | 5.327504802  | 2.197702194  |
| 8        | 0.747113125  | -4.224988232 | -2.739684835 | 1 | -0.841567108 | 5.022239115  | 3.249360079  |
| 8        | 3.927847578  | -2.035310639 | -2.763270114 | 1 | -1.017792789 | 6.414985022  | 2.111908680  |
| 8        | 4.159355763  | 1.643712233  | -2.749282962 | 6 | -2.825447454 | 3.807452932  | 2.368970826  |
| 8        | 1.286973017  | 4.177351829  | -2.741517073 | 6 | -5.034545058 | 2.734335478  | 2.131009372  |
| 8        | -2.337422846 | 3.231924870  | -2.546398012 | 1 | -5.965854698 | 3.283865469  | 1.948733293  |
| 8        | -4.418376736 | 0.210170335  | -2.699194404 | 1 | -4.855313016 | 2.610340077  | 3.205367495  |
| 8        | -2.791570169 | -2.942108426 | -2.545961660 | 6 | -4.886157455 | 0.285405844  | 2.306304693  |
| 7        | -0.229654286 | -4.953882497 | 1.586646132  | 6 | -5.326235274 | -2.129216060 | 2.144122626  |
| 7        | 1.969213329  | -4.628834141 | 1.578161857  | 1 | -6.317962642 | -2.563911045 | 1.971475128  |
| 7        | 3.995968916  | -3.318187402 | 1.516366815  | 1 | -5.125947674 | -2.021710288 | 3.216610632  |
| 7        | 5.267207729  | -1.501912125 | 1.513097117  | 6 | -3.254852011 | -3.450014362 | 2.371187731  |
| 7        | 5.418505577  | 0.904215364  | 1.522973068  | 6 | -1.514130090 | -5.190673358 | 2.197456726  |
| 7        | 4.381573677  | 2.862505529  | 1.541853204  | 1 | -1.424916724 | -4.897599889 | 3.250028054  |
| 7        | 2.504825273  | 4.378483850  | 1.586796262  | 1 | -1.758833084 | -6.257173550 | 2.108009668  |
| 7        | 0.357625499  | 4.952891740  | 1.588085630  | 6 | 0.825128868  | -4.600935682 | -1.593318387 |
| 7        | -2.047042137 | 4.674071857  | 1.642368078  | 6 | 3.283399379  | -4.511324175 | -1.436712479 |
| 7        | -3.928716312 | 3.498454288  | 1.616886623  | 1 | 3.119304755  | -4.304605534 | -2.500900737 |
| 7        | -5.149727918 | 1.412430520  | 1.572532301  | 1 | 3.877975615  | -5.423545133 | -1.302223832 |
| 7        | -5.285848927 | -0.805207028 | 1.579030988  | 6 | 4.324592323  | -2.271343137 | -1.645339182 |
| 7        | -4.323878961 | -3.023963015 | 1.627245892  | 6 | 5.830269580  | -0.315494691 | -1.465218947 |
| 7        | -2.592668314 | -4.413271802 | 1.648827615  | 1 | 5.585662681  | -0.296232868 | -2.533659710 |
| 7        | -0.217910191 | -5.073594451 | -0.839465201 | 1 | 6.913076550  | -0.383098141 | -1.311526455 |
| 7        | 1.977627291  | -4.712182103 | -0.853856078 | 6 | 4.581472708  | 1.815763071  | -1.628764465 |
| 7        | 4.027341528  | -3.393709331 | -0.908990406 | 6 | 3.829965823  | 4.163503205  | -1.408277074 |
| 7        | 5.212287353  | -1.505807650 | -0.928684822 | 1 | 3.657653803  | 3.987487174  | -2.476689806 |
| 7        | 5.362624533  | 0.936852462  | -0.918411341 | 1 | 4.525538514  | 4.997754439  | -1.254940097 |
| 7        | 4.428170018  | 2.960362731  | -0.884030439 | 6 | 1.396271053  | 4.529988126  | -1.589915872 |
| 7        | 2.548562805  | 4.510759462  | -0.841580537 | 6 | -0.893715848 | 5.409059563  | -1.372189172 |
| 7        | 0.404690621  | 5.101963109  | -0.835544713 | 1 | -0.855440595 | 5.144399533  | -2.435223281 |
| 7        | -1.978590391 | 4.663722470  | -0.786360481 | 1 | -1.094104090 | 6.479556788  | -1.242142026 |
| 7        | -3.828169459 | 3.425922707  | -0.807410563 | 6 | -2.668191057 | 3.704608423  | -1.482498766 |
| 7        | -5.142673812 | 1.390493605  | -0.865740451 | 6 | -4.924010761 | 2.704255796  | -1.407100149 |
| 7        | -5.326151928 | -0.820902854 | -0.859469072 | 1 | -5.838219299 | 3.298257018  | -1.294882233 |
| 7        | -4.281375683 | -3.005419221 | -0.799263504 | 1 | -4.673548365 | 2.564561892  | -2.465109010 |
| 7        | -2.543151497 | -4.393243529 | -0.780442305 | 6 | -4.881481136 | 0.252849293  | -1.583279403 |
| 6        | 0.815084084  | -4.402286398 | 2.285962136  | 6 | -5.296602667 | -2.160749536 | -1.378342317 |
| 6        | 3.274719674  | -4.399399347 | 2.131573471  | 1 | -5.067099938 | -2.072636075 | -2.446529144 |
| 1        | 3.128355568  | -4.121642475 | 3.182065862  | 1 | -6.273764561 | -2.630307452 | -1.223098241 |
| 1        | 3.866152067  | -5.320241020 | 2.047013566  | 6 | -3.153245582 | -3.382964318 | -1.478049446 |
| 6        | 4.301618831  | -2.175996447 | 2.212566976  | 6 | -1.541667962 | -5.241135400 | -1.376069445 |
| 6        | 5.925431413  | -0.337455699 | 2.035986101  | 6 | -1.850089155 | -6.286881295 | -1.255346447 |
| 1        | 5.738046297  | -0.330151367 | 3.115941087  | 1 | -1.479397441 | -4.971149306 | -2.436776105 |
|          |              |              |              | 6 | 0.217963224  | -5.651448730 | 0.402992479  |

|   |              |              |              |                 |              |              |              |
|---|--------------|--------------|--------------|-----------------|--------------|--------------|--------------|
| 1 | -0.085608289 | -6.707538312 | 0.457592253  | 1               | -0.009793932 | 2.165949286  | -3.135550624 |
| 6 | 1.749816868  | -5.411023827 | 0.388819359  | 1               | 1.430249429  | 1.261413293  | -3.634095583 |
| 1 | 2.364650706  | -6.322592189 | 0.425299241  | 1               | -2.130664925 | -0.825526170 | -2.393917515 |
| 6 | 4.785236445  | -3.458411188 | 0.314141208  | 1               | -2.054452360 | 0.941228915  | -2.341395864 |
| 1 | 5.363054597  | -4.393005826 | 0.353958321  | 1               | 1.370346772  | -1.292743618 | -3.691956594 |
| 6 | 5.636785240  | -2.161920060 | 0.287012910  | 1               | -0.086741261 | -2.144131826 | -3.152276738 |
| 1 | 6.724496429  | -2.319601704 | 0.266862599  | 1               | 3.073962254  | -0.939581851 | 0.247174127  |
| 6 | 5.866459840  | 1.524165259  | 0.302150844  | 1               | 3.069170540  | 0.829029762  | 0.265749306  |
| 1 | 6.965365666  | 1.545216605  | 0.281568728  | 1               | 1.084337318  | 2.069716960  | 1.067611045  |
| 6 | 5.183970524  | 2.917046678  | 0.341493881  | 1               | 1.705750470  | -0.087506646 | 2.102761248  |
| 1 | 5.873738500  | 3.771675958  | 0.392601545  | 1               | 1.055768160  | -2.196656299 | 0.990489119  |
| 6 | 2.385655009  | 5.205430645  | 0.412954762  | 1               | -0.343224037 | -1.367430745 | 2.855343469  |
| 1 | 3.096966515  | 6.042295894  | 0.474246415  | 1               | -1.328800937 | -2.199268625 | 1.663019191  |
| 6 | 0.889837012  | 5.612694838  | 0.418430469  | 1               | -1.302209728 | 2.080062393  | 1.743869753  |
| 1 | 0.703071122  | 6.694775393  | 0.485147582  | 1               | -0.321347240 | 1.193176785  | 2.899258686  |
| 6 | -2.674103439 | 5.076000222  | 0.404707626  | 1               | -0.674809509 | 2.119248745  | -0.684318826 |
| 1 | -2.822366255 | 6.165403451  | 0.399449574  | 1               | -2.739147005 | -0.895474884 | 0.037239673  |
| 6 | -3.975499511 | 4.233806536  | 0.376315383  | 1               | -2.712034951 | 0.876031162  | 0.074129393  |
| 1 | -4.906572043 | 4.816331023  | 0.324721513  | 1               | -0.718397394 | -2.160702456 | -0.753653961 |
| 6 | -5.863512518 | 1.117464148  | 0.352157893  | 6               | -1.982723031 | 1.005217755  | -4.833950141 |
| 1 | -6.824972323 | 1.651343074  | 0.347779295  | 6               | 0.165594670  | 0.396291104  | -5.658761106 |
| 6 | -5.974559413 | -0.430154263 | 0.364764752  | 6               | -1.413454424 | -1.287028408 | -5.083385267 |
| 1 | -7.002193398 | -0.821198334 | 0.387130633  | 1               | -2.079713759 | -1.684296707 | -4.323604191 |
| 6 | -4.478458711 | -3.772707032 | 0.402430349  | 1               | -0.604034254 | -1.991381078 | -5.248385330 |
| 1 | -5.464494368 | -4.258467477 | 0.385144250  | 1               | -1.973143413 | -1.170550460 | -6.007634225 |
| 6 | -3.267940788 | -4.741561854 | 0.415542463  | 1               | 1.058710333  | -0.201490146 | -5.502734178 |
| 1 | -3.525220748 | -5.810335487 | 0.405021098  | 1               | 0.416661321  | 1.448781513  | -5.569705170 |
| 6 | 1.069720303  | 1.209018595  | -1.555582151 | 1               | -0.208413898 | 0.207861617  | -6.662128287 |
| 6 | 1.916413134  | -0.037943528 | -1.339379171 | 1               | -1.714286332 | 1.967051518  | -4.408460286 |
| 6 | 1.046357511  | -1.259380235 | -1.593119132 | 1               | -2.879055602 | 0.642394801  | -4.338474771 |
| 6 | 0.550639703  | 1.242654380  | -2.992784737 | 1               | -2.193018553 | 1.135345603  | -5.892019780 |
| 6 | -1.474064014 | 0.027805493  | -2.235778028 |                 |              |              |              |
| 6 | 0.510855218  | -1.244991607 | -3.022942972 |                 |              |              |              |
| 6 | -0.325775382 | 0.014521327  | -3.251029088 |                 |              |              |              |
| 6 | 2.458453219  | -0.055632903 | 0.083238130  |                 |              |              |              |
| 6 | 0.458991249  | 1.185851101  | 0.884409089  |                 |              |              |              |
| 6 | 1.308569157  | -0.066698928 | 1.076853149  |                 |              |              |              |
| 6 | 0.441000605  | -1.299492138 | 0.841215774  |                 |              |              |              |
| 6 | -0.715593401 | -1.312661704 | 1.827819437  |                 |              |              |              |
| 6 | -1.558254065 | -0.057079926 | 1.634731950  |                 |              |              |              |
| 6 | -0.698569041 | 1.179852410  | 1.872042595  |                 |              |              |              |
| 6 | -0.072713773 | 1.212676660  | -0.547374630 |                 |              |              |              |
| 6 | -2.104575897 | -0.022471071 | 0.207391618  |                 |              |              |              |
| 6 | -0.097340259 | -1.271532447 | -0.588179059 |                 |              |              |              |
| 6 | -0.947450201 | -0.017715184 | -0.795506399 |                 |              |              |              |
| 7 | -0.881809436 | 0.032329447  | -4.683895359 |                 |              |              |              |
| 1 | -2.374269967 | -0.066813308 | 2.363766375  |                 |              |              |              |
| 1 | 1.697761340  | 2.088241077  | -1.394525508 |                 |              |              |              |
| 1 | 2.741409581  | -0.039869819 | -2.055352844 |                 |              |              |              |
| 1 | 1.650295621  | -2.159431092 | -1.462056823 |                 |              |              |              |
|   |              |              |              | <b>CB 7 •G2</b> |              |              |              |
| 8 | -2.408241613 | -3.065191700 | 3.704902424  |                 |              |              |              |
| 8 | 0.637691644  | -4.760649893 | 2.591069647  |                 |              |              |              |
| 8 | 3.799026450  | -3.102371965 | 1.812637582  |                 |              |              |              |
| 8 | 4.781361200  | 0.603610292  | 1.944888541  |                 |              |              |              |
| 8 | 2.695804029  | 3.567359771  | 2.811461020  |                 |              |              |              |
| 8 | -0.652694360 | 3.653025275  | 3.796446918  |                 |              |              |              |
| 8 | -3.001749403 | 0.786710817  | 4.268964586  |                 |              |              |              |
| 8 | -3.747375685 | -2.310622450 | -2.127733134 |                 |              |              |              |
| 8 | -1.079440562 | -4.122461385 | -3.223134593 |                 |              |              |              |
| 8 | 1.950725988  | -2.430147858 | -3.907107669 |                 |              |              |              |
| 8 | 3.136291176  | 1.308612982  | -3.979505176 |                 |              |              |              |
| 8 | 1.061489876  | 4.190025956  | -2.937614026 |                 |              |              |              |
| 8 | -2.294227324 | 4.244861737  | -1.958242380 |                 |              |              |              |
| 8 | -4.624263664 | 1.398754682  | -1.658321233 |                 |              |              |              |
| 7 | -4.085521057 | -2.344962294 | 2.296836896  |                 |              |              |              |
| 7 | -2.975875106 | -4.203313858 | 1.788340082  |                 |              |              |              |
| 7 | -0.978157156 | -5.358828465 | 1.061515645  |                 |              |              |              |

|   |              |              |              |   |              |              |              |
|---|--------------|--------------|--------------|---|--------------|--------------|--------------|
| 7 | 1.153520579  | -5.393094058 | 0.437289872  | 6 | -4.605993356 | -1.302545646 | 3.143940620  |
| 7 | 3.232656583  | -4.279421132 | -0.082156698 | 1 | -4.048736191 | -1.351496944 | 4.086789213  |
| 7 | 4.541711315  | -2.494753106 | -0.280353390 | 1 | -5.675816834 | -1.483544141 | 3.317153189  |
| 7 | 5.134051541  | -0.156280765 | -0.198789974 | 6 | -3.975458675 | -2.725179633 | -1.013641117 |
| 7 | 4.832922188  | 2.020854311  | 0.129228414  | 6 | -3.080146766 | -4.992082723 | -1.385212370 |
| 7 | 3.571709861  | 3.997023997  | 0.726362843  | 1 | -3.272380404 | -4.686123877 | -2.420090935 |
| 7 | 1.765840892  | 5.112687999  | 1.378117282  | 1 | -3.590589067 | -5.931755447 | -1.152114225 |
| 7 | -0.566868039 | 5.154624253  | 2.052331921  | 6 | -0.786208785 | -4.739457979 | -2.222878520 |
| 7 | -2.484992744 | 4.118942330  | 2.483585250  | 6 | 1.585462924  | -5.044001084 | -2.785196853 |
| 7 | -3.951149575 | 2.203147051  | 2.721915331  | 1 | 1.176411860  | -4.732864771 | -3.753225842 |
| 7 | -4.433052443 | 0.032569195  | 2.628362379  | 1 | 2.093438007  | -6.010541236 | -2.868055511 |
| 7 | -4.689993414 | -2.080501204 | -0.037524528 | 6 | 2.692632550  | -2.849148708 | -3.042540304 |
| 7 | -3.606162626 | -3.954410287 | -0.535936442 | 6 | 4.446135143  | -1.119192529 | -3.260283409 |
| 7 | -1.660513728 | -5.180391726 | -1.270060643 | 1 | 3.869138705  | -0.928298055 | -4.172662550 |
| 7 | 0.468234615  | -5.170372536 | -1.887353810 | 1 | 5.480747954  | -1.390481870 | -3.507870559 |
| 7 | 2.551262706  | -4.046141878 | -2.396174030 | 6 | 3.835193015  | 1.248709425  | -2.995373022 |
| 7 | 3.827929123  | -2.235243386 | -2.586057523 | 6 | 3.851452018  | 3.665940430  | -2.521606772 |
| 7 | 4.445555053  | 0.114295423  | -2.514093005 | 1 | 3.344940845  | 3.634243424  | -3.493557030 |
| 7 | 4.222733441  | 2.308936604  | -2.215056637 | 1 | 4.755228944  | 4.284893466  | -2.567314554 |
| 7 | 2.925434628  | 4.264324415  | -1.593135654 | 6 | 1.622426465  | 4.543345378  | -1.926338114 |
| 7 | 1.098455535  | 5.360411785  | -0.955327710 | 6 | -0.191850821 | 5.987569248  | -1.082984078 |
| 7 | -1.239872413 | 5.414353530  | -0.278819611 | 1 | -0.094909288 | 7.049257321  | -0.831739908 |
| 7 | -3.157526325 | 4.383900103  | 0.169114387  | 1 | -0.497572596 | 5.853253764  | -2.127138553 |
| 7 | -4.609573441 | 2.454834954  | 0.388184412  | 6 | -2.222137647 | 4.615529072  | -0.809737562 |
| 7 | -5.080256919 | 0.284514949  | 0.298299095  | 6 | -4.441722584 | 3.796224108  | -0.108414086 |
| 6 | -3.068542944 | -3.179503826 | 2.693942269  | 1 | -4.528512056 | 3.735423450  | -1.199871926 |
| 6 | -2.095973691 | -5.331123532 | 1.969491696  | 1 | -5.224058817 | 4.437356152  | 0.315017709  |
| 1 | -1.681058377 | -5.243257967 | 2.980472178  | 6 | -4.731784626 | 1.377879382  | -0.454011165 |
| 1 | -2.673059960 | -6.256802464 | 1.861522362  | 6 | -5.522438558 | -0.939896566 | -0.313929004 |
| 6 | 0.305925430  | -5.106939062 | 1.478322586  | 1 | -6.545593883 | -1.161020677 | 0.017080576  |
| 6 | 2.584391936  | -5.383247943 | 0.581377106  | 1 | -5.491040506 | -0.770466001 | -1.396665735 |
| 1 | 2.793658756  | -5.273203286 | 1.651899811  | 6 | -4.809229295 | -2.870562613 | 1.161616641  |
| 1 | 2.994194970  | -6.324520721 | 0.196762945  | 1 | -5.867977679 | -3.007471408 | 1.423627553  |
| 6 | 3.834577862  | -3.261979540 | 0.611180733  | 6 | -4.043046759 | -4.173295705 | 0.815298456  |
| 6 | 5.492644480  | -1.504915959 | 0.150265757  | 1 | -4.636526166 | -5.096126099 | 0.881771161  |
| 1 | 5.526344734  | -1.550394244 | 1.245141683  | 6 | -1.019160134 | -5.967754361 | -0.249298985 |
| 1 | 6.476030598  | -1.739616605 | -0.278682406 | 1 | -1.490865713 | -6.958532913 | -0.184629752 |
| 6 | 4.877201257  | 0.798031362  | 0.752421072  | 6 | 0.468018452  | -5.976446679 | -0.690933377 |
| 6 | 4.792770969  | 3.250922303  | 0.876089349  | 1 | 0.882183072  | -6.971955244 | -0.905268010 |
| 1 | 4.867690424  | 2.976416361  | 1.935059830  | 6 | 3.624454146  | -4.300380080 | -1.472247357 |
| 1 | 5.636067603  | 3.884927671  | 0.574586234  | 1 | 4.114272211  | -5.255377678 | -1.709362259 |
| 6 | 2.663204158  | 4.141598118  | 1.744597884  | 6 | 4.523943240  | -3.045345077 | -1.613945914 |
| 6 | 0.772337982  | 5.630108877  | 2.281672044  | 1 | 5.551031199  | -3.243207979 | -1.951875235 |
| 1 | 0.775067523  | 6.724046285  | 2.221592123  | 6 | 5.414374296  | 0.420076027  | -1.490542649 |
| 1 | 1.055818320  | 5.288385430  | 3.283937042  | 1 | 6.421222172  | 0.121943091  | -1.820438394 |
| 6 | -1.169461808 | 4.225146330  | 2.860743809  | 6 | 5.232144602  | 1.942461506  | -1.256896813 |
| 6 | -3.465010332 | 3.434739730  | 3.287223198  | 1 | 6.136737976  | 2.548969142  | -1.414735628 |
| 1 | -4.312649542 | 4.108897186  | 3.463091117  | 6 | 3.326072887  | 4.907015179  | -0.367629666 |
| 1 | -2.971857363 | 3.170273141  | 4.230076712  | 1 | 4.211900498  | 5.534982457  | -0.538474688 |
| 6 | -3.696069669 | 0.980879214  | 3.294980649  | 6 | 2.053485677  | 5.673924156  | 0.078444958  |



|   |              |              |              |                                  |              |              |              |
|---|--------------|--------------|--------------|----------------------------------|--------------|--------------|--------------|
| 1 | 2.170790401  | 6.763224665  | 0.164278402  | 1                                | 2.070165959  | -0.757325801 | -0.615991685 |
| 6 | -1.482821660 | 5.744315867  | 1.103595155  | 1                                | -1.488014877 | -2.141556577 | -3.763762518 |
| 1 | -1.496388077 | 6.835712212  | 1.232058776  | 1                                | -1.121515463 | -0.748839086 | -4.631090333 |
| 6 | -2.824224956 | 5.028409519  | 1.413118687  | 1                                | 0.088797429  | -1.830436111 | -4.190230607 |
| 1 | -3.642767537 | 5.690128339  | 1.729860607  | <hr/>                            |              |              |              |
| 6 | -5.003946038 | 2.138933299  | 1.737407520  | <b>CB[7]•G3 unstable complex</b> |              |              |              |
| 1 | -5.837714852 | 2.787780607  | 2.045421108  | 8                                | -0.842990169 | 4.211123394  | 2.879903492  |
| 6 | -5.339340045 | 0.626022429  | 1.672462212  | 8                                | -3.507138596 | 1.743424153  | 2.776210821  |
| 1 | -6.376882834 | 0.371295872  | 1.937033213  | 8                                | -3.539224678 | -1.916159158 | 2.854481237  |
| 6 | -1.465540804 | 0.898074486  | -0.921154455 | 8                                | -0.578497544 | -4.669760117 | 2.773561327  |
| 6 | -0.223683516 | 1.774487780  | -1.056840187 | 8                                | 3.025732731  | -4.021331810 | 2.726308857  |
| 6 | 0.965471852  | 0.904057691  | -1.449169055 | 8                                | 4.641370141  | -0.342974439 | 2.760360510  |
| 6 | -1.762005776 | 0.210436726  | -2.255286567 | 8                                | 2.703563202  | 3.103129074  | 2.686555925  |
| 6 | -0.337102552 | -1.691965254 | -1.521672434 | 8                                | -1.203365530 | 4.465903428  | -3.360106845 |
| 6 | 0.669764727  | 0.222589559  | -2.780356839 | 8                                | -4.522958087 | 2.227596204  | -3.353590767 |
| 6 | -0.563546671 | -0.656314035 | -2.619878643 | 8                                | -3.709587607 | -1.639270178 | -3.253460546 |
| 6 | 0.066289497  | 2.466414754  | 0.265071195  | 8                                | -0.637704668 | -3.984872463 | -3.209222567 |
| 6 | -0.921784283 | 0.565798381  | 1.520875888  | 8                                | 2.585199626  | -3.453937697 | -3.282445057 |
| 6 | 0.317449468  | 1.439517971  | 1.357396276  | 8                                | 4.028099450  | -0.247194030 | -3.370111729 |
| 6 | 1.507153753  | 0.560113116  | 0.984871487  | 8                                | 2.731360559  | 3.380786639  | -3.510373579 |
| 6 | 1.747071009  | -0.467153157 | 2.085985361  | 7                                | 0.031846523  | 5.130875560  | 0.970270166  |
| 6 | 0.505932545  | -1.340525537 | 2.233766413  | 7                                | -2.153544856 | 4.725473060  | 1.067810970  |
| 6 | -0.676622884 | -0.459794164 | 2.620508196  | 7                                | -4.002973912 | 3.190786071  | 1.066832485  |
| 6 | -1.222876257 | -0.123009945 | 0.190868995  | 7                                | -4.896542022 | 1.146485562  | 1.057048945  |
| 6 | 0.209405760  | -2.034850438 | 0.906799098  | 7                                | -4.800948646 | -1.258620694 | 1.057238785  |
| 6 | 1.212154714  | -0.126434905 | -0.347363713 | 7                                | -3.714118391 | -3.207786179 | 0.950558536  |
| 6 | -0.032375981 | -1.004671513 | -0.192656912 | 7                                | -1.920982906 | -4.859721999 | 0.914408537  |
| 7 | -0.799031162 | -1.386448824 | -3.897798562 | 7                                | 0.163779595  | -5.686007646 | 0.840769529  |
| 1 | 0.673266936  | -2.099709510 | 3.007255247  | 7                                | 2.609360030  | -5.247527950 | 0.817709203  |
| 1 | -2.309937690 | 1.536768133  | -0.652092990 | 7                                | 4.268473848  | -3.729481793 | 0.809755970  |
| 1 | -0.397323375 | 2.527144329  | -1.833555796 | 7                                | 5.140270916  | -1.430842948 | 0.780889908  |
| 1 | 1.847713459  | 1.542181668  | -1.550431139 | 7                                | 5.096847120  | 0.807432783  | 0.824988829  |
| 1 | -2.665978099 | -0.392210571 | -2.177119454 | 7                                | 4.011354154  | 2.976642162  | 0.804739569  |
| 1 | -1.933396750 | 0.984325578  | -3.004468861 | 7                                | 2.344098028  | 4.465464401  | 0.878180845  |
| 1 | 0.493484764  | -2.343706520 | -1.786799068 | 7                                | -0.083652882 | 5.125435288  | -1.456347732 |
| 1 | -1.237848845 | -2.294747807 | -1.407629328 | 7                                | -2.294752321 | 4.759380645  | -1.358298148 |
| 1 | 0.506636670  | 0.993585556  | -3.534612481 | 7                                | -4.243859147 | 3.315928579  | -1.339767260 |
| 1 | 1.521253266  | -0.376175183 | -3.092645556 | 7                                | -5.137967798 | 1.270927121  | -1.352204525 |
| 1 | 0.942954039  | 3.103482482  | 0.163150306  | 7                                | -4.901598483 | -1.142763893 | -1.353306810 |
| 1 | -0.783764741 | 3.083373611  | 0.550815150  | 7                                | -3.823603082 | -3.096709588 | -1.470479774 |
| 1 | -1.765501420 | 1.204910374  | 1.805687530  | 7                                | -1.987416460 | -4.677371100 | -1.487061272 |
| 1 | 0.531773064  | 1.948534069  | 2.306444867  | 7                                | 0.102119697  | -5.438408371 | -1.582772903 |
| 1 | 2.396092864  | 1.194708156  | 0.891378005  | 7                                | 2.462980450  | -5.022382204 | -1.605652257 |
| 1 | 1.958041220  | 0.052099997  | 3.025433741  | 7                                | 4.146463235  | -3.574996851 | -1.603898798 |
| 1 | 2.620637092  | -1.082690929 | 1.865502040  | 7                                | 5.078656050  | -1.362536739 | -1.649340508 |
| 1 | -1.562801655 | -1.071628350 | 2.785262899  | 7                                | 4.960752810  | 0.862224223  | -1.586531259 |
| 1 | -0.471480218 | 0.056306767  | 3.562976100  | 7                                | 3.992631345  | 3.072603385  | -1.618404691 |
| 1 | -2.115087385 | -0.751675976 | 0.313020432  | 7                                | 2.256282411  | 4.478681757  | -1.538104246 |
| 1 | 1.057353728  | -2.672435228 | 0.646658646  | 6                                | -0.974658326 | 4.633012481  | 1.759853899  |
| 1 | -0.673079896 | -2.668282089 | 1.027779254  | 6                                | -3.419291635 | 4.368226503  | 1.652231688  |

|   |              |              |              |   |              |              |              |
|---|--------------|--------------|--------------|---|--------------|--------------|--------------|
| 1 | -3.228495597 | 4.148499431  | 2.709298290  | 6 | 2.968910677  | 3.612781073  | -2.357892951 |
| 1 | -4.119841546 | 5.207608551  | 1.554573059  | 6 | 1.219987338  | 5.347600418  | -2.053297474 |
| 6 | -4.069789007 | 1.994530485  | 1.744401033  | 1 | 1.511533772  | 6.396458301  | -1.898699595 |
| 6 | -5.361908778 | -0.082228820 | 1.655190172  | 1 | 1.127530136  | 5.138733213  | -3.125743587 |
| 1 | -5.032200455 | -0.074686509 | 2.701370483  | 6 | -0.481580305 | 5.754912436  | -0.220535851 |
| 1 | -6.457867188 | -0.118194933 | 1.593662082  | 1 | -0.211632860 | 6.824383676  | -0.233532782 |
| 6 | -3.957645017 | -2.107187212 | 1.746073867  | 6 | -2.010846901 | 5.485203393  | -0.145402673 |
| 6 | -3.153460052 | -4.419818932 | 1.516695207  | 1 | -2.628948044 | 6.397430938  | -0.094440812 |
| 1 | -2.929670851 | -4.201782888 | 2.568196329  | 6 | -4.897261898 | 3.220758947  | -0.056980922 |
| 1 | -3.901308090 | -5.224681023 | 1.444444760  | 1 | -5.632471303 | 4.034396707  | 0.060299477  |
| 6 | -0.751736989 | -5.026584174 | 1.643546073  | 6 | -5.519434156 | 1.794242984  | -0.064841135 |
| 6 | 1.496651493  | -6.034380642 | 1.310711667  | 1 | -6.616544090 | 1.777705093  | 0.045927284  |
| 1 | 1.476728889  | -5.876485232 | 2.395695348  | 6 | -5.302184034 | -1.839675368 | -0.154980947 |
| 1 | 1.680294739  | -7.089245789 | 1.073283762  | 1 | -6.400659298 | -1.929027630 | -0.114751976 |
| 6 | 3.263740340  | -4.298004572 | 1.586143118  | 6 | -4.547248719 | -3.194532964 | -0.231653640 |
| 6 | 5.220613992  | -2.777055543 | 1.331434172  | 1 | -5.203291588 | -4.080793501 | -0.241578754 |
| 1 | 6.237848331  | -3.163819826 | 1.174244452  | 6 | -1.881686080 | -5.553272256 | -0.346963389 |
| 1 | 5.007481761  | -2.683258684 | 2.403339988  | 1 | -2.658041498 | -6.334583708 | -0.386166757 |
| 6 | 4.922065839  | -0.331222695 | 1.593359418  | 6 | -0.423390213 | -6.093709848 | -0.416902630 |
| 6 | 5.039988699  | 2.131288044  | 1.379667576  | 1 | -0.346753748 | -7.187088871 | -0.528762375 |
| 1 | 6.013452184  | 2.628690240  | 1.257309904  | 6 | 3.242689292  | -5.430521862 | -0.466789964 |
| 1 | 4.801417094  | 2.015034280  | 2.443742097  | 1 | 3.561246050  | -6.479175574 | -0.582717872 |
| 6 | 2.989096488  | 3.467989055  | 1.576862151  | 6 | 4.414596903  | -4.403523333 | -0.458090224 |
| 6 | 1.365507477  | 5.330964804  | 1.479213826  | 1 | 5.415637112  | -4.857290461 | -0.538397718 |
| 1 | 1.337198387  | 5.098217501  | 2.550206757  | 6 | 5.793144434  | -1.034214747 | -0.451309389 |
| 1 | 1.662046232  | 6.377243317  | 1.324307446  | 1 | 6.811847370  | -1.455507220 | -0.488073168 |
| 6 | -1.194214339 | 4.754779689  | -2.195870151 | 6 | 5.742110845  | 0.518164937  | -0.427127360 |
| 6 | -3.643633276 | 4.529808210  | -1.844691929 | 1 | 6.730831724  | 1.005919086  | -0.472051781 |
| 1 | -3.584597656 | 4.423987181  | -2.934547482 | 6 | 4.198970549  | 3.774701950  | -0.383619672 |
| 1 | -4.270741034 | 5.392162061  | -1.581285622 | 1 | 5.197282688  | 4.243430356  | -0.370337963 |
| 6 | -4.625003656 | 2.264748973  | -2.159946396 | 6 | 3.017098061  | 4.784512660  | -0.348108989 |
| 6 | -5.606653861 | 0.006360179  | -1.874354137 | 1 | 3.325467142  | 5.843528348  | -0.352863329 |
| 1 | -5.432586202 | 0.036527872  | -2.956799348 | 6 | 1.590494021  | -0.674596460 | -0.852418573 |
| 1 | -6.679526660 | -0.105343574 | -1.664883508 | 6 | 0.726648089  | -1.924860327 | -0.807165074 |
| 6 | -4.096769282 | -1.935223998 | -2.154125754 | 6 | -0.739944873 | -1.550096805 | -0.674562686 |
| 6 | -3.218561955 | -4.248879705 | -2.093494005 | 6 | 1.242072524  | 0.124086642  | -2.090993193 |
| 1 | -2.977725576 | -3.954787661 | -3.122301944 | 6 | -0.490961553 | 1.333085961  | -0.790506681 |
| 1 | -3.938271420 | -5.081065767 | -2.086530880 | 6 | -1.134887383 | -0.782378192 | -1.914200396 |
| 6 | -0.806784758 | -4.620034741 | -2.206464292 | 6 | -0.249244365 | 0.450950317  | -2.062603684 |
| 6 | 1.371024625  | -5.755193756 | -2.176928375 | 6 | 1.150556805  | -2.735560301 | 0.386871426  |
| 1 | 1.308927052  | -5.451373446 | -3.229524924 | 6 | 1.741558565  | -0.699228975 | 1.634768366  |
| 1 | 1.557149679  | -6.831810343 | -2.086372697 | 6 | 0.894049705  | -1.961570427 | 1.666712284  |
| 6 | 3.004236456  | -3.951029909 | -2.275595207 | 6 | -0.566295851 | -1.555973141 | 1.789282799  |
| 6 | 5.077955419  | -2.679058859 | -2.225959061 | 6 | -0.764079924 | -0.788287164 | 3.086538778  |
| 1 | 6.090600940  | -3.100503095 | -2.172970512 | 6 | 0.097903208  | 0.471627298  | 3.080741608  |
| 1 | 4.753698730  | -2.561493746 | -3.267594071 | 6 | 1.570752235  | 0.099237472  | 2.918217795  |
| 6 | 4.611570113  | -0.258047058 | -2.323414828 | 6 | 1.367944138  | 0.138317028  | 0.416206051  |
| 6 | 4.961244586  | 2.167684589  | -2.189988405 | 6 | -0.301848232 | 1.334176875  | 1.845632375  |
| 1 | 4.679077672  | 2.038172852  | -3.242191309 | 6 | -0.957833117 | -0.720127525 | 0.579999513  |
| 1 | 5.964380879  | 2.610526551  | -2.110799249 | 6 | -0.102130987 | 0.545509515  | 0.512402999  |

|   |              |              |              |   |              |              |              |
|---|--------------|--------------|--------------|---|--------------|--------------|--------------|
| 7 | -0.606751413 | 1.065651252  | -3.438316835 | 8 | -0.794200000 | 4.186500000  | 2.303800000  |
| 7 | -0.089112003 | 1.176880126  | 4.457850200  | 8 | -3.397000000 | 1.482600000  | 2.111000000  |
| 1 | 2.641523646  | -0.970089904 | -0.907474806 | 8 | -3.638600000 | -2.415500000 | 1.965300000  |
| 1 | 0.869833290  | -2.493006322 | -1.729349327 | 8 | -0.773100000 | -5.020700000 | 1.589300000  |
| 1 | -1.343920473 | -2.457867661 | -0.605322383 | 8 | 3.175000000  | -4.107400000 | 1.439600000  |
| 1 | 1.835134274  | 1.038505500  | -2.101553197 | 8 | 4.585900000  | -0.497700000 | 1.641000000  |
| 1 | 1.523527268  | -0.472303081 | -2.956918069 | 8 | 2.626800000  | 2.905100000  | 1.855600000  |
| 1 | -1.543227010 | 1.614847474  | -0.706778119 | 8 | -0.962800000 | 3.801600000  | -3.761300000 |
| 1 | 0.105316662  | 2.248290063  | -0.837153567 | 8 | -4.001400000 | 1.822300000  | -3.897400000 |
| 1 | -1.038831083 | -1.463939778 | -2.754964251 | 8 | -3.885800000 | -1.688800000 | -4.088900000 |
| 1 | -2.171863966 | -0.466814882 | -1.823374020 | 8 | -1.068300000 | -3.728100000 | -4.407200000 |
| 1 | 0.616278566  | -3.671451028 | 0.396130208  | 8 | 2.375600000  | -2.874600000 | -4.500900000 |
| 1 | 2.212851389  | -2.917720313 | 0.291762621  | 8 | 4.066500000  | 0.175800000  | -4.402900000 |
| 1 | 2.781931551  | -0.999396153 | 1.550285135  | 8 | 2.617300000  | 3.350500000  | -4.150800000 |
| 1 | 1.175342654  | -2.577314127 | 2.524632685  | 7 | 0.045700000  | 5.098800000  | 0.372900000  |
| 1 | -1.193474584 | -2.445491852 | 1.829390115  | 7 | -2.107200000 | 4.560400000  | 0.455400000  |
| 1 | -0.482078323 | -1.469587501 | 3.885329668  | 7 | -3.922600000 | 2.966000000  | 0.440000000  |
| 1 | -1.819711796 | -0.544636915 | 3.188287693  | 7 | -4.788400000 | 0.912100000  | 0.365900000  |
| 1 | 2.191321808  | 0.990046305  | 2.857187377  | 7 | -4.835000000 | -1.507600000 | 0.226300000  |
| 1 | 1.939129341  | -0.520557515 | 3.733288853  | 7 | -3.957500000 | -3.541800000 | -0.020000000 |
| 1 | 1.995321613  | 1.038970558  | 0.388172268  | 7 | -2.084800000 | -5.060700000 | -0.294900000 |
| 1 | -1.346395511 | 1.627957379  | 1.930548251  | 7 | 0.091900000  | -5.511900000 | -0.492200000 |
| 1 | 0.316562382  | 2.230609035  | 1.815755606  | 7 | 2.461300000  | -4.965500000 | -0.579600000 |
| 1 | -2.015700035 | -0.436878732 | 0.658565934  | 7 | 4.219500000  | -3.592600000 | -0.539000000 |
| 6 | 0.333041259  | 2.133603727  | -3.799548219 | 7 | 5.236600000  | -1.395300000 | -0.378800000 |
| 6 | -0.557754518 | 0.078566616  | -4.546448188 | 7 | 5.126000000  | 0.820400000  | -0.161700000 |
| 6 | -1.970937540 | 1.597164863  | -3.436281146 | 7 | 4.020900000  | 2.973000000  | 0.019800000  |
| 6 | 0.111879149  | 0.229504934  | 5.577843810  | 7 | 2.367300000  | 4.460000000  | 0.189400000  |
| 6 | 0.857222307  | 2.285841709  | 4.661449200  | 7 | -0.039800000 | 5.026500000  | -2.045000000 |
| 6 | -1.436233607 | 1.742256101  | 4.631287741  | 7 | -2.203900000 | 4.528400000  | -1.962600000 |
| 1 | -2.096771718 | 2.296555411  | -2.620453668 | 7 | -4.114900000 | 3.071000000  | -1.968500000 |
| 1 | -2.689166182 | 0.787070875  | -3.359508546 | 7 | -5.139100000 | 1.109700000  | -2.026500000 |
| 1 | -2.171957160 | 2.128714485  | -4.363310813 | 7 | -5.085600000 | -1.283300000 | -2.167300000 |
| 1 | 0.352182982  | -0.514026898 | -4.522628019 | 7 | -4.124700000 | -3.262500000 | -2.426200000 |
| 1 | -0.581970898 | 0.630555879  | -5.483946738 | 7 | -2.238000000 | -4.713700000 | -2.688500000 |
| 1 | -1.419412401 | -0.583991238 | -4.527064386 | 7 | -0.075000000 | -5.141300000 | -2.886400000 |
| 1 | 1.286596190  | 1.725436334  | -4.120530368 | 7 | 2.251600000  | -4.584600000 | -2.965700000 |
| 1 | 0.487479015  | 2.790190859  | -2.953926217 | 7 | 4.012700000  | -3.242200000 | -2.926300000 |
| 1 | -0.073560543 | 2.733604377  | -4.609756162 | 7 | 5.086700000  | -1.105400000 | -2.785500000 |
| 1 | 1.881878649  | 1.933058255  | 4.701305860  | 7 | 5.098100000  | 1.098000000  | -2.564100000 |
| 1 | 0.623888926  | 2.786734890  | 5.598774133  | 7 | 4.096900000  | 3.269900000  | -2.387700000 |
| 1 | 0.757644567  | 3.009823329  | 3.861538751  | 7 | 2.311400000  | 4.566800000  | -2.222100000 |
| 1 | -2.204739828 | 1.007345793  | 4.422436153  | 6 | -0.933200000 | 4.555400000  | 1.161800000  |
| 1 | -1.566585400 | 2.592837743  | 3.971773713  | 6 | -3.356900000 | 4.149500000  | 1.041700000  |
| 1 | -1.551976007 | 2.083530317  | 5.657868608  | 1 | -3.143800000 | 3.911000000  | 2.089500000  |
| 1 | 1.029716496  | -0.338716050 | 5.461028846  | 1 | -4.085100000 | 4.965000000  | 0.969900000  |
| 1 | -0.729493960 | -0.451983946 | 5.664627793  | 6 | -3.966800000 | 1.752700000  | 1.078700000  |
| 1 | 0.183330588  | 0.796605386  | 6.504363322  | 6 | -5.281700000 | -0.325700000 | 0.923400000  |
|   |              |              |              | 1 | -4.887200000 | -0.402500000 | 1.943300000  |
|   |              |              |              | 1 | -6.378600000 | -0.302700000 | 0.934400000  |

**CB[7]•G3 exclusion complex**

|   |              |              |              |   |              |              |              |
|---|--------------|--------------|--------------|---|--------------|--------------|--------------|
| 6 | -4.080100000 | -2.478600000 | 0.841900000  | 6 | -1.995300000 | 5.313100000  | -0.771800000 |
| 6 | -3.345700000 | -4.793400000 | 0.358400000  | 1 | -2.678900000 | 6.173200000  | -0.757200000 |
| 1 | -3.134300000 | -4.738200000 | 1.432600000  | 6 | -4.801900000 | 3.012900000  | -0.698900000 |
| 1 | -4.044100000 | -5.611800000 | 0.145300000  | 1 | -5.505500000 | 3.852100000  | -0.608100000 |
| 6 | -0.901700000 | -5.164700000 | 0.396100000  | 6 | -5.456600000 | 1.607600000  | -0.714000000 |
| 6 | 1.434300000  | -5.847400000 | -0.069600000 | 1 | -6.544200000 | 1.596900000  | -0.558300000 |
| 1 | 1.454600000  | -5.759000000 | 1.022800000  | 6 | -5.462900000 | -2.000100000 | -0.977200000 |
| 1 | 1.660800000  | -6.877000000 | -0.375800000 | 1 | -6.556700000 | -2.004700000 | -0.866000000 |
| 6 | 3.261700000  | -4.199000000 | 0.237500000  | 6 | -4.818500000 | -3.397300000 | -1.171000000 |
| 6 | 5.275800000  | -2.781500000 | 0.021700000  | 1 | -5.528800000 | -4.235000000 | -1.219900000 |
| 1 | 6.246800000  | -3.207800000 | -0.258500000 | 6 | -1.980400000 | -5.636100000 | -1.614900000 |
| 1 | 5.143300000  | -2.807900000 | 1.109600000  | 1 | -2.639800000 | -6.512100000 | -1.701700000 |
| 6 | 4.928800000  | -0.374700000 | 0.488300000  | 6 | -0.465900000 | -5.941300000 | -1.756400000 |
| 6 | 5.043300000  | 2.086400000  | 0.525300000  | 1 | -0.220700000 | -6.998000000 | -1.937900000 |
| 1 | 6.014900000  | 2.593800000  | 0.470900000  | 6 | 3.048400000  | -5.117700000 | -1.892900000 |
| 1 | 4.787400000  | 1.854800000  | 1.565800000  | 1 | 3.282000000  | -6.175400000 | -2.082800000 |
| 6 | 2.965300000  | 3.385200000  | 0.797900000  | 6 | 4.277100000  | -4.171300000 | -1.860300000 |
| 6 | 1.390500000  | 5.296200000  | 0.844800000  | 1 | 5.247300000  | -4.664200000 | -2.019000000 |
| 1 | 1.388000000  | 5.025800000  | 1.906300000  | 6 | 5.857400000  | -0.900900000 | -1.585300000 |
| 1 | 1.679300000  | 6.344400000  | 0.712500000  | 1 | 6.859600000  | -1.337500000 | -1.701400000 |
| 6 | -1.058000000 | 4.386000000  | -2.704100000 | 6 | 5.827700000  | 0.640000000  | -1.411300000 |
| 6 | -3.510300000 | 4.260600000  | -2.503200000 | 1 | 6.815300000  | 1.121300000  | -1.370300000 |
| 1 | -3.392000000 | 4.090200000  | -3.579400000 | 6 | 4.249200000  | 3.874500000  | -1.091400000 |
| 1 | -4.160900000 | 5.123000000  | -2.316800000 | 1 | 5.240200000  | 4.340700000  | -1.005400000 |
| 6 | -4.366800000 | 1.976500000  | -2.752600000 | 6 | 3.050400000  | 4.853700000  | -1.013800000 |
| 6 | -5.721000000 | -0.068300000 | -2.602000000 | 1 | 3.320100000  | 5.918000000  | -0.974300000 |
| 1 | -5.569200000 | 0.002200000  | -3.685200000 | 6 | 1.674700000  | -1.243300000 | 1.398200000  |
| 1 | -6.788500000 | -0.109000000 | -2.357700000 | 6 | 0.697800000  | -2.372200000 | 1.686300000  |
| 6 | -4.305900000 | -2.035000000 | -3.007500000 | 6 | -0.716100000 | -1.840100000 | 1.514600000  |
| 6 | -3.554400000 | -4.365200000 | -3.145100000 | 6 | 1.490300000  | -0.701800000 | -0.025200000 |
| 1 | -3.457100000 | -4.045100000 | -4.189200000 | 6 | -0.183000000 | 0.929100000  | 0.829300000  |
| 1 | -4.211000000 | -5.238700000 | -3.061100000 | 6 | -0.914800000 | -1.329000000 | 0.082900000  |
| 6 | -1.118400000 | -4.435800000 | -3.426400000 | 6 | 0.059600000  | -0.180300000 | -0.199800000 |
| 6 | 1.169400000  | -5.297900000 | -3.581600000 | 6 | 0.896800000  | -2.894500000 | 3.105700000  |
| 1 | 1.030600000  | -4.867500000 | -4.580400000 | 6 | 1.641700000  | -0.629200000 | 3.841200000  |
| 1 | 1.423400000  | -6.362900000 | -3.643900000 | 6 | 0.661700000  | -1.769800000 | 4.104100000  |
| 6 | 2.824100000  | -3.489600000 | -3.559400000 | 6 | -0.757900000 | -1.227100000 | 3.954300000  |
| 6 | 5.001100000  | -2.358100000 | -3.478500000 | 6 | -0.995900000 | -0.093400000 | 4.956100000  |
| 1 | 5.977700000  | -2.855200000 | -3.465300000 | 6 | -0.015000000 | 1.053300000  | 4.683900000  |
| 1 | 4.690200000  | -2.128700000 | -4.504600000 | 6 | 1.418300000  | 0.526000000  | 4.821800000  |
| 6 | 4.669300000  | 0.067000000  | -3.358300000 | 6 | 1.454500000  | -0.126800000 | 2.411200000  |
| 6 | 5.098100000  | 2.461500000  | -3.020300000 | 6 | -0.216700000 | 1.535000000  | 3.246800000  |
| 1 | 4.857500000  | 2.440700000  | -4.089400000 | 6 | -0.954100000 | -0.726600000 | 2.525800000  |
| 1 | 6.087000000  | 2.901600000  | -2.849400000 | 6 | 0.034600000  | 0.401200000  | 2.254800000  |
| 6 | 2.963400000  | 3.679100000  | -3.037500000 | 7 | -0.151900000 | 0.366800000  | -1.638900000 |
| 6 | 1.203700000  | 5.353100000  | -2.691900000 | 7 | -0.261500000 | 2.223600000  | 5.657500000  |
| 1 | 1.417500000  | 6.418700000  | -2.547200000 | 1 | 2.690700000  | -1.625800000 | 1.506200000  |
| 1 | 1.090600000  | 5.121700000  | -3.757300000 | 1 | 0.867500000  | -3.190300000 | 0.982300000  |
| 6 | -0.488000000 | 5.674500000  | -0.836900000 | 1 | -1.422200000 | -2.649600000 | 1.706000000  |
| 1 | -0.268900000 | 6.750500000  | -0.877800000 | 1 | 2.218400000  | 0.096900000  | -0.168700000 |

|   |              |              |              |   |              |              |              |
|---|--------------|--------------|--------------|---|--------------|--------------|--------------|
| 1 | 1.708600000  | -1.502100000 | -0.736200000 | 8 | 2.956040658  | 1.997673988  | -3.614744505 |
| 1 | -1.208700000 | 1.288700000  | 0.784700000  | 8 | 4.134639586  | -1.817801607 | 2.407823483  |
| 1 | 0.497500000  | 1.767000000  | 0.678800000  | 8 | 1.356114828  | -4.219609723 | 2.857265211  |
| 1 | -0.742800000 | -2.164400000 | -0.597600000 | 8 | -2.010510230 | -3.512826300 | 3.437456477  |
| 1 | -1.950600000 | -1.002600000 | -0.021600000 | 8 | -3.629558769 | -0.192617744 | 3.810529294  |
| 1 | 0.200000000  | -3.714800000 | 3.284300000  | 8 | -1.839282275 | 3.326469794  | 3.368843917  |
| 1 | 1.910200000  | -3.286100000 | 3.204800000  | 8 | 1.473691246  | 4.382571001  | 2.767045100  |
| 1 | 2.667500000  | -0.995700000 | 3.950700000  | 8 | 3.890832458  | 2.042980005  | 2.258261578  |
| 1 | 0.806100000  | -2.157500000 | 5.118600000  | 7 | 4.502020797  | -1.137743415 | -2.023539125 |
| 1 | -1.478600000 | -2.028700000 | 4.146000000  | 7 | 3.747877038  | -3.228450013 | -1.870695599 |
| 1 | -0.855500000 | -0.507900000 | 5.952800000  | 7 | 1.970969723  | -4.834839667 | -1.511108980 |
| 1 | -2.027300000 | 0.239200000  | 4.846400000  | 7 | -0.126859529 | -5.483966019 | -1.155788962 |
| 1 | 2.141800000  | 1.298000000  | 4.568500000  | 7 | -2.469968205 | -4.981145292 | -0.764910568 |
| 1 | 1.615600000  | 0.163000000  | 5.830300000  | 7 | -4.109565340 | -3.506006426 | -0.490553301 |
| 1 | 2.171700000  | 0.677300000  | 2.224200000  | 7 | -5.045456526 | -1.283474737 | -0.333235948 |
| 1 | -1.238800000 | 1.869000000  | 3.090700000  | 7 | -4.938321900 | 0.937259535  | -0.359307918 |
| 1 | 0.469100000  | 2.345000000  | 3.009600000  | 7 | -3.968961030 | 3.139492371  | -0.524662953 |
| 1 | -1.977600000 | -0.355600000 | 2.420100000  | 7 | -2.431182086 | 4.720207679  | -0.800152729 |
| 6 | 0.931500000  | 1.291100000  | -2.032600000 | 7 | -0.187992746 | 5.468558729  | -1.246410070 |
| 6 | -0.195400000 | -0.709600000 | -2.649100000 | 7 | 1.938913585  | 4.957798161  | -1.619685009 |
| 6 | -1.422200000 | 1.110200000  | -1.744400000 | 7 | 3.728894598  | 3.368424413  | -1.949072729 |
| 6 | -0.401400000 | 1.753200000  | 7.049400000  | 7 | 4.510902351  | 1.288936871  | -2.067309679 |
| 6 | 0.849700000  | 3.195900000  | 5.627100000  | 7 | 4.904678005  | -1.095010878 | 0.366585136  |
| 6 | -1.491900000 | 2.965600000  | 5.311000000  | 7 | 4.112170505  | -3.165314362 | 0.538736841  |
| 1 | -1.365000000 | 2.038800000  | -1.185100000 | 7 | 2.366226353  | -4.802193390 | 0.874382467  |
| 1 | -2.248600000 | 0.506800000  | -1.379400000 | 7 | 0.277902876  | -5.464952105 | 1.247620827  |
| 1 | -1.612100000 | 1.349500000  | -2.790700000 | 7 | -2.062438748 | -4.948717540 | 1.637905875  |
| 1 | 0.648800000  | -1.386100000 | -2.548900000 | 7 | -3.716331589 | -3.483482565 | 1.895391465  |
| 1 | -0.146000000 | -0.274300000 | -3.645700000 | 7 | -4.692708417 | -1.274332225 | 2.078696345  |
| 1 | -1.121700000 | -1.274200000 | -2.588300000 | 7 | -4.542392543 | 0.947917774  | 2.032293524  |
| 1 | 1.837700000  | 0.742000000  | -2.274700000 | 7 | -3.576189729 | 3.167833604  | 1.861401766  |
| 1 | 1.132000000  | 2.004900000  | -1.238800000 | 7 | -2.027252869 | 4.738865358  | 1.574262405  |
| 1 | 0.633200000  | 1.837300000  | -2.927700000 | 7 | 0.243574577  | 5.440738002  | 1.139144988  |
| 1 | 1.730900000  | 2.786900000  | 6.110800000  | 7 | 2.389505840  | 5.020683746  | 0.761681125  |
| 1 | 0.546200000  | 4.093400000  | 6.160200000  | 7 | 4.135250487  | 3.399016144  | 0.424830715  |
| 1 | 1.087500000  | 3.465900000  | 4.602900000  | 7 | 4.903732102  | 1.316341559  | 0.318742940  |
| 1 | -2.321800000 | 2.284200000  | 5.153000000  | 6 | 3.731037181  | -2.094331073 | -2.643854445 |
| 1 | -1.331200000 | 3.553600000  | 4.411900000  | 6 | 3.122601642  | -4.455189901 | -2.291640516 |
| 1 | -1.741900000 | 3.634300000  | 6.130700000  | 1 | 2.768847638  | -4.288171117 | -3.315916010 |
| 1 | 0.413500000  | 1.086700000  | 7.315300000  | 1 | 3.858129186  | -5.267995054 | -2.259492909 |
| 1 | -1.347800000 | 1.239300000  | 7.185500000  | 6 | 0.695634787  | -4.805853727 | -2.020114036 |
| 1 | -0.375200000 | 2.610100000  | 7.718700000  | 6 | -1.501154318 | -5.781775645 | -1.467439353 |

---

**CB[7]•G4**

|   |              |              |              |   |              |              |              |
|---|--------------|--------------|--------------|---|--------------|--------------|--------------|
| 8 | 3.175657078  | -1.968812860 | -3.710667652 | 1 | -1.693467302 | -6.839436140 | -1.256638759 |
| 8 | 0.368475228  | -4.313233694 | -3.075911154 | 6 | -3.154732144 | -3.955999618 | -1.368872134 |
| 8 | -2.987267201 | -3.555197693 | -2.497912526 | 6 | -5.164484652 | -2.608684433 | -0.883723679 |
| 8 | -4.560301184 | -0.210761607 | -2.314064081 | 1 | -5.098427048 | -2.502793949 | -1.973214075 |
| 8 | -2.785481631 | 3.223595697  | -2.501540691 | 1 | -6.129194200 | -3.040530423 | -0.590625013 |
| 8 | 0.357746327  | 4.342059218  | -3.170092271 | 6 | -4.803365665 | -0.191314572 | -1.129025319 |
|   |              |              |              | 6 | -5.011135263 | 2.245830425  | -0.954589979 |

|   |              |              |              |   |              |              |              |
|---|--------------|--------------|--------------|---|--------------|--------------|--------------|
| 1 | -4.894047297 | 2.102768754  | -2.035084449 | 6 | -2.964985668 | -5.273104213 | 0.559120294  |
| 1 | -5.987224177 | 2.696275202  | -0.729690859 | 1 | -3.262359025 | -6.329203127 | 0.623285021  |
| 6 | -3.033344127 | 3.642036615  | -1.392764765 | 6 | -4.119341050 | -4.252642351 | 0.742970734  |
| 6 | -1.587772333 | 5.633539532  | -1.529856305 | 1 | -5.110029219 | -4.698719164 | 0.910197971  |
| 1 | -1.889072959 | 6.660735210  | -1.302041994 | 6 | -5.537700377 | -0.907729358 | 0.970349666  |
| 1 | -1.724815773 | 5.416590167  | -2.595313361 | 1 | -6.548674275 | -1.316062793 | 1.119586917  |
| 6 | 0.668275995  | 4.859519136  | -2.119340761 | 6 | -5.452565748 | 0.641437832  | 0.953684171  |
| 6 | 3.096046873  | 4.587396517  | -2.393834366 | 1 | -6.413825323 | 1.154275150  | 1.110233570  |
| 1 | 3.829813043  | 5.399536421  | -2.365504935 | 6 | -4.039707611 | 3.897095725  | 0.701255637  |
| 1 | 2.751916490  | 4.414065061  | -3.419663748 | 1 | -5.060964395 | 4.266082262  | 0.866124026  |
| 6 | 3.657577345  | 2.192982670  | -2.641991006 | 6 | -2.964101695 | 4.997611678  | 0.508164999  |
| 6 | 4.911938050  | 0.062327501  | -2.713156487 | 1 | -3.335986667 | 6.029582383  | 0.564341978  |
| 1 | 4.430435420  | 0.035197610  | -3.697471215 | 6 | 0.495261215  | 6.077844423  | -0.133866254 |
| 1 | 6.004702378  | 0.062071322  | -2.824127952 | 1 | 0.256515074  | 7.148706209  | -0.078765912 |
| 6 | 4.343005218  | -2.002103911 | 1.230362568  | 6 | 1.987419680  | 5.752006712  | -0.412778688 |
| 6 | 3.699717064  | -4.372755775 | 1.206091022  | 1 | 2.634478482  | 6.627837520  | -0.557729808 |
| 1 | 3.702141769  | -4.153680397 | 2.280591476  | 6 | 4.710351053  | 3.322336818  | -0.892755013 |
| 1 | 4.404390144  | -5.179417401 | 0.969900290  | 1 | 5.464181574  | 4.108782578  | -1.032954026 |
| 6 | 1.327606487  | -4.751833308 | 1.771271906  | 6 | 5.249790531  | 1.870189293  | -0.967863560 |
| 6 | -0.917564846 | -5.744114430 | 2.000026019  | 1 | 6.329998105  | 1.781951189  | -1.145825234 |
| 1 | -0.689907173 | -5.502777089 | 3.044887531  | 6 | 0.935362999  | -1.069533335 | -1.311880210 |
| 1 | -1.169727718 | -6.804169293 | 1.887043311  | 6 | -0.459691378 | -1.666944642 | -1.165676577 |
| 6 | -2.527395928 | -3.923955843 | 2.423446064  | 6 | -1.487582884 | -0.539803874 | -1.120482661 |
| 6 | -4.604197776 | -2.606421259 | 2.617935160  | 6 | 1.000490366  | -0.268729596 | -2.605717465 |
| 1 | -4.194085101 | -2.505510509 | 3.629767244  | 6 | 0.265782950  | 1.761482574  | -1.339324654 |
| 1 | -5.604436684 | -3.055342499 | 2.644279169  | 6 | -1.421079367 | 0.272819824  | -2.413461310 |
| 6 | -4.208293196 | -0.178661396 | 2.748858481  | 6 | -0.020715798 | 0.859584565  | -2.540142422 |
| 6 | -4.423793059 | 2.267488321  | 2.605373260  | 6 | -0.520599289 | -2.482023015 | 0.114990223  |
| 1 | -3.975757102 | 2.136672935  | 3.597141882  | 6 | 1.166771127  | -0.989458035 | 1.191430384  |
| 1 | -5.422631640 | 2.715460906  | 2.695272945  | 6 | -0.225771370 | -1.601078113 | 1.317144854  |
| 6 | -2.421204758 | 3.700092830  | 2.369681860  | 6 | -1.261307076 | -0.484097669 | 1.383940563  |
| 6 | -0.950360387 | 5.635511754  | 1.921472465  | 6 | -0.975777566 | 0.386683273  | 2.600395702  |
| 1 | -1.297006439 | 6.667892757  | 1.808186453  | 6 | 0.410701979  | 1.000317342  | 2.454175104  |
| 1 | -0.685703938 | 5.429745215  | 2.964745772  | 6 | 1.455690745  | -0.107399224 | 2.405954237  |
| 6 | 1.377267905  | 4.885919574  | 1.669026456  | 6 | 1.232162630  | -0.181127904 | -0.103655224 |
| 6 | 3.742943211  | 4.634636311  | 1.055160956  | 6 | 0.487646715  | 1.831295532  | 1.173156011  |
| 1 | 3.801333363  | 4.476097063  | 2.137980481  | 6 | -1.199327167 | 0.338070631  | 0.096547600  |
| 1 | 4.426664051  | 5.430142806  | 0.742906151  | 6 | 0.198870997  | 0.948428285  | -0.043822559 |
| 6 | 4.264985056  | 2.226843226  | 1.121549657  | 7 | 0.092520257  | 1.667400705  | -3.786674906 |
| 6 | 5.507360346  | 0.121383457  | 0.845329790  | 7 | 0.653939085  | 1.892619835  | 3.622021264  |
| 1 | 6.577886837  | 0.120493402  | 0.599946387  | 1 | 1.661244980  | -1.885891709 | -1.349690276 |
| 1 | 5.362481170  | 0.133432408  | 1.931847590  | 1 | -0.673848707 | -2.315510640 | -2.022427827 |
| 6 | 5.232783883  | -1.686867830 | -0.905412017 | 1 | -2.481834105 | -0.983552321 | -1.030690442 |
| 1 | 6.315934382  | -1.618419960 | -1.088807976 | 1 | 1.999884190  | 0.132068212  | -2.749677686 |
| 6 | 4.689393392  | -3.135095859 | -0.783647131 | 1 | 0.789210902  | -0.937440563 | -3.441786334 |
| 1 | 5.448909193  | -3.925914083 | -0.877577039 | 1 | -0.478301921 | 2.557386724  | -1.306918046 |
| 6 | 2.052697247  | -5.595875687 | -0.287918519 | 1 | 1.255887383  | 2.205658367  | -1.439402648 |
| 1 | 2.777817330  | -6.414906661 | -0.396583167 | 1 | -1.644395759 | -0.394450652 | -3.247456661 |
| 6 | 0.589484953  | -6.046680699 | -0.036069647 | 1 | -2.172804339 | 1.061678204  | -2.408404618 |
| 1 | 0.436765617  | -7.134502861 | -0.001214915 | 1 | -1.511216001 | -2.918348302 | 0.223151577  |

|   |              |              |              |   |             |              |              |
|---|--------------|--------------|--------------|---|-------------|--------------|--------------|
| 1 | 0.209822736  | -3.286571561 | 0.064282268  | 6 | 6.608233964 | 0.498116729  | -1.211672822 |
| 1 | 1.897816637  | -1.800670642 | 1.159730882  | 1 | 6.365269289 | 0.470961360  | -2.280257257 |
| 1 | -0.273758313 | -2.202523237 | 2.231745400  | 1 | 7.691481163 | 0.557292042  | -1.055220384 |
| 1 | -2.252768489 | -0.934079676 | 1.480384937  | 6 | 6.440770966 | 0.499919960  | 2.348741342  |
| 1 | -1.034826932 | -0.233736418 | 3.496185012  | 1 | 7.529304546 | 0.617355615  | 2.289136533  |
| 1 | -1.727773255 | 1.165573446  | 2.689747030  | 1 | 6.102407051 | 0.480767494  | 3.391146073  |
| 1 | 2.460382802  | 0.310075951  | 2.345011331  | 7 | 6.127860682 | -0.732967149 | -0.640422104 |
| 1 | 1.408214907  | -0.731549118 | 3.299745189  | 6 | 6.651668978 | -1.304638365 | 0.573947593  |
| 1 | 2.236469451  | 0.246301652  | -0.208518288 | 1 | 7.744794983 | -1.202628314 | 0.604451914  |
| 1 | -0.239242972 | 2.642150138  | 1.215105219  | 7 | 6.071718545 | -0.763977628 | 1.778656227  |
| 1 | 1.487690923  | 2.255783756  | 1.084232237  | 6 | 5.357291357 | -1.620324528 | -1.342691098 |
| 1 | -1.945856770 | 1.139768731  | 0.144493925  | 8 | 4.814075248 | -1.403255271 | -2.403243197 |
| 1 | 1.090551462  | 1.886401454  | -3.961046621 | 6 | 5.270617806 | -1.659957304 | 2.433819544  |
| 1 | -0.279339454 | 1.149547526  | -4.587135047 | 8 | 4.708320724 | -1.474935281 | 3.492318013  |
| 1 | -0.405975058 | 2.566592542  | -3.699955166 | 7 | 5.375066661 | -2.820836211 | -0.685151627 |
| 1 | 1.469263450  | 2.505234543  | 3.465364690  | 6 | 6.119242965 | -2.761059601 | 0.546237354  |
| 1 | -0.169284400 | 2.507672759  | 3.757943379  | 1 | 6.888006185 | -3.545148668 | 0.567530763  |
| 1 | 0.801950252  | 1.342052651  | 4.471798113  | 7 | 5.302857699 | -2.836662924 | 1.733578538  |

---

**CB|8|•G1**

|   |             |             |              |   |              |              |              |
|---|-------------|-------------|--------------|---|--------------|--------------|--------------|
| 7 | 0.775654155 | 5.523730327 | -0.897951829 | 1 | 5.758539427  | -4.790594444 | -1.187356549 |
| 6 | 1.212489738 | 6.178854910 | 0.308465111  | 1 | 4.787552395  | -3.827101598 | -2.368551968 |
| 1 | 1.002946838 | 7.255914001 | 0.258500232  | 6 | 4.779054029  | -4.059658321 | 2.268657516  |
| 7 | 0.648532478 | 5.618686386 | 1.512074185  | 1 | 5.551797162  | -4.836781636 | 2.215222515  |
| 6 | 1.783014523 | 4.834502102 | -1.519144546 | 1 | 4.501728690  | -3.851388765 | 3.308517244  |
| 8 | 1.687469626 | 4.229185749 | -2.564318406 | 7 | 3.730286884  | -4.596028288 | -0.807153425 |
| 6 | 1.570443414 | 4.917079846 | 2.244910008  | 6 | 3.627739654  | -5.347789380 | 0.416061498  |
| 8 | 1.367738864 | 4.369784326 | 3.308744474  | 1 | 4.443549161  | -6.080940843 | 0.483291103  |
| 7 | 2.933416471 | 5.022912400 | -0.800798202 | 7 | 3.594516399  | -4.536700789 | 1.608023424  |
| 6 | 2.711737199 | 5.792931212 | 0.394606609  | 6 | 2.595816842  | -4.673488829 | -1.571839929 |
| 1 | 3.415095474 | 6.635200564 | 0.443639292  | 8 | 2.453389509  | -4.205387525 | -2.677852004 |
| 7 | 2.779586040 | 5.018519309 | 1.610438504  | 6 | 2.373334845  | -4.558540864 | 2.226419825  |
| 6 | 4.241403484 | 4.745081064 | -1.332686907 | 8 | 2.091373732  | -4.003619372 | 3.268011059  |
| 1 | 4.865875673 | 5.637916760 | -1.208939408 | 7 | 1.691818539  | -5.460237298 | -0.906156147 |
| 1 | 4.108662877 | 4.501441852 | -2.392896369 | 6 | 2.199056128  | -5.947141005 | 0.350011546  |
| 6 | 4.015175118 | 4.668525249 | 2.252532896  | 1 | 2.146092527  | -7.044135827 | 0.384777375  |
| 1 | 3.765025304 | 4.392039408 | 3.283392965  | 7 | 1.545810922  | -5.383480012 | 1.507727240  |
| 1 | 4.687750513 | 5.535861195 | 2.230844054  | 6 | 0.508477830  | -5.969145728 | -1.541003248 |
| 7 | 4.909549114 | 3.619044602 | -0.741795391 | 1 | 0.536314024  | -7.066854130 | -1.523514138 |
| 6 | 5.574540610 | 3.645172271 | 0.534966030  | 1 | 0.524947410  | -5.593013587 | -2.570245150 |
| 1 | 6.195010355 | 4.547379872 | 0.624294115  | 6 | 0.363436878  | -5.951138729 | 2.094344309  |
| 7 | 4.686451060 | 3.541295071 | 1.668479099  | 1 | 0.448846763  | -7.046852857 | 2.077885313  |
| 6 | 5.158066112 | 2.469189125 | -1.440382914 | 1 | 0.307592027  | -5.580345884 | 3.124351972  |
| 8 | 4.777654298 | 2.225015747 | -2.563048116 | 7 | -0.862110811 | -5.569163512 | 1.452980292  |
| 6 | 4.835007052 | 2.360154327 | 2.348876686  | 6 | -1.310799894 | -6.147323071 | 0.209643111  |
| 8 | 4.252445817 | 2.048553720 | 3.366394505  | 1 | -1.125305382 | -7.230073485 | 0.206556256  |
| 7 | 5.991348713 | 1.685934249 | -0.688833407 | 7 | -0.730663281 | -5.533210567 | -0.955354205 |
| 6 | 6.348152427 | 2.300937286 | 0.564342996  | 6 | -1.855354455 | -4.895355902 | 2.114903135  |
| 1 | 7.440010572 | 2.388101072 | 0.649255618  | 8 | -1.753815307 | -4.370383280 | 3.204033806  |
| 7 | 5.814926372 | 1.634175013 | 1.726412567  | 6 | -1.633084281 | -4.760584497 | -1.640883373 |
|   |             |             |              | 8 | -1.405447974 | -4.130742040 | -2.649343026 |

|   |              |              |              |   |              |              |              |
|---|--------------|--------------|--------------|---|--------------|--------------|--------------|
| 7 | -3.002982394 | -5.003582602 | 1.375083851  | 6 | -2.641051486 | 4.675186160  | 2.152141222  |
| 6 | -2.800866069 | -5.725209013 | 0.142843621  | 8 | -2.467104076 | 4.218630452  | 3.262332289  |
| 1 | -3.523922776 | -6.548545299 | 0.065414452  | 6 | -2.459689394 | 4.416666234  | -1.601015545 |
| 7 | -2.854570242 | -4.897685245 | -1.033646510 | 8 | -2.161280299 | 3.775371105  | -2.583315944 |
| 6 | -4.301365861 | -4.721133683 | 1.923512512  | 7 | -1.765905254 | 5.475119976  | 1.465394835  |
| 1 | -4.937822693 | -5.607087044 | 1.799928741  | 6 | -2.285311826 | 5.906670625  | 0.192357239  |
| 1 | -4.151471291 | -4.490431266 | 2.984391261  | 1 | -2.236479308 | 7.001278526  | 0.114366554  |
| 6 | -4.084880713 | -4.541416224 | -1.682201151 | 7 | -1.635141985 | 5.289962772  | -0.936073245 |
| 1 | -3.823454264 | -4.201814280 | -2.691217440 | 6 | -0.600777577 | 6.050218503  | 2.075558188  |
| 1 | -4.733566133 | -5.426517939 | -1.720057576 | 1 | -0.663773323 | 7.144636537  | 2.001680065  |
| 7 | -4.968221518 | -3.587260674 | 1.348762591  | 1 | -0.605933276 | 5.728834564  | 3.123243239  |
| 6 | -5.661735506 | -3.620235745 | 0.085801667  | 6 | -0.459720325 | 5.834070666  | -1.559973131 |
| 1 | -6.248147319 | -4.545343924 | 0.001774870  | 1 | -0.566487343 | 6.925933389  | -1.619818291 |
| 7 | -4.804458465 | -3.462866030 | -1.063204877 | 1 | -0.399099048 | 5.392248332  | -2.561118538 |
| 6 | -5.204522929 | -2.435685506 | 2.052126261  | 6 | 1.491627874  | 0.920658882  | -0.614535836 |
| 8 | -4.782390010 | -2.179505138 | 3.160590373  | 6 | 1.805001118  | -0.479701838 | -0.088893783 |
| 6 | -5.024942620 | -2.281415388 | -1.725793649 | 6 | 1.053839467  | -1.485558385 | -0.959699142 |
| 8 | -4.465449001 | -1.926977117 | -2.739126298 | 6 | 1.935243151  | 1.034216324  | -2.073797304 |
| 7 | -6.083912287 | -1.674590392 | 1.330223280  | 6 | -0.338899113 | 0.317833829  | -2.798507231 |
| 6 | -6.486938454 | -2.307383139 | 0.095223221  | 6 | 1.454802259  | -1.369128158 | -2.432538914 |
| 1 | -7.577785095 | -2.435290492 | 0.078674028  | 6 | 1.160440327  | 0.044183057  | -2.948089372 |
| 7 | -6.048467520 | -1.629476894 | -1.093871666 | 6 | 1.372715936  | -0.603983741 | 1.370190043  |
| 6 | -6.713391657 | -0.502450748 | 1.873248403  | 6 | -0.461259571 | 1.061124336  | 0.977841795  |
| 1 | -6.456503459 | -0.479478747 | 2.938799511  | 6 | -0.129458764 | -0.346474219 | 1.480121974  |
| 1 | -7.797648830 | -0.578994383 | 1.729400598  | 6 | -0.894936592 | -1.365534582 | 0.633303334  |
| 6 | -6.717518435 | -0.493500321 | -1.665244125 | 6 | -2.396433652 | -1.114869727 | 0.735250874  |
| 1 | -7.797415401 | -0.618647098 | -1.533863233 | 6 | -2.711471026 | 0.290249409  | 0.227714515  |
| 1 | -6.444768988 | -0.466269001 | -2.726586415 | 6 | -1.964086441 | 1.318145233  | 1.073379076  |
| 7 | -6.257559879 | 0.739802912  | 1.309762679  | 6 | -0.008080525 | 1.182695673  | -0.478442590 |
| 6 | -6.813561765 | 1.326636944  | 0.112966619  | 6 | -2.273174038 | 0.418842828  | -1.227499024 |
| 1 | -7.910098649 | 1.264289128  | 0.141262661  | 6 | -0.447171438 | -1.239447475 | -0.822910587 |
| 7 | -6.318635390 | 0.771659953  | -1.119017373 | 6 | -0.768796290 | 0.166361752  | -1.335622119 |
| 6 | -5.464860898 | 1.614599781  | 2.007638430  | 7 | 1.589604583  | 0.188833382  | -4.416256879 |
| 8 | -4.940472945 | 1.398986888  | 3.079784906  | 1 | -3.790203524 | 0.468418873  | 0.310220090  |
| 6 | -5.500988001 | 1.632811575  | -1.800748105 | 1 | 2.039144236  | 1.660554058  | -0.013734541 |
| 8 | -4.998586267 | 1.434605813  | -2.883002721 | 1 | 2.885013595  | -0.665037394 | -0.160774463 |
| 7 | -5.445886383 | 2.805406448  | 1.328227535  | 1 | 1.281948284  | -2.501561285 | -0.612465919 |
| 6 | -6.228721468 | 2.763047860  | 0.116812003  | 1 | 1.780084119  | 2.059709145  | -2.405514945 |
| 1 | -6.971781220 | 3.572525879  | 0.121107918  | 1 | 2.998779655  | 0.810530872  | -2.114251270 |
| 7 | -5.451116887 | 2.805704315  | -1.094648168 | 1 | -0.934019692 | -0.378579501 | -3.390306668 |
| 6 | -5.005065441 | 4.029152398  | 1.940573910  | 1 | -0.590875029 | 1.336503644  | -3.092335412 |
| 1 | -5.800532283 | 4.779383140  | 1.841547497  | 1 | 2.513750087  | -1.605566302 | -2.527038275 |
| 1 | -4.806977435 | 3.804151232  | 2.994886702  | 1 | 0.882017791  | -2.121943272 | -2.972194781 |
| 6 | -4.887998868 | 3.998826308  | -1.657217289 | 1 | 1.603369396  | -1.600538424 | 1.762147148  |
| 1 | -5.636127362 | 4.800795956  | -1.627889198 | 1 | 1.917521308  | 0.114645584  | 1.992871565  |
| 1 | -4.617736475 | 3.748483281  | -2.689740765 | 1 | 0.068695336  | 1.796415071  | 1.601240907  |
| 7 | -3.785503323 | 4.568436858  | 1.406066189  | 1 | -0.437680698 | -0.442614648 | 2.529919545  |
| 6 | -3.711475599 | 5.299129600  | 0.162773231  | 1 | -0.671244647 | -2.374690633 | 1.009499610  |
| 1 | -4.534396809 | 6.024081102  | 0.102646333  | 1 | -2.723423165 | -1.223541977 | 1.774379405  |
| 7 | -3.693931591 | 4.464159553  | -1.007775643 | 1 | -2.931404437 | -1.853859207 | 0.130977149  |



|   |              |              |              |   |              |             |              |
|---|--------------|--------------|--------------|---|--------------|-------------|--------------|
| 1 | -2.186633217 | 2.326810679  | 0.710947586  | 6 | -0.589454767 | 5.995121336 | -1.619839516 |
| 1 | -2.292560235 | 1.265337127  | 2.116477926  | 1 | -0.605640368 | 5.634625478 | -2.654840077 |
| 1 | -0.232482514 | 2.194950124  | -0.840365108 | 1 | -0.644299261 | 7.091227129 | -1.587009005 |
| 1 | -2.817715209 | -0.297122281 | -1.849190089 | 6 | -0.419381382 | 5.919919272 | 2.017330300  |
| 1 | -2.506160641 | 1.417336360  | -1.605829218 | 1 | -0.498496165 | 7.016027501 | 2.024404333  |
| 1 | -0.989660776 | -1.973362379 | -1.431346954 | 1 | -0.350117113 | 5.529114617 | 3.038998106  |
| 6 | 1.041549157  | 1.419717640  | -5.023216509 | 7 | 0.664868418  | 5.573704208 | -1.058099271 |
| 6 | 3.058521023  | 0.255057981  | -4.561079642 | 6 | 1.236544511  | 6.164655188 | 0.123378525  |
| 6 | 1.125390413  | -0.955649920 | -5.226048451 | 1 | 1.035466984  | 7.244547758 | 0.151833552  |
| 1 | 1.687692227  | -1.849696186 | -4.972520130 | 7 | 0.794305766  | 5.542341540 | 1.347687666  |
| 1 | 1.281089158  | -0.727813707 | -6.277492121 | 6 | 1.592591256  | 4.873875388 | -1.792784273 |
| 1 | 0.067833215  | -1.141767529 | -5.064566645 | 8 | 1.381816265  | 4.321009758 | -2.847252690 |
| 1 | 3.443215142  | 1.198837800  | -4.185669472 | 6 | 1.802022241  | 4.872709821 | 1.993282085  |
| 1 | 3.308125241  | 0.169592305  | -5.615002782 | 8 | 1.708768161  | 4.319664396 | 3.068830207  |
| 1 | 3.542453741  | -0.554601731 | -4.024181589 | 7 | 2.804605955  | 4.994760939 | -1.165939086 |
| 1 | -0.029769894 | 1.330742635  | -5.173917871 | 6 | 2.733895408  | 5.770814304 | 0.044515474  |
| 1 | 1.519066214  | 1.574174251  | -5.987324967 | 1 | 3.441864872  | 6.609891949 | 0.000999381  |
| 1 | 1.245460460  | 2.284385293  | -4.397047986 | 7 | 2.946399981  | 5.009831304 | 1.251977319  |

---

**CB|8|G2**

|   |              |             |              |   |             |              |              |
|---|--------------|-------------|--------------|---|-------------|--------------|--------------|
| 7 | -6.243851264 | 0.786983128 | -0.954626446 | 1 | 4.713251991 | 5.478471483  | -1.806318548 |
| 6 | -6.713212778 | 1.272680928 | 0.319802048  | 1 | 3.788866936 | 4.287729200  | -2.804734609 |
| 1 | -7.804309349 | 1.168059630 | 0.388709689  | 6 | 4.248932065 | 4.762258220  | 1.808600221  |
| 7 | -6.083365317 | 0.654143706 | 1.459914299  | 1 | 4.866280613 | 5.660494728  | 1.677966788  |
| 6 | -5.542886106 | 1.728857812 | -1.649096336 | 1 | 4.104179136 | 4.536418268  | 2.871407108  |
| 8 | -5.084984008 | 1.595793372 | -2.764617427 | 7 | 4.722482050 | 3.510504021  | -1.161054917 |
| 6 | -5.256475897 | 1.511739870 | 2.136689905  | 6 | 5.605718281 | 3.658377953  | -0.031086508 |
| 8 | -4.653423477 | 1.263479306 | 3.158823481  | 1 | 6.201345508 | 4.576485551  | -0.128833176 |
| 7 | -5.506982667 | 2.875404255 | -0.904860955 | 7 | 4.940257163 | 3.636818703  | 1.247325785  |
| 6 | -6.180395873 | 2.728976505 | 0.360859041  | 6 | 4.907305299 | 2.318458164  | -1.814702031 |
| 1 | -6.947231595 | 3.506224771 | 0.479855468  | 8 | 4.325938302 | 1.964589905  | -2.816468487 |
| 7 | -5.292646360 | 2.725767174 | 1.499469810  | 6 | 5.202265544 | 2.498356826  | 1.964458092  |
| 6 | -5.055414288 | 4.133512055 | -1.433810131 | 8 | 4.818220316 | 2.262653680  | 3.090523308  |
| 1 | -5.822543906 | 4.894109388 | -1.249758972 | 7 | 5.923883748 | 1.645383017  | -1.191429000 |
| 1 | -4.903172639 | 3.986427791 | -2.508882739 | 6 | 6.418309294 | 2.337489454  | -0.031996587 |
| 6 | -4.812450647 | 3.922388760 | 2.133241156  | 1 | 7.508753270 | 2.454525439  | -0.096427235 |
| 1 | -4.527166790 | 3.647957033 | 3.155385951  | 7 | 6.063855132 | 1.728320163  | 1.228527279  |
| 1 | -5.611241489 | 4.674639523 | 2.138002063  | 6 | 6.568529097 | 0.502115749  | -1.775657835 |
| 7 | -3.804591189 | 4.601381515 | -0.890036213 | 1 | 7.653656581 | 0.628917524  | -1.692195629 |
| 6 | -3.695381605 | 5.329808536 | 0.348752300  | 1 | 6.252715402 | 0.460855504  | -2.824760670 |
| 1 | -4.514343501 | 6.055404207 | 0.442230049  | 6 | 6.701981634 | 0.558764101  | 1.766505264  |
| 7 | -3.643133673 | 4.482561208 | 1.514379868  | 1 | 7.782403146 | 0.628778173  | 1.594420810  |
| 6 | -2.657287844 | 4.668164032 | -1.626873750 | 1 | 6.471982582 | 0.549280028  | 2.838347627  |
| 8 | -2.490683149 | 4.155843746 | -2.716522333 | 7 | 6.229869862 | -0.689444155 | 1.229309010  |
| 6 | -2.425345651 | 4.514724892 | 2.140258949  | 6 | 6.746931130 | -1.288977538 | 0.023542997  |
| 8 | -2.136728452 | 3.944469368 | 3.170555855  | 1 | 7.842893904 | -1.212869378 | 0.008762306  |
| 7 | -1.756702106 | 5.455192230 | -0.971623569 | 7 | 6.196812101 | -0.758010130 | -1.196919154 |
| 6 | -2.269309138 | 5.938536008 | 0.287552554  | 6 | 5.427992764 | -1.543120994 | 1.939000265  |
| 1 | -2.220907646 | 7.034840045 | 0.326570138  | 8 | 4.913892333 | -1.312342754 | 3.013979701  |
| 7 | -1.611800150 | 5.368005269 | 1.437681737  | 6 | 5.404447863 | -1.657711160 | -1.859607682 |
|   |              |             |              | 8 | 4.868334212 | -1.480039890 | -2.930517801 |

---

|   |              |              |              |   |              |              |              |
|---|--------------|--------------|--------------|---|--------------|--------------|--------------|
| 7 | 5.385657621  | -2.740585302 | 1.271348744  | 6 | -5.000751975 | -2.531420850 | 2.091594301  |
| 6 | 6.181527045  | -2.732630929 | 0.066178531  | 8 | -4.514898666 | -2.298985551 | 3.178496602  |
| 1 | 6.934191821  | -3.531986254 | 0.107875625  | 6 | -4.945810268 | -2.293030893 | -1.673533432 |
| 7 | 5.418869830  | -2.829739316 | -1.150428999 | 8 | -4.407089477 | -1.906206237 | -2.686703054 |
| 6 | 4.877249251  | -3.937093533 | 1.883103695  | 7 | -5.911194929 | -1.750610020 | 1.432650726  |
| 1 | 5.658537316  | -4.708485765 | 1.858088792  | 6 | -6.354016412 | -2.331672101 | 0.188582466  |
| 1 | 4.620027631  | -3.674192996 | 2.915929852  | 1 | -7.447507206 | -2.434091589 | 0.187256527  |
| 6 | 4.951943046  | -4.064019758 | -1.715207890 | 7 | -5.912367242 | -1.613496667 | -0.977655830 |
| 1 | 4.729418280  | -3.859220949 | -2.768874532 | 6 | -6.514642137 | -0.592903742 | 2.029514405  |
| 1 | 5.739230819  | -4.821719719 | -1.616314317 | 1 | -7.604791499 | -0.668941948 | 1.940286220  |
| 7 | 3.683717742  | -4.468448214 | 1.281262271  | 1 | -6.205188632 | -0.589796591 | 3.081083858  |
| 6 | 3.702848225  | -5.304783380 | 0.104682264  | 6 | -6.611175209 | -0.480358915 | -1.525889567 |
| 1 | 4.542693706  | -6.011148143 | 0.157541876  | 1 | -7.687598919 | -0.635310003 | -1.393283467 |
| 7 | 3.742645002  | -4.574900937 | -1.133538560 | 1 | -6.351318965 | -0.427577784 | -2.589422789 |
| 6 | 2.493905167  | -4.543009574 | 1.958850448  | 6 | -0.403436641 | -1.294581675 | -1.871344944 |
| 8 | 2.238848366  | -3.991212274 | 3.008826207  | 6 | -1.295879197 | -1.510128935 | -0.646876013 |
| 6 | 2.556928538  | -4.628990374 | -1.818389138 | 6 | -1.768245876 | -0.147270131 | -0.135691591 |
| 8 | 2.325718370  | -4.115498440 | -2.889823795 | 6 | -1.188352158 | -0.576510209 | -2.968365553 |
| 7 | 1.676376900  | -5.417196705 | 1.290457709  | 6 | -0.423327539 | 1.619584139  | -2.046940552 |
| 6 | 2.291247504  | -5.944767262 | 0.098126353  | 6 | -2.540918153 | 0.587273250  | -1.231501327 |
| 1 | 2.270789539  | -7.043186213 | 0.115475566  | 6 | -1.636000550 | 0.785381424  | -2.446411069 |
| 7 | 1.707346674  | -5.450698555 | -1.122086286 | 6 | -0.516448423 | -2.240543464 | 0.441702317  |
| 6 | 0.521507341  | -6.017905926 | 1.900574897  | 6 | 1.605416197  | -1.184910711 | -0.362573967 |
| 1 | 0.483980989  | -5.657873896 | 2.935158187  | 6 | 0.696522392  | -1.407703428 | 0.847545137  |
| 1 | 0.637715929  | -7.110270953 | 1.870525302  | 6 | 0.242994766  | -0.044762200 | 1.375298285  |
| 6 | 0.537350766  | -6.024426778 | -1.728419750 | 6 | 1.457855601  | 0.785959364  | 1.782344308  |
| 1 | 0.621656441  | -7.118865577 | -1.698922301 | 6 | 2.347438785  | 1.007007699  | 0.561334499  |
| 1 | 0.512754188  | -5.659715778 | -2.761949582 | 6 | 2.816038005  | -0.344420863 | 0.030839894  |
| 7 | -0.734964528 | -5.662916261 | 1.301315484  | 6 | 0.815163995  | -0.467379561 | -1.456773766 |
| 6 | -1.230230544 | -6.241560113 | 0.073198242  | 6 | 1.564034991  | 1.737165148  | -0.523219273 |
| 1 | -1.044439964 | -7.324600383 | 0.066059489  | 6 | -0.547346746 | 0.675302961  | 0.280161487  |
| 7 | -0.704855121 | -5.638297260 | -1.122187659 | 6 | 0.354246613  | 0.900946440  | -0.939973175 |
| 6 | -1.717320181 | -5.028787777 | 2.017298074  | 7 | -2.393761450 | 1.496527391  | -3.516826339 |
| 8 | -1.591370205 | -4.540293698 | 3.120725233  | 1 | 3.215647814  | 1.603387852  | 0.862448632  |
| 6 | -1.636630495 | -4.880971993 | -1.784798214 | 1 | -0.067151091 | -2.264831798 | -2.252339139 |
| 8 | -1.466603216 | -4.301384382 | -2.832847409 | 1 | -2.163212531 | -2.112559017 | -0.938546427 |
| 7 | -2.886073060 | -5.129989744 | 1.312368791  | 1 | -2.413652986 | -0.291869827 | 0.742025904  |
| 6 | -2.723117045 | -5.821570071 | 0.060189132  | 1 | -0.542666335 | -0.461566780 | -3.839226375 |
| 1 | -3.443559320 | -6.648622099 | -0.009786198 | 1 | -2.052932075 | -1.183611561 | -3.242179239 |
| 7 | -2.821307037 | -4.971539151 | -1.100377830 | 1 | -0.739127487 | 2.597601573  | -1.681867960 |
| 6 | -4.167356509 | -4.832468764 | 1.889549619  | 1 | 0.240753449  | 1.781518010  | -2.897500045 |
| 1 | -4.827063476 | -5.699228602 | 1.755301091  | 1 | -3.405765306 | -0.008080924 | -1.521729423 |
| 1 | -3.993719970 | -4.632309189 | 2.953114100  | 1 | -2.878521768 | 1.551884999  | -0.847588250 |
| 6 | -4.069785567 | -4.592626445 | -1.706701144 | 1 | -1.147679087 | -2.415805325 | 1.319414496  |
| 1 | -4.736498199 | -5.464581368 | -1.724571000 | 1 | -0.180073501 | -3.212013704 | 0.069050928  |
| 1 | -3.830047794 | -4.261597806 | -2.724018127 | 1 | 1.948974828  | -2.154844824 | -0.747437025 |
| 7 | -4.809071208 | -3.667573047 | 1.349619316  | 1 | 1.249333722  | -1.930081368 | 1.640206985  |
| 6 | -5.561198120 | -3.662332658 | 0.119128702  | 1 | -0.401602669 | -0.193404390 | 2.252671182  |
| 1 | -6.170912393 | -4.572777970 | 0.045662875  | 1 | 2.024404701  | 0.266936126  | 2.562351330  |
| 7 | -4.751206877 | -3.503513552 | -1.063034021 | 1 | 1.141575885  | 1.745654180  | 2.203491691  |

|   |              |              |              |   |             |             |              |
|---|--------------|--------------|--------------|---|-------------|-------------|--------------|
| 1 | 3.459290590  | -0.200926002 | -0.841806344 | 7 | 4.849483222 | 3.375919818 | 0.563696186  |
| 1 | 3.386733419  | -0.859798580 | 0.807301485  | 6 | 4.464453865 | 2.051434175 | -2.479200354 |
| 1 | 1.474278696  | -0.327238534 | -2.322377969 | 8 | 3.836315888 | 1.824269324 | -3.488602586 |
| 1 | 1.227864713  | 2.703797799  | -0.136069371 | 6 | 4.927026805 | 2.233793288 | 1.318990070  |
| 1 | 2.200265855  | 1.916825469  | -1.392831518 | 8 | 4.548613317 | 2.106945572 | 2.461757245  |
| 1 | -0.879404648 | 1.644202170  | 0.679112236  | 7 | 5.262061190 | 1.154027126 | -1.814250736 |
| 1 | -2.409695802 | 2.519966560  | -3.332796643 | 6 | 5.974925811 | 1.761568829 | -0.717733759 |
| 1 | -3.380135539 | 1.189523197  | -3.537565048 | 1 | 7.059210468 | 1.637336038 | -0.849480834 |
| 1 | -1.962857153 | 1.335862223  | -4.430843189 | 7 | 5.566387039 | 1.275800173 | 0.575274165  |

---

**CB[8]-G3**

---

|   |              |             |              |   |              |              |              |
|---|--------------|-------------|--------------|---|--------------|--------------|--------------|
| 7 | -3.310685868 | 5.121025149 | -0.991117037 | 1 | 6.762475618  | -0.087628103 | -2.535671195 |
| 6 | -3.195983663 | 5.924961476 | 0.199247287  | 1 | 5.179659182  | -0.128946828 | -3.401196963 |
| 1 | -4.068107346 | 6.585432299 | 0.300933717  | 6 | 6.118994153  | 0.094667106  | 1.181238154  |
| 7 | -3.007425560 | 5.151538293 | 1.402762217  | 1 | 7.206753999  | 0.086054838  | 1.031172973  |
| 6 | -2.226524830 | 5.250248446 | -1.821755336 | 1 | 5.874471480  | 0.149049169  | 2.248231832  |
| 8 | -2.092876367 | 4.716447667 | -2.899774027 | 7 | 5.273439270  | -1.263163639 | -1.698551910 |
| 6 | -1.762275809 | 5.332264368 | 1.951688911  | 6 | 5.985747951  | -1.758287092 | -0.544624863 |
| 8 | -1.369969476 | 4.847330146 | 2.988922485  | 1 | 7.069667404  | -1.654860903 | -0.684241407 |
| 7 | -1.362071085 | 6.146612756 | -1.250049617 | 7 | 5.570175439  | -1.134928854 | 0.684563232  |
| 6 | -1.836264168 | 6.648800017 | 0.016445976  | 6 | 4.451662722  | -2.210935262 | -2.250946365 |
| 1 | -1.887173198 | 7.745929846 | -0.007596234 | 8 | 3.748774423  | -2.052263063 | -3.225350217 |
| 7 | -1.073843492 | 6.212766252 | 1.159096562  | 6 | 4.813365362  | -1.967674865 | 1.464674181  |
| 6 | -0.228422445 | 6.675655104 | -1.958032691 | 8 | 4.315192115  | -1.685877401 | 2.531129122  |
| 1 | -0.214785892 | 7.765759449 | -1.849166561 | 7 | 4.587870355  | -3.372227058 | -1.537077575 |
| 1 | -0.354250549 | 6.385151921 | -3.007542892 | 6 | 5.465077278  | -3.213381935 | -0.405249308 |
| 6 | 0.186979200  | 6.781536961 | 1.549751362  | 1 | 6.238654247  | -3.992353046 | -0.401842133 |
| 1 | 0.316254581  | 6.554935421 | 2.614475463  | 7 | 4.756088239  | -3.191618380 | 0.850942223  |
| 1 | 0.158907634  | 7.863098194 | 1.377030599  | 6 | 4.202637567  | -4.661690396 | -2.051686147 |
| 7 | 1.039449537  | 6.147448307 | -1.535008670 | 1 | 5.073339486  | -5.328641113 | -2.013795563 |
| 6 | 1.795942890  | 6.659695749 | -0.420433308 | 1 | 3.872538569  | -4.513225657 | -3.086083561 |
| 1 | 1.832881473  | 7.756895408 | -0.461078397 | 6 | 4.361914390  | -4.381776377 | 1.555190739  |
| 7 | 1.327848334  | 6.226892543 | 0.873703188  | 1 | 5.190653607  | -5.101689749 | 1.535238461  |
| 6 | 1.738734989  | 5.229795612 | -2.274040755 | 1 | 4.139385094  | -4.078236594 | 2.584436695  |
| 8 | 1.352493933  | 4.679040676 | -3.280259857 | 7 | 3.180670869  | -5.013799289 | 1.033135673  |
| 6 | 2.204230078  | 5.377876898 | 1.497218934  | 6 | 3.202678925  | -5.929577547 | -0.080798260 |
| 8 | 2.077451119  | 4.907455294 | 2.605173670  | 1 | 4.098262909  | -6.564057334 | -0.043115858 |
| 7 | 2.986011679  | 5.097979487 | -1.716350846 | 7 | 3.100352460  | -5.273345671 | -1.361667426 |
| 6 | 3.164925048  | 5.943910862 | -0.561051616 | 6 | 2.032626507  | -5.126040608 | 1.777378723  |
| 1 | 4.028393210  | 6.608308887 | -0.702941421 | 8 | 1.764147161  | -4.474146143 | 2.760680273  |
| 7 | 3.290380282  | 5.214533137 | 0.675315093  | 6 | 1.910751807  | -5.534670312 | -1.990055289 |
| 6 | 4.072753044  | 4.479373392 | -2.426892403 | 8 | 1.601770105  | -5.173464510 | -3.102831027 |
| 1 | 3.689723230  | 4.218740481 | -3.420538508 | 7 | 1.264463996  | -6.122259913 | 1.238670342  |
| 1 | 4.903487904  | 5.193176491 | -2.503061528 | 6 | 1.851983922  | -6.683810789 | 0.049514265  |
| 6 | 4.525033014  | 4.649803590 | 1.144479963  | 1 | 1.931128201  | -7.775497845 | 0.138507615  |
| 1 | 5.341081080  | 5.356326158 | 0.944782643  | 7 | 1.161328521  | -6.328086887 | -1.165474789 |
| 1 | 4.405905344  | 4.484089317 | 2.221635319  | 6 | 0.168561873  | -6.725883166 | 1.954262871  |
| 7 | 4.552339998  | 3.259574036 | -1.835471053 | 1 | 0.222568891  | -7.812198437 | 1.829218945  |
| 6 | 5.473854532  | 3.228728920 | -0.727091809 | 1 | 0.270999516  | -6.447185474 | 3.009407011  |
| 1 | 6.253721905  | 3.991726357 | -0.860687513 | 6 | -0.127985178 | -6.833381698 | -1.545920629 |
|   |              |             |              | 1 | -0.232773079 | -6.620225203 | -2.616006332 |

|   |              |              |              |   |              |              |              |
|---|--------------|--------------|--------------|---|--------------|--------------|--------------|
| 1 | -0.171400580 | -7.910639744 | -1.355329689 | 1 | -4.922745300 | 5.281125171  | 2.190003806  |
| 7 | -1.125393764 | -6.257321501 | 1.544184413  | 1 | -3.700562627 | 4.367026146  | 3.156873100  |
| 6 | -1.812239001 | -6.692980326 | 0.353452154  | 6 | -4.539435924 | 4.519298103  | -1.428821492 |
| 1 | -1.880269085 | -7.788779079 | 0.330696657  | 1 | -5.361007340 | 5.231888620  | -1.278686495 |
| 7 | -1.230106513 | -6.198359323 | -0.867852768 | 1 | -4.413929821 | 4.285973030  | -2.492633015 |
| 6 | -1.880829308 | -5.419126609 | 2.317352350  | 6 | -1.326111767 | 1.361202030  | -1.192630667 |
| 8 | -1.573165038 | -4.983555344 | 3.403543093  | 6 | -0.086724820 | 2.242877202  | -1.310160134 |
| 6 | -2.009262035 | -5.245495789 | -1.466279079 | 6 | 1.142016712  | 1.339694085  | -1.388772224 |
| 8 | -1.747660041 | -4.652069057 | -2.487725789 | 6 | -1.449855439 | 0.447453217  | -2.409056175 |
| 7 | -3.074070958 | -5.210671624 | 1.676326630  | 6 | -0.097993925 | -1.283664441 | -1.227365066 |
| 6 | -3.170523439 | -5.945980838 | 0.438654949  | 6 | 1.039351878  | 0.440554340  | -2.618696789 |
| 1 | -4.059611447 | -6.590593930 | 0.441430025  | 6 | -0.208608341 | -0.445275692 | -2.518610653 |
| 7 | -3.158564772 | -5.100666195 | -0.729756028 | 6 | 0.014249753  | 3.156059804  | -0.096592110 |
| 6 | -4.182021023 | -4.569136097 | 2.329102873  | 6 | -1.126278485 | 1.433495631  | 1.309245477  |
| 1 | -3.853270393 | -4.355526976 | 3.352483144  | 6 | 0.108269222  | 2.321803642  | 1.173110782  |
| 1 | -5.046292758 | -5.245412732 | 2.331747339  | 6 | 1.341802263  | 1.426295188  | 1.112560366  |
| 6 | -4.346046355 | -4.511757962 | -1.286880381 | 6 | 1.460299244  | 0.591582222  | 2.384945245  |
| 1 | -5.168536345 | -5.236017276 | -1.220878947 | 6 | 0.213525271  | -0.284529976 | 2.551064542  |
| 1 | -4.127775928 | -4.270089156 | -2.333296074 | 6 | -1.028695850 | 0.613828357  | 2.593991436  |
| 7 | -4.579222509 | -3.316478966 | 1.738535835  | 6 | -1.233954989 | 0.529976114  | 0.085540817  |
| 6 | -5.457526311 | -3.233365877 | 0.599469742  | 6 | 0.097115319  | -1.203017110 | 1.316093147  |
| 1 | -6.225690260 | -4.016421668 | 0.644264720  | 6 | 1.244056094  | 0.515629707  | -0.109789920 |
| 7 | -4.749154875 | -3.283787153 | -0.656308111 | 6 | 0.002181985  | -0.371291410 | 0.016504149  |
| 6 | -4.452566677 | -2.113380673 | 2.381364190  | 7 | -0.319440819 | -1.333490947 | -3.772813421 |
| 8 | -3.752814489 | -1.890858158 | 3.345386959  | 7 | 0.319143780  | -1.091413815 | 3.859599621  |
| 6 | -4.815182972 | -2.100107286 | -1.343712692 | 1 | -2.215387419 | 2.000185730  | -1.152739063 |
| 8 | -4.320601095 | -1.880924869 | -2.426408655 | 1 | -0.154708924 | 2.853816704  | -2.218036903 |
| 7 | -5.280799327 | -1.206999359 | 1.772147318  | 1 | 2.034918838  | 1.965236478  | -1.493444896 |
| 6 | -5.988401094 | -1.776111936 | 0.649973991  | 1 | -2.355801019 | -0.146434956 | -2.292175073 |
| 1 | -7.073161215 | -1.672020195 | 0.782503348  | 1 | -1.569883145 | 1.078958022  | -3.289690429 |
| 7 | -5.576217116 | -1.225950431 | -0.614808791 | 1 | 0.795695402  | -1.906377033 | -1.260703989 |
| 6 | -5.682788190 | 0.011941899  | 2.420810345  | 1 | -0.971033386 | -1.930822942 | -1.126004759 |
| 1 | -6.775926491 | 0.013350499  | 2.530596201  | 1 | 0.996730176  | 1.105161399  | -3.479257224 |
| 1 | -5.196300296 | 0.028627648  | 3.402896965  | 1 | 1.944402646  | -0.163037097 | -2.702584224 |
| 6 | -6.128821254 | -0.029869397 | -1.183953518 | 1 | 0.898351196  | 3.790126247  | -0.184711048 |
| 1 | -7.216150821 | -0.031437070 | -1.031189240 | 1 | -0.863985050 | 3.802379699  | -0.049797152 |
| 1 | -5.886489670 | -0.040255846 | -2.252788581 | 1 | -2.015270463 | 2.069994464  | 1.374202401  |
| 7 | -5.275838626 | 1.212555155  | 1.740448469  | 1 | 0.180383787  | 2.989151240  | 2.040009438  |
| 6 | -5.987262298 | 1.751795126  | 0.608038116  | 1 | 2.234968774  | 2.055793040  | 1.031770276  |
| 1 | -7.071719189 | 1.636453462  | 0.745989646  | 1 | 1.584251936  | 1.277506373  | 3.223323172  |
| 7 | -5.577525443 | 1.187002706  | -0.652038987 | 1 | 2.362465028  | -0.014194536 | 2.306473123  |
| 6 | -4.476016436 | 2.147546158  | 2.348152379  | 1 | -1.937602242 | 0.022582905  | 2.715928918  |
| 8 | -3.846163741 | 1.981284589  | 3.368243845  | 1 | -0.981740157 | 1.331753632  | 3.410329571  |
| 6 | -4.934460964 | 2.096104432  | -1.451717720 | 1 | -2.135037465 | -0.090522346 | 0.174782018  |
| 8 | -4.551344878 | 1.897738600  | -2.582631139 | 1 | 0.966011359  | -1.860843874 | 1.256379767  |
| 7 | -4.563462989 | 3.314485680  | 1.632189438  | 1 | -0.800427211 | -1.816701314 | 1.389353755  |
| 6 | -5.484946006 | 3.216344549  | 0.527606197  | 1 | 2.141078621  | -0.115120191 | -0.158856184 |
| 1 | -6.264211555 | 3.986727498  | 0.613539484  | 6 | -1.674623325 | -1.887755118 | -3.947083196 |
| 7 | -4.859030015 | 3.283339477  | -0.769051574 | 6 | -0.003457550 | -0.577938358 | -5.002178263 |
| 6 | -4.088304497 | 4.568419663  | 2.151361760  | 6 | 0.600083731  | -2.482842105 | -3.719075911 |

|   |              |              |              |   |              |              |              |
|---|--------------|--------------|--------------|---|--------------|--------------|--------------|
| 6 | 0.006827170  | -0.256905940 | 5.037805605  | 6 | -0.758437401 | -6.681634386 | -0.031793707 |
| 6 | -0.606257768 | -2.237166054 | 3.879169619  | 1 | -1.262553389 | -7.656616779 | 0.009759705  |
| 6 | 1.671434050  | -1.640354144 | 4.070048736  | 7 | -1.060398869 | -5.910092693 | 1.146405163  |
| 1 | 0.236660817  | -3.226357564 | -3.017736726 | 6 | -2.394630149 | -5.923507669 | -1.823221285 |
| 1 | 1.611207060  | -2.179749738 | -3.465596279 | 1 | -2.268695152 | -5.615487927 | -2.867724965 |
| 1 | 0.639075064  | -2.961370825 | -4.693814959 | 1 | -2.877459859 | -6.907040825 | -1.759291708 |
| 1 | -0.558155695 | 0.355346823  | -5.037244611 | 6 | -2.348710426 | -5.907421274 | 1.781934974  |
| 1 | -0.288428562 | -1.179513868 | -5.861675993 | 1 | -2.767354447 | -6.921268415 | 1.736718515  |
| 1 | 1.061781845  | -0.374046222 | -5.062186161 | 1 | -2.194693538 | -5.593151430 | 2.820813833  |
| 1 | -2.389928416 | -1.118306727 | -4.217765571 | 7 | -3.244121904 | -4.950232201 | -1.195160272 |
| 1 | -2.012868653 | -2.385437876 | -3.044987477 | 6 | -4.012285867 | -5.219451836 | -0.008522300 |
| 1 | -1.648300165 | -2.636041129 | -4.734565128 | 1 | -4.401068954 | -6.246672023 | -0.029988461 |
| 1 | -1.615737237 | -1.946261274 | 3.605582929  | 7 | -3.290432878 | -4.980864694 | 1.217950675  |
| 1 | -0.648209193 | -2.651453629 | 4.882782721  | 6 | -3.637235579 | -3.797775970 | -1.824520113 |
| 1 | -0.246728154 | -3.026391637 | 3.227419130  | 8 | -3.160647517 | -3.341470681 | -2.839888668 |
| 1 | 2.390724209  | -0.858646750 | 4.290243330  | 6 | -3.812597428 | -3.944279521 | 1.947064983  |
| 1 | 2.006713336  | -2.197465212 | 3.202215624  | 8 | -3.437138850 | -3.583775102 | 3.040314015  |
| 1 | 1.640894879  | -2.335501094 | 4.904685289  | 7 | -4.715007391 | -3.289693080 | -1.144883501 |
| 1 | -1.057195812 | -0.043219910 | 5.083674236  | 6 | -5.084913931 | -4.100119609 | -0.008933041 |
| 1 | 0.567028153  | 0.673434832  | 5.013502260  | 1 | -6.124316549 | -4.442793092 | -0.104767573 |
| 1 | 0.287738102  | -0.803792889 | 5.934382191  | 7 | -4.888244931 | -3.448639278 | 1.258465267  |

---

**CB[8]•G4**

|   |              |              |              |   |              |              |              |
|---|--------------|--------------|--------------|---|--------------|--------------|--------------|
| 7 | 4.792018330  | -3.513998647 | -1.482892533 | 1 | -6.609315562 | -2.759150271 | -1.800582402 |
| 6 | 5.169162521  | -4.208562760 | -0.275160554 | 1 | -5.208113775 | -2.138654165 | -2.757387532 |
| 1 | 6.216563710  | -4.535624280 | -0.330428148 | 6 | -5.843398191 | -2.557653609 | 1.853342456  |
| 7 | 4.940244364  | -3.440148653 | 0.919863751  | 1 | -6.849713502 | -2.976947228 | 1.727364539  |
| 6 | 3.739369279  | -4.110655259 | -2.127672246 | 1 | -5.580612078 | -2.479476962 | 2.914579074  |
| 8 | 3.278940357  | -3.771064023 | -3.195029363 | 7 | -5.659209860 | -1.064275713 | -1.079253194 |
| 6 | 3.894384903  | -3.924666612 | 1.664037174  | 6 | -6.464522328 | -0.833702427 | 0.095744474  |
| 8 | 3.520664174  | -3.478158754 | 2.724560341  | 1 | -7.437339761 | -1.334292026 | -0.001329064 |
| 7 | 3.354589305  | -5.197393816 | -1.387790067 | 7 | -5.822792932 | -1.222963809 | 1.324683735  |
| 6 | 4.123697972  | -5.350171934 | -0.179895920 | 6 | -5.275369749 | 0.100792534  | -1.692921176 |
| 1 | 4.537386532  | -6.366036061 | -0.120515821 | 8 | -4.629779528 | 0.189068899  | -2.713376805 |
| 7 | 3.401770472  | -5.033151358 | 1.029494822  | 6 | -5.415318257 | -0.147545617 | 2.070261052  |
| 6 | 2.446981709  | -6.188324760 | -1.893141487 | 8 | -4.860678988 | -0.192944135 | 3.145921547  |
| 1 | 2.874346924  | -7.184317606 | -1.728898084 | 7 | -5.805094859 | 1.148171621  | -0.984621781 |
| 1 | 2.320202359  | -5.984930708 | -2.962771110 | 6 | -6.515684444 | 0.712865978  | 0.188776970  |
| 6 | 2.476742355  | -5.925458403 | 1.669686823  | 1 | -7.522747754 | 1.150778742  | 0.213671304  |
| 1 | 2.368834633  | -5.575166732 | 2.703022555  | 7 | -5.816718828 | 0.988349882  | 1.419957157  |
| 1 | 2.879053566  | -6.945681724 | 1.640211497  | 6 | -5.923205808 | 2.473208488  | -1.532537650 |
| 7 | 1.134725906  | -6.139499673 | -1.310760799 | 1 | -6.955742123 | 2.818131323  | -1.397390697 |
| 6 | 0.791331804  | -6.732467569 | -0.044283135 | 1 | -5.669128081 | 2.407121515  | -2.596802818 |
| 1 | 1.230516375  | -7.735969020 | 0.037839600  | 6 | -5.784644602 | 2.280334631  | 2.046227564  |
| 7 | 1.158109968  | -5.927258064 | 1.094945191  | 1 | -6.790834539 | 2.717192967  | 2.027219552  |
| 6 | 0.040305311  | -5.688745942 | -1.998693823 | 1 | -5.449344858 | 2.113288490  | 3.076583609  |
| 8 | 0.048572350  | -5.169329507 | -3.092864154 | 7 | -4.862737430 | 3.200254632  | 1.442406654  |
| 6 | 0.067792693  | -5.448611169 | 1.775565082  | 6 | -5.197727201 | 4.049420333  | 0.328793228  |
| 8 | 0.098215540  | -4.786606028 | 2.788439875  | 1 | -6.225225893 | 4.424236361  | 0.432043268  |
| 7 | -1.073898236 | -6.006136637 | -1.266943017 | 7 | -5.018562490 | 3.430843742  | -0.962998903 |
|   |              |              |              | 6 | -3.704146144 | 3.582416703  | 2.067583112  |

|   |              |             |              |   |              |              |              |
|---|--------------|-------------|--------------|---|--------------|--------------|--------------|
| 8 | -3.213625688 | 3.060858782 | 3.042872935  | 6 | 6.409601126  | 0.669695044  | -0.441575336 |
| 6 | -4.031862555 | 4.023097369 | -1.702783528 | 1 | 7.384653377  | 1.157025153  | -0.568620021 |
| 8 | -3.735094051 | 3.758221827 | -2.845805848 | 7 | 5.534371492  | 0.972392648  | -1.546831803 |
| 7 | -3.227435023 | 4.700762793 | 1.430883336  | 6 | 5.446879028  | -0.089033641 | 1.541514430  |
| 6 | -4.087984266 | 5.132021671 | 0.355594735  | 8 | 4.888495326  | -0.073982282 | 2.620900091  |
| 1 | -4.439470846 | 6.158273378 | 0.530500016  | 6 | 5.063449029  | -0.157436095 | -2.168910795 |
| 7 | -3.477872713 | 5.021031626 | -0.943275152 | 8 | 4.321632792  | -0.175548762 | -3.125243194 |
| 6 | -2.263356934 | 5.562677713 | 2.059723105  | 7 | 5.839029477  | -1.200555583 | 0.855704388  |
| 1 | -2.690094008 | 6.568992608 | 2.162964865  | 6 | 6.438083837  | -0.880922486 | -0.418743399 |
| 1 | -2.049890430 | 5.128632253 | 3.043492541  | 1 | 7.431198156  | -1.339917266 | -0.502893496 |
| 6 | -2.600632562 | 6.011635015 | -1.501891578 | 7 | 5.614669105  | -1.245975766 | -1.544031458 |
| 1 | -2.572530954 | 5.826181067 | -2.581754886 | 6 | 5.887629830  | -2.504509297 | 1.458714186  |
| 1 | -2.996509162 | 7.011435773 | -1.288625367 | 1 | 6.899551318  | -2.912597528 | 1.345861921  |
| 7 | -1.012697651 | 5.648369657 | 1.359328267  | 1 | 5.635112285  | -2.376107971 | 2.517584808  |
| 6 | -0.796381000 | 6.511371806 | 0.221409434  | 6 | 5.631252075  | -2.551414630 | -2.142713260 |
| 1 | -1.261663865 | 7.491623313 | 0.383420009  | 1 | 6.664332683  | -2.922192822 | -2.161114723 |
| 7 | -1.247419265 | 5.935824003 | -1.021109999 | 1 | 5.237240620  | -2.447188712 | -3.160264028 |
| 6 | 0.158573210  | 5.198062676 | 1.911185323  | 6 | -0.236636826 | -0.863982336 | -1.280871523 |
| 8 | 0.268139886  | 4.472133731 | 2.873014494  | 6 | -1.651321582 | -0.545874563 | -0.787761540 |
| 6 | -0.213349668 | 5.489219482 | -1.788831420 | 6 | -1.742231350 | 0.951649492  | -0.484849782 |
| 8 | -0.312658834 | 4.907293196 | -2.852150401 | 6 | 0.076952976  | -0.059213500 | -2.545857139 |
| 7 | 1.196653121  | 5.746692224 | 1.202641472  | 6 | 0.983305146  | 1.779065906  | -1.128906421 |
| 6 | 0.747817621  | 6.516363651 | 0.074585636  | 6 | -1.435776033 | 1.758693733  | -1.747927983 |
| 1 | 1.217770551  | 7.507772107 | 0.063568257  | 6 | -0.022211350 | 1.429557792  | -2.221757633 |
| 7 | 0.959747981  | 5.833227205 | -1.181737988 | 6 | -1.953496926 | -1.350208107 | 0.473883864  |
| 6 | 2.542525467  | 5.781571648 | 1.704388987  | 6 | 0.470852857  | -1.319283353 | 1.100861042  |
| 1 | 2.503619863  | 5.481956680 | 2.757655624  | 6 | -0.950286151 | -0.997518163 | 1.570459539  |
| 1 | 2.934240789  | 6.800195647 | 1.605286049  | 6 | -1.033874886 | 0.496515546  | 1.895953499  |
| 6 | 2.224140979  | 5.807440426 | -1.869524658 | 6 | -0.023939761 | 0.868110016  | 2.986177528  |
| 1 | 2.678783610  | 6.803925272 | -1.819981058 | 6 | 1.381731701  | 0.531168142  | 2.495452087  |
| 1 | 2.014812963  | 5.531421882 | -2.908942885 | 6 | 1.478347360  | -0.961982467 | 2.195128316  |
| 7 | 3.427830528  | 4.861131102 | 1.046636456  | 6 | 0.763240030  | -0.522172032 | -0.173102901 |
| 6 | 4.034964667  | 5.101016088 | -0.239445366 | 6 | 1.681356064  | 1.336674398  | 1.235228314  |
| 1 | 4.430323106  | 6.123708588 | -0.293572615 | 6 | -0.743726606 | 1.295378342  | 0.622600942  |
| 7 | 3.151647276  | 4.838835928 | -1.350140659 | 6 | 0.676561710  | 0.977470905  | 0.138460286  |
| 6 | 3.957978375  | 3.779683665 | 1.687278839  | 7 | 0.298739270  | 2.239143774  | -3.434161126 |
| 8 | 3.638535963  | 3.372461069 | 2.784613807  | 7 | 2.390742347  | 0.894596257  | 3.532396166  |
| 6 | 3.531872881  | 3.738025996 | -2.069840567 | 1 | -0.172640283 | -1.932730501 | -1.519590569 |
| 8 | 2.973650216  | 3.314048984 | -3.060165034 | 1 | -2.373484700 | -0.808224647 | -1.569999653 |
| 7 | 4.941994747  | 3.254079509 | 0.896112229  | 1 | -2.757534533 | 1.186077017  | -0.141736485 |
| 6 | 5.093552375  | 3.971617890 | -0.345858020 | 1 | 1.078642767  | -0.312955000 | -2.900195987 |
| 1 | 6.130459043  | 4.308623794 | -0.473742889 | 1 | -0.643276711 | -0.334746829 | -3.318035615 |
| 7 | 4.659812103  | 3.219336759 | -1.499348816 | 1 | 0.935834292  | 2.846477666  | -0.906783684 |
| 6 | 5.912714406  | 2.327540989 | 1.408525244  | 1 | 1.989130026  | 1.532719902  | -1.473473202 |
| 1 | 6.920562215  | 2.724094713 | 1.236404486  | 1 | -2.171192879 | 1.514617112  | -2.517143656 |
| 1 | 5.718481362  | 2.222752091 | 2.481495338  | 1 | -1.518049028 | 2.824944113  | -1.532348125 |
| 6 | 5.488319639  | 2.262624839 | -2.180868225 | 1 | -2.967062950 | -1.138067357 | 0.826823653  |
| 1 | 6.507952761  | 2.659942348 | -2.262740621 | 1 | -1.899631318 | -2.421464380 | 0.253229998  |
| 1 | 5.052580746  | 2.111651580 | -3.174999085 | 1 | 0.541620780  | -2.392997746 | 0.888455661  |
| 7 | 5.825862654  | 1.013596230 | 0.830175583  | 1 | -1.186744434 | -1.587497747 | 2.463772524  |

|   |              |              |              |
|---|--------------|--------------|--------------|
| 1 | -2.041205525 | 0.732672956  | 2.257497194  |
| 1 | -0.263710309 | 0.304608036  | 3.888379234  |
| 1 | -0.111157132 | 1.933808752  | 3.208152462  |
| 1 | 2.486879645  | -1.220320441 | 1.868529972  |
| 1 | 1.260299346  | -1.557562129 | 3.082694526  |
| 1 | 1.773538095  | -0.765121693 | -0.525621213 |
| 1 | 1.595886946  | 2.399893832  | 1.464318842  |
| 1 | 2.694349860  | 1.125002672  | 0.888422651  |
| 1 | -0.820668817 | 2.363469939  | 0.859184962  |
| 1 | -0.159655320 | 1.852655471  | -4.263598440 |
| 1 | -0.019318562 | 3.223150748  | -3.315748003 |
| 1 | 1.318453200  | 2.284574049  | -3.590055918 |
| 1 | 2.546018070  | 1.915912427  | 3.555649379  |
| 1 | 3.309774402  | 0.464286180  | 3.308460563  |
| 1 | 2.097495559  | 0.571106293  | 4.457671221  |

---
